# Supplementary material for: Systematic assessment of DFT methods for geometry optimization of mononuclear platinum-containing complexes
Source: Royal Society of Chemistry journal article supplement (doi:10.1039/d1cp01851e), 2021-01-01
Supplement: d1cp01851e1.pdf [file d1cp01851e1.pdf]

## **SUPPORTING INFORMATION**

### **Systematic assessment of DFT methods for geometry optimization of mononuclear platinum-containing complexes**

Louise M. Debeve and Christopher J. Pollock\*

Cornell High Energy Synchrotron Source, Wilson Laboratory, Cornell University, Ithaca, New York 14853, United States

\*Corresponding author: [cjp227@cornell.edu](mailto:cjp227@cornell.edu)

## Equations used

Root mean square deviation (calculated with Chimera)

$$RMSD = \sqrt{\frac{\sum (x_1 - x_0)^2}{n}}$$

**Where:**

$x_0$  = is the experimental value

$x_1$  = calculated value

$n$  = total number of values

Percent deviation

$$\Delta = \frac{\sum_{i=1}^n (|y_i - x_i|/x_i)}{n} \times 100$$

**Where:**

$y_i$  = calculated value

$x_i$  = experimental value as reported by crystallographic data

$n$  = number of bonds

## Sample input files

### Sample geometry optimization input file using B3LYP/ZORA/TZVP/D3BJ/CPCM:

```
! UKS B3LYP RIJCOSX ZORA ZORA-def2-TZVP SARC/J TightSCF SlowConv D3BJ CPCM
! NormalPrint Grid7 GridX7 NoFinalGrid
! OPT
! PAL8

%basis
  newgto Pt "SARC-ZORA-TZVP" end
  end

%method
  SpecialGridAtoms 78
  SpecialGridIntAcc 7
  end

%maxcore 1024

%scf
  maxiter 500
  end

%cpcm
  surfacetype vdw_gaussian
  end

%geom
  maxiter 200
  end

* xyzfile 0 1 CDMSOP.xyz
```

**Sample geometry optimization input file using BP86/DKH2/SVP/D3BJ/CPCM:**

```
! UKS BP86 DKH2 DKH-def2-SVP SARC/J TightSCF SlowConv D3BJ CPCM
! NormalPrint Grid7 NoFinalGrid
! OPT
! PAL8
```

```
%basis
  newgto Pt "SARC-DKH-TZVP" end
end
```

```
%method
  SpecialGridAtoms 78
  SpecialGridIntAcc 7
end
```

```
%rel
  Dkh1CAutoAux true
end
```

```
%maxcore 1024
```

```
%scf
  maxiter 500
end
```

```
%ccp
  surfacetype vdw_gaussian
end
```

```
%geom
  maxiter 200
end
```

```
* xyzfile 0 1 CDMSOP.xyz
```

**Sample geometry optimization input file using PBE0/ZORA/TZVP/CPCM:**

```
! UKS PBE0 RIJCOSX ZORA ZORA-def2-TZVP SARC/J TightSCF SlowConv CPCM  
! NormalPrint Grid7 GridX7 NoFinalGrid  
! OPT  
! PAL8
```

```
%basis  
  newgto Pt "SARC-ZORA-TZVP" end  
end
```

```
%method  
  SpecialGridAtoms 78  
  SpecialGridIntAcc 7  
end
```

```
%maxcore 1024
```

```
%scf  
  maxiter 500  
end
```

```
%cpcm  
  surfacetype vdw_gaussian  
end
```

```
%geom  
  maxiter 200  
end
```

```
* xyzfile 0 1 GUDCEN.xyz
```

## Sample geometry optimization input file using PBE/ZORA/SVP/D3BJ/CPCM

```
! UKS PBE ZORA ZORA-def2-SVP SARC/J TightSCF SlowConv D3BJ CPCM  
! NormalPrint Grid7 NoFinalGrid  
! OPT  
! PAL8
```

```
%basis  
  newgto Pt "SARC-ZORA-TZVP" end  
end
```

```
%method  
  SpecialGridAtoms 78  
  SpecialGridIntAcc 7  
end
```

```
%maxcore 1024
```

```
%scf  
  maxiter 500  
end
```

```
%cpcm  
  surfacetype vdw_gaussian  
end
```

```
%geom  
  maxiter 200  
end
```

```
* xyzfile 0 1 GUDCEN.xyz
```

## Sample geometry optimization input file using TPSSh/DKH2/TZVP/D3BJ/CPCM

! UKS TPSSh RIJCOSX DKH2 DKH-def2-TZVP SARC/J TightSCF SlowConv D3BJ CPCM

! NormalPrint Grid7 GridX7 NoFinalGrid

! OPT

! PAL8

%basis

newgto Pt "SARC-DKH-TZVP" end

end

%method

SpecialGridAtoms 78

SpecialGridIntAcc 7

end

%rel

Dkh1CAutoAux true

end

%maxcore 1024

%scf

maxiter 500

end

%cpcm

surfacetype vdw\_gaussian

end

%geom

maxiter 200

end

\* xyzfile 0 1 GUDCEN.xyz

**Sample numerical frequency calculation input file using PBE0/ZORA/TZVP/CPCM:**

```
! UKS PBE0 RIJCOSX ZORA ZORA-def2-TZVP SARC/J TightSCF SlowConv CPCM
! NormalPrint Grid7 GridX7 NoFinalGrid
! NumFreq
! PAL8
```

```
%basis
  newgto Pt "SARC-ZORA-TZVP" end
end
```

```
%method
  SpecialGridAtoms 78
  SpecialGridIntAcc 7
end
```

```
%maxcore 1024
```

```
%scf
  maxiter 500
end
```

```
%cpcm
  surfacetype vdw_gaussian
end
```

```
* xyzfile 0 1 GUDCEN_PBE0_ZORA_TZVP_CPCM.xyz
```



## Supplementary figures

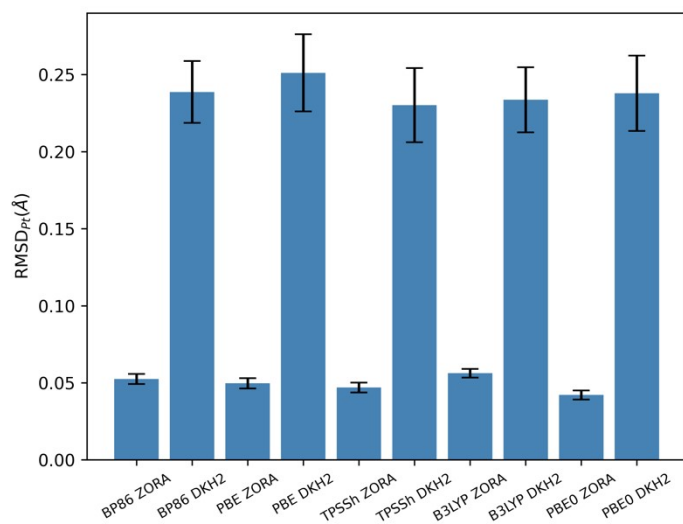

Figure S1:  $RMSD_{pt}$  of the five different functionals coupled with 2 ways of accounting for relativistics

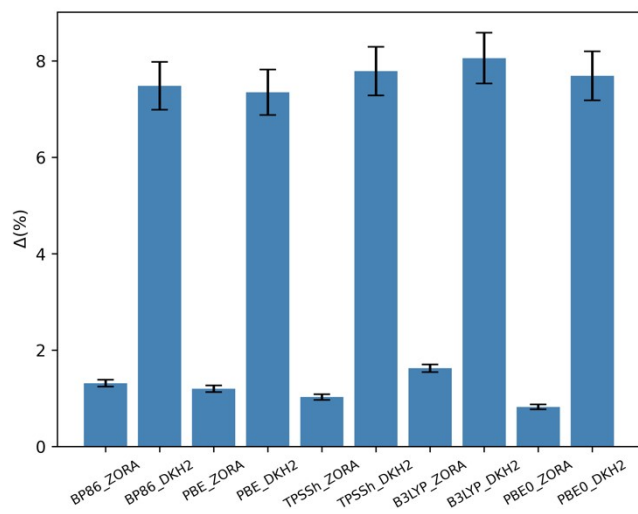

Figure S2:  $\Delta$  of the five different functionals coupled with 2 ways of accounting for relativistics

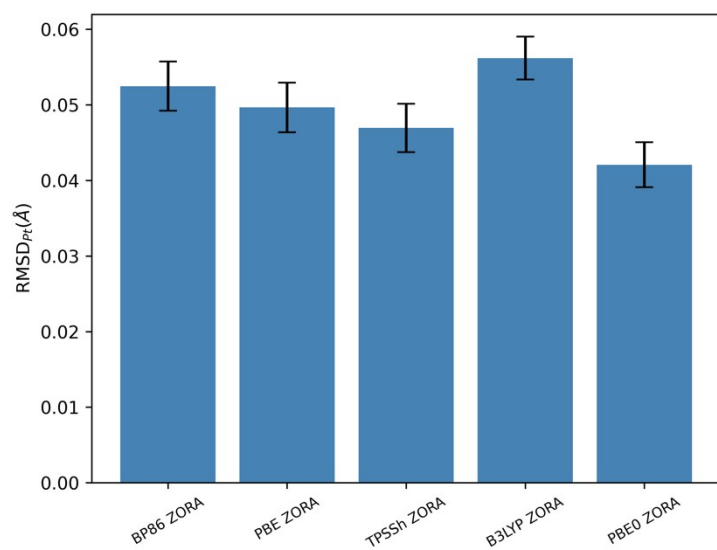

Figure S3: RMSD<sub>pt</sub> of the five different functionals coupled using the ZORA approximation for relativistics

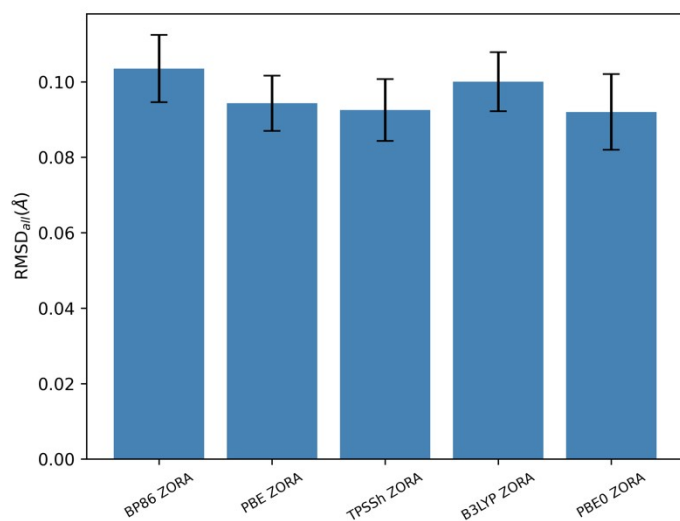

Figure S4: RMSD<sub>all</sub> of the five different functionals coupled using the ZORA approximation for relativistics

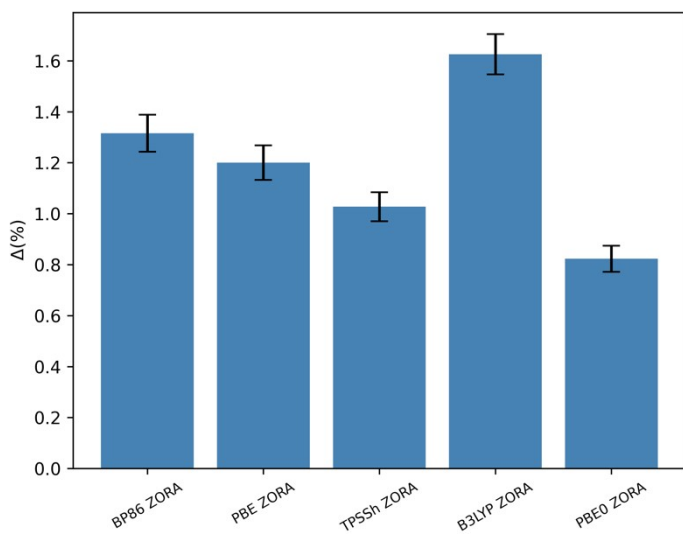

Figure S5: Mean percent deviation of the five different functionals coupled using the ZORA approximation for relativistics

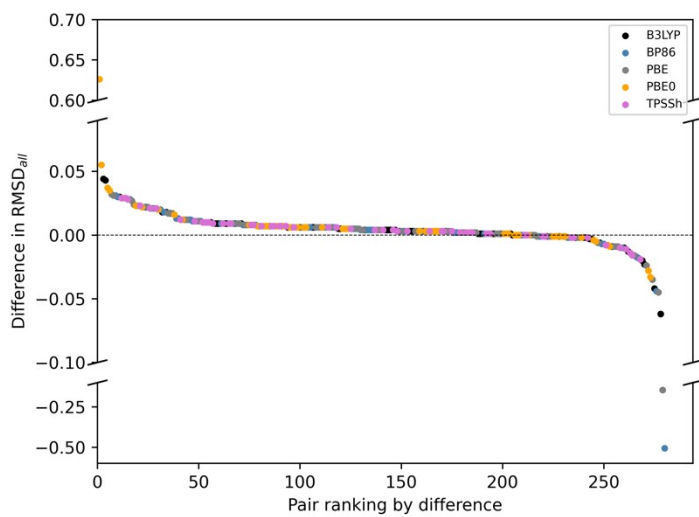

Figure S6:  $\text{RMSD}_{\text{all}}$  showing the effect of basis set using TZVP instead of SVP. The 3 outliers are caused by rotations of outlying ligand fragments, resulting in an unusually high  $\text{RMSD}_{\text{all}}$ . Those case were: (8) calculated using PBE0/ZORA/SVP/CPCM, (10) calculated using BP86/ZORA/TXVP/D3BJ/CPCM and (11) calculated using PBE/ZORA/SVP.

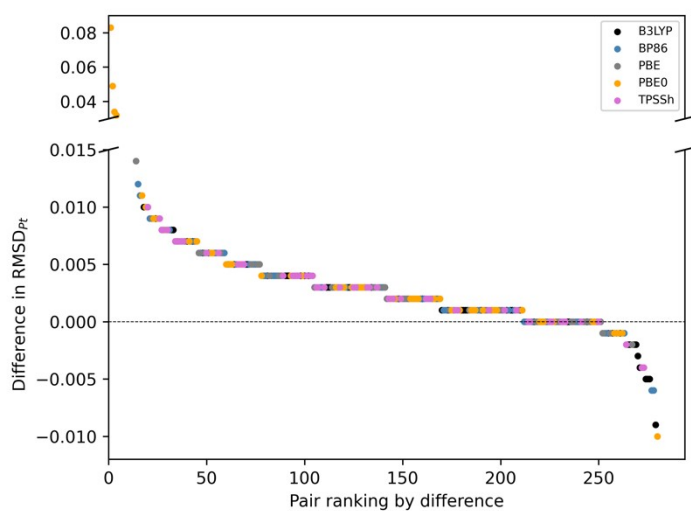

Figure S7: RMSD<sub>pt</sub> showing the effect of basis set using TZVP instead of SVP.

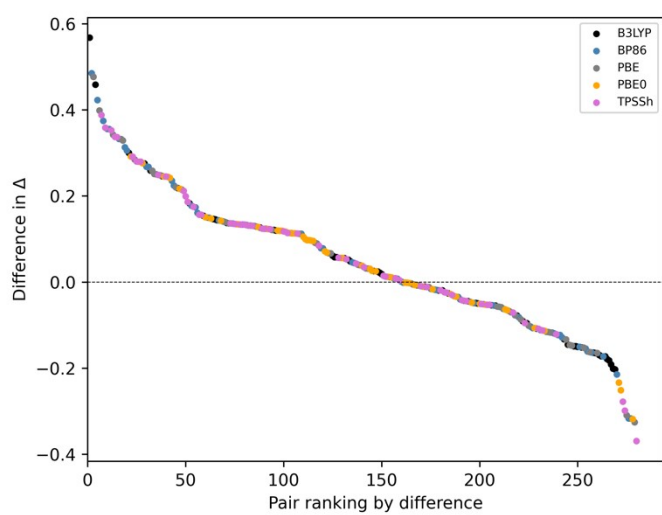

Figure S8:  $\Delta$  showing the effect of basis set using TZVP instead of SVP.

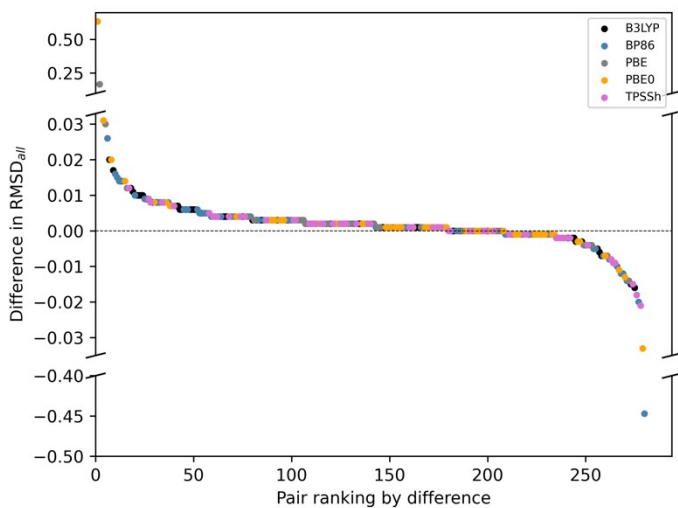

Figure S9: RMSD<sub>all</sub> showing the effect of accounting for dispersion using D3BJ. The 3 outliers are caused by rotations of outlying ligand fragments, resulting in an unusually high RMSD<sub>all</sub>. Those case were: (8) calculated using PBE0/ZORA/SVP/CPCM, (10) calculated using BP86/ZORA/TXVP/D3BJ/CPCM and (11) calculated using PBE/ZORA/SVP.

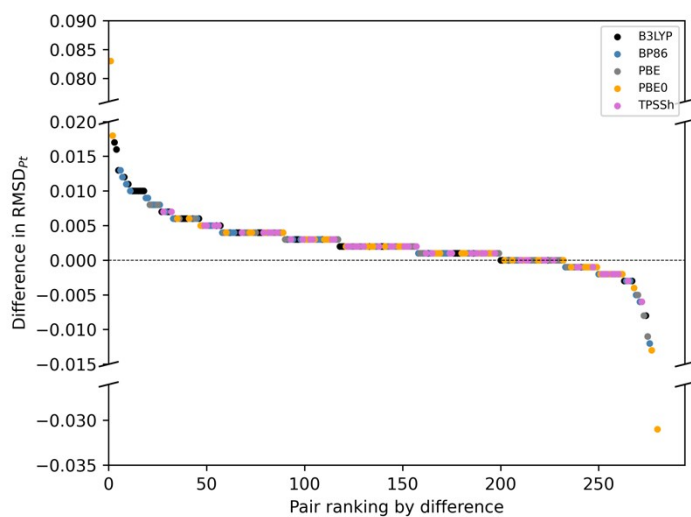

Figure S10: RMSD<sub>pt</sub> showing the effect of accounting for dispersion using D3BJ

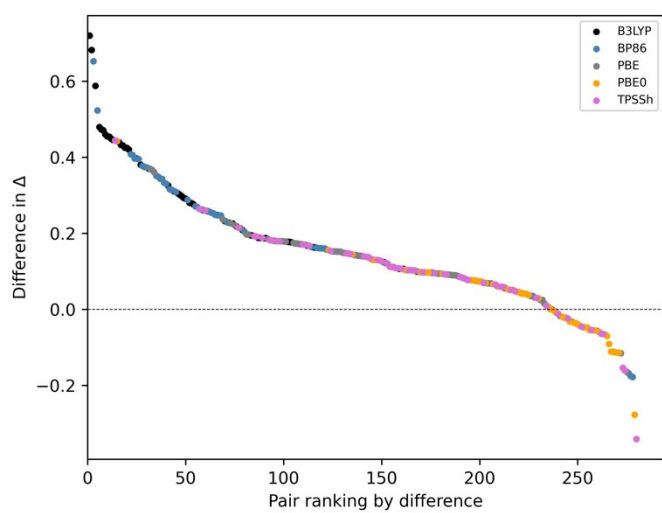

Figure S11:  $\Delta$  showing the effect of accounting for dispersion using D3BJ

## Supplementary tables

Table S1: Combinations of functional, basis set, relativistics, solvation and dispersion forming the 80 different methods used in this study

| Functional | Pt Basis Set   | Ligand Basis Set | Relativistics | Solvation  | Dispersion |
|------------|----------------|------------------|---------------|------------|------------|
| BP86       | SARC-ZORA-TZVP | ZORA-def2-SVP    | ZORA          | ---        | ---        |
|            | SARC-ZORA-TZVP | ZORA-def2-SVP    | ZORA          | CPCM (inf) | ---        |
|            | SARC-ZORA-TZVP | ZORA-def2-SVP    | ZORA          | ---        | D3BJ       |
|            | SARC-ZORA-TZVP | ZORA-def2-SVP    | ZORA          | CPCM (inf) | D3BJ       |
|            | SARC-DKH-TZVP  | DKH-def2-SVP     | DKH2          | ---        | ---        |
|            | SARC-DKH-TZVP  | DKH-def2-SVP     | DKH2          | CPCM (inf) | ---        |
|            | SARC-DKH-TZVP  | DKH-def2-SVP     | DKH2          | ---        | D3BJ       |
|            | SARC-DKH-TZVP  | DKH-def2-SVP     | DKH2          | CPCM (inf) | D3BJ       |
|            | SARC-ZORA-TZVP | ZORA-def2-TZVP   | ZORA          | ---        | ---        |
|            | SARC-ZORA-TZVP | ZORA-def2-TZVP   | ZORA          | CPCM (inf) | ---        |
|            | SARC-ZORA-TZVP | ZORA-def2-TZVP   | ZORA          | ---        | D3BJ       |
|            | SARC-ZORA-TZVP | ZORA-def2-TZVP   | ZORA          | CPCM (inf) | D3BJ       |
|            | SARC-DKH-TZVP  | DKH-def2-TZVP    | DKH2          | ---        | ---        |
|            | SARC-DKH-TZVP  | DKH-def2-TZVP    | DKH2          | CPCM (inf) | ---        |
|            | SARC-DKH-TZVP  | DKH-def2-TZVP    | DKH2          | ---        | D3BJ       |
|            | SARC-DKH-TZVP  | DKH-def2-TZVP    | DKH2          | CPCM (inf) | D3BJ       |
| TPSSH      | SARC-ZORA-TZVP | ZORA-def2-SVP    | ZORA          | ---        | ---        |
|            | SARC-ZORA-TZVP | ZORA-def2-SVP    | ZORA          | CPCM (inf) | ---        |
|            | SARC-ZORA-TZVP | ZORA-def2-SVP    | ZORA          | ---        | D3BJ       |
|            | SARC-ZORA-TZVP | ZORA-def2-SVP    | ZORA          | CPCM (inf) | D3BJ       |
|            | SARC-DKH-TZVP  | DKH-def2-SVP     | DKH2          | ---        | ---        |
|            | SARC-DKH-TZVP  | DKH-def2-SVP     | DKH2          | CPCM (inf) | ---        |
|            | SARC-DKH-TZVP  | DKH-def2-SVP     | DKH2          | ---        | D3BJ       |
|            | SARC-DKH-TZVP  | DKH-def2-SVP     | DKH2          | CPCM (inf) | D3BJ       |
|            | SARC-ZORA-TZVP | ZORA-def2-TZVP   | ZORA          | ---        | ---        |
|            | SARC-ZORA-TZVP | ZORA-def2-TZVP   | ZORA          | CPCM (inf) | ---        |
|            | SARC-ZORA-TZVP | ZORA-def2-TZVP   | ZORA          | ---        | D3BJ       |
|            | SARC-ZORA-TZVP | ZORA-def2-TZVP   | ZORA          | CPCM (inf) | D3BJ       |
|            | SARC-DKH-TZVP  | DKH-def2-TZVP    | DKH2          | ---        | ---        |
|            | SARC-DKH-TZVP  | DKH-def2-TZVP    | DKH2          | CPCM (inf) | ---        |
|            | SARC-DKH-TZVP  | DKH-def2-TZVP    | DKH2          | ---        | D3BJ       |
|            | SARC-DKH-TZVP  | DKH-def2-TZVP    | DKH2          | CPCM (inf) | D3BJ       |
| B3LYP      | SARC-ZORA-TZVP | ZORA-def2-SVP    | ZORA          | ---        | ---        |
|            | SARC-ZORA-TZVP | ZORA-def2-SVP    | ZORA          | CPCM (inf) | ---        |
|            | SARC-ZORA-TZVP | ZORA-def2-SVP    | ZORA          | ---        | D3BJ       |
|            | SARC-ZORA-TZVP | ZORA-def2-SVP    | ZORA          | CPCM (inf) | D3BJ       |
|            | SARC-DKH-TZVP  | DKH-def2-SVP     | DKH2          | ---        | ---        |
|            | SARC-DKH-TZVP  | DKH-def2-SVP     | DKH2          | CPCM (inf) | ---        |
|            | SARC-DKH-TZVP  | DKH-def2-SVP     | DKH2          | ---        | D3BJ       |
|            | SARC-DKH-TZVP  | DKH-def2-SVP     | DKH2          | CPCM (inf) | D3BJ       |
|            | SARC-ZORA-TZVP | ZORA-def2-TZVP   | ZORA          | ---        | ---        |
|            | SARC-ZORA-TZVP | ZORA-def2-TZVP   | ZORA          | CPCM (inf) | ---        |
|            | SARC-ZORA-TZVP | ZORA-def2-TZVP   | ZORA          | ---        | D3BJ       |
|            | SARC-ZORA-TZVP | ZORA-def2-TZVP   | ZORA          | CPCM (inf) | D3BJ       |
|            | SARC-DKH-TZVP  | DKH-def2-TZVP    | DKH2          | ---        | ---        |
|            | SARC-DKH-TZVP  | DKH-def2-TZVP    | DKH2          | CPCM (inf) | ---        |
|            | SARC-DKH-TZVP  | DKH-def2-TZVP    | DKH2          | ---        | D3BJ       |

|                |                |                |               |            |      |
|----------------|----------------|----------------|---------------|------------|------|
|                | SARC-DKH-TZVP  | DKH-def2-TZVP  | DKH2          | ---        | D3BJ |
|                | SARC-DKH-TZVP  | DKH-def2-TZVP  | DKH2          | CPCM (inf) | D3BJ |
| PBE            | SARC-ZORA-TZVP | ZORA-def2-SVP  | ZORA          | ---        | ---  |
|                | SARC-ZORA-TZVP | ZORA-def2-SVP  | ZORA          | CPCM (inf) | ---  |
|                | SARC-ZORA-TZVP | ZORA-def2-SVP  | ZORA          | ---        | D3BJ |
|                | SARC-ZORA-TZVP | ZORA-def2-SVP  | ZORA          | CPCM (inf) | D3BJ |
|                | SARC-DKH-TZVP  | DKH-def2-SVP   | DKH2          | ---        | ---  |
|                | SARC-DKH-TZVP  | DKH-def2-SVP   | DKH2          | CPCM (inf) | ---  |
|                | SARC-DKH-TZVP  | DKH-def2-SVP   | DKH2          | ---        | D3BJ |
|                | SARC-DKH-TZVP  | DKH-def2-SVP   | DKH2          | CPCM (inf) | D3BJ |
|                | SARC-ZORA-TZVP | ZORA-def2-TZVP | ZORA          | ---        | ---  |
|                | SARC-ZORA-TZVP | ZORA-def2-TZVP | ZORA          | CPCM (inf) | ---  |
|                | SARC-ZORA-TZVP | ZORA-def2-TZVP | ZORA          | ---        | D3BJ |
|                | SARC-ZORA-TZVP | ZORA-def2-TZVP | ZORA          | CPCM (inf) | D3BJ |
|                | SARC-DKH-TZVP  | DKH-def2-TZVP  | DKH2          | ---        | ---  |
|                | SARC-DKH-TZVP  | DKH-def2-TZVP  | DKH2          | CPCM (inf) | ---  |
|                | SARC-DKH-TZVP  | DKH-def2-TZVP  | DKH2          | ---        | D3BJ |
|                | SARC-DKH-TZVP  | DKH-def2-TZVP  | DKH2          | CPCM (inf) | D3BJ |
|                | PBE0           | SARC-ZORA-TZVP | ZORA-def2-SVP | ZORA       | ---  |
| SARC-ZORA-TZVP |                | ZORA-def2-SVP  | ZORA          | CPCM (inf) | ---  |
| SARC-ZORA-TZVP |                | ZORA-def2-SVP  | ZORA          | ---        | D3BJ |
| SARC-ZORA-TZVP |                | ZORA-def2-SVP  | ZORA          | CPCM (inf) | D3BJ |
| SARC-DKH-TZVP  |                | DKH-def2-SVP   | DKH2          | ---        | ---  |
| SARC-DKH-TZVP  |                | DKH-def2-SVP   | DKH2          | CPCM (inf) | ---  |
| SARC-DKH-TZVP  |                | DKH-def2-SVP   | DKH2          | ---        | D3BJ |
| SARC-DKH-TZVP  |                | DKH-def2-SVP   | DKH2          | CPCM (inf) | D3BJ |
| SARC-ZORA-TZVP |                | ZORA-def2-TZVP | ZORA          | ---        | ---  |
| SARC-ZORA-TZVP |                | ZORA-def2-TZVP | ZORA          | CPCM (inf) | ---  |
| SARC-ZORA-TZVP |                | ZORA-def2-TZVP | ZORA          | ---        | D3BJ |
| SARC-ZORA-TZVP |                | ZORA-def2-TZVP | ZORA          | CPCM (inf) | D3BJ |
| SARC-DKH-TZVP  |                | DKH-def2-TZVP  | DKH2          | ---        | ---  |
| SARC-DKH-TZVP  |                | DKH-def2-TZVP  | DKH2          | CPCM (inf) | ---  |
| SARC-DKH-TZVP  |                | DKH-def2-TZVP  | DKH2          | ---        | D3BJ |
| SARC-DKH-TZVP  |                | DKH-def2-TZVP  | DKH2          | CPCM (inf) | D3BJ |



Table S2: RMSD<sub>all</sub>, RMSD<sub>pt</sub> and  $\Delta$  ranking of the different methods for the average of all 14 complexes

| Name                      | Pt Basis Set   | Ligand Basis Set | Relativistics | Solvation  | Dispersion | RMSD <sub>all</sub> (Å) | Variance of RMSD <sub>all</sub> (Å) | RMSD <sub>pt</sub> (Å) | Variance of RMSD <sub>pt</sub> (Å) | $\Delta$ (%) | Variance of $\Delta$ (%) | RMSD <sub>all</sub> rank | RMSD <sub>pt</sub> rank | $\Delta$ rank |
|---------------------------|----------------|------------------|---------------|------------|------------|-------------------------|-------------------------------------|------------------------|------------------------------------|--------------|--------------------------|--------------------------|-------------------------|---------------|
| PBE0_ZORA_TZVP_D3BJ_CPCM  | SARC-ZORA-TZVP | ZORA-def2-TZVP   | ZORA          | CPCM (inf) | D3BJ       | 0.066                   | 0.014                               | 0.034                  | 0.009                              | 0.60         | 0.13                     | 1*                       | 1*                      | 1*            |
| PBE0_ZORA_TZVP_CPCM       | SARC-ZORA-TZVP | ZORA-def2-TZVP   | ZORA          | CPCM (inf) | ---        | 0.067                   | 0.013                               | 0.034                  | 0.007                              | 0.64         | 0.13                     | 2*                       | 1*                      | 2*            |
| PBE0_ZORA_SVP_D3BJ_CPCM   | SARC-ZORA-TZVP | ZORA-def2-SVP    | ZORA          | CPCM (inf) | D3BJ       | 0.069                   | 0.014                               | 0.038                  | 0.009                              | 0.69         | 0.13                     | 3*                       | 3*                      | 3*            |
| TPSSH_ZORA_TZVP_D3BJ_CPCM | SARC-ZORA-TZVP | ZORA-def2-TZVP   | ZORA          | CPCM (inf) | D3BJ       | 0.071                   | 0.013                               | 0.039                  | 0.010                              | 0.85         | 0.14                     | 4*                       | 4*                      | 5             |
| TPSSH_ZORA_TZVP_CPCM      | SARC-ZORA-TZVP | ZORA-def2-TZVP   | ZORA          | CPCM (inf) | ---        | 0.071                   | 0.012                               | 0.039                  | 0.009                              | 0.96         | 0.14                     | 5*                       | 5*                      | 8             |
| PBE_ZORA_TZVP_D3BJ_CPCM   | SARC-ZORA-TZVP | ZORA-def2-TZVP   | ZORA          | CPCM (inf) | D3BJ       | 0.077                   | 0.013                               | 0.042                  | 0.009                              | 1.08         | 0.15                     | 8*                       | 6*                      | 14            |
| TPSSH_ZORA_SVP_D3BJ_CPCM  | SARC-ZORA-TZVP | ZORA-def2-SVP    | ZORA          | CPCM (inf) | D3BJ       | 0.075                   | 0.013                               | 0.043                  | 0.011                              | 0.96         | 0.15                     | 7*                       | 7*                      | 7             |
| BP86_ZORA_TZVP_D3BJ_CPCM  | SARC-ZORA-TZVP | ZORA-def2-TZVP   | ZORA          | CPCM (inf) | D3BJ       | 0.112                   | 0.036                               | 0.044                  | 0.009                              | 1.15         | 0.16                     | 29                       | 8                       | 18            |
| PBE_ZORA_TZVP_CPCM        | SARC-ZORA-TZVP | ZORA-def2-TZVP   | ZORA          | CPCM (inf) | ---        | 0.079                   | 0.013                               | 0.044                  | 0.008                              | 1.20         | 0.16                     | 10*                      | 9                       | 22            |
| PBE0_ZORA_TZVP_D3BJ       | SARC-ZORA-TZVP | ZORA-def2-TZVP   | ZORA          | ---        | D3BJ       | 0.099                   | 0.029                               | 0.044                  | 0.007                              | 0.97         | 0.13                     | 19                       | 10                      | 9             |
| TPSSH_ZORA_SVP_CPCM       | SARC-ZORA-TZVP | ZORA-def2-SVP    | ZORA          | CPCM (inf) | ---        | 0.074                   | 0.012                               | 0.044                  | 0.009                              | 1.09         | 0.15                     | 6*                       | 11                      | 15            |
| PBE0_ZORA_SVP_CPCM        | SARC-ZORA-TZVP | ZORA-def2-SVP    | ZORA          | CPCM (inf) | ---        | 0.115                   | 0.049                               | 0.045                  | 0.010                              | 0.74         | 0.13                     | 32                       | 12                      | 4             |
| PBE_ZORA_SVP_D3BJ_CPCM    | SARC-ZORA-TZVP | ZORA-def2-SVP    | ZORA          | CPCM (inf) | D3BJ       | 0.079                   | 0.012                               | 0.045                  | 0.009                              | 1.14         | 0.16                     | 11*                      | 13                      | 17            |
| PBE0_ZORA_TZVP            | SARC-ZORA-TZVP | ZORA-def2-TZVP   | ZORA          | ---        | ---        | 0.102                   | 0.028                               | 0.045                  | 0.007                              | 0.96         | 0.14                     | 20                       | 14                      | 6             |
| BP86_ZORA_TZVP_CPCM       | SARC-ZORA-TZVP | ZORA-def2-TZVP   | ZORA          | CPCM (inf) | ---        | 0.082                   | 0.013                               | 0.046                  | 0.009                              | 1.39         | 0.18                     | 15                       | 15                      | 29            |
| PBE_ZORA_SVP_CPCM         | SARC-ZORA-TZVP | ZORA-def2-SVP    | ZORA          | CPCM (inf) | ---        | 0.078                   | 0.012                               | 0.047                  | 0.009                              | 1.28         | 0.17                     | 9*                       | 16                      | 27            |
| BP86_ZORA_SVP_D3BJ_CPCM   | SARC-ZORA-TZVP | ZORA-def2-SVP    | ZORA          | CPCM (inf) | D3BJ       | 0.082                   | 0.012                               | 0.047                  | 0.009                              | 1.21         | 0.17                     | 14                       | 17                      | 23            |
| PBE0_ZORA_SVP_D3BJ        | SARC-ZORA-TZVP | ZORA-def2-SVP    | ZORA          | ---        | D3BJ       | 0.109                   | 0.029                               | 0.049                  | 0.008                              | 0.98         | 0.13                     | 24                       | 18                      | 10            |
| B3LYP_ZORA_TZVP_D3BJ_CPCM | SARC-ZORA-TZVP | ZORA-def2-TZVP   | ZORA          | CPCM (inf) | D3BJ       | 0.081                   | 0.012                               | 0.049                  | 0.008                              | 1.50         | 0.16                     | 13                       | 19                      | 36            |
| PBE0_ZORA_SVP             | SARC-ZORA-TZVP | ZORA-def2-SVP    | ZORA          | ---        | ---        | 0.109                   | 0.030                               | 0.049                  | 0.007                              | 1.00         | 0.14                     | 23                       | 20                      | 11            |
| BP86_ZORA_SVP_CPCM        | SARC-ZORA-TZVP | ZORA-def2-SVP    | ZORA          | CPCM (inf) | ---        | 0.083                   | 0.012                               | 0.050                  | 0.009                              | 1.47         | 0.19                     | 16                       | 21                      | 33            |
| B3LYP_ZORA_SVP_D3BJ_CPCM  | SARC-ZORA-TZVP | ZORA-def2-SVP    | ZORA          | CPCM (inf) | D3BJ       | 0.080                   | 0.012                               | 0.051                  | 0.008                              | 1.49         | 0.17                     | 12*                      | 22                      | 35            |
| TPSSH_ZORA_TZVP_D3BJ      | SARC-ZORA-TZVP | ZORA-def2-TZVP   | ZORA          | ---        | D3BJ       | 0.110                   | 0.028                               | 0.051                  | 0.009                              | 1.06         | 0.17                     | 26                       | 23                      | 13            |
| TPSSH_ZORA_TZVP           | SARC-ZORA-TZVP | ZORA-def2-TZVP   | ZORA          | ---        | ---        | 0.109                   | 0.027                               | 0.052                  | 0.008                              | 1.09         | 0.18                     | 22                       | 24                      | 16            |
| PBE_ZORA_TZVP_D3BJ        | SARC-ZORA-TZVP | ZORA-def2-TZVP   | ZORA          | ---        | D3BJ       | 0.109                   | 0.028                               | 0.052                  | 0.008                              | 1.18         | 0.21                     | 25                       | 25                      | 21            |
| B3LYP_ZORA_TZVP_CPCM      | SARC-ZORA-TZVP | ZORA-def2-TZVP   | ZORA          | CPCM (inf) | ---        | 0.086                   | 0.012                               | 0.053                  | 0.008                              | 1.82         | 0.19                     | 18                       | 26                      | 40            |
| PBE_ZORA_TZVP             | SARC-ZORA-TZVP | ZORA-def2-TZVP   | ZORA          | ---        | ---        | 0.110                   | 0.028                               | 0.054                  | 0.008                              | 1.26         | 0.24                     | 27                       | 27                      | 26            |
| TPSSH_ZORA_SVP_D3BJ       | SARC-ZORA-TZVP | ZORA-def2-SVP    | ZORA          | ---        | D3BJ       | 0.114                   | 0.029                               | 0.054                  | 0.009                              | 1.05         | 0.18                     | 31                       | 28                      | 12            |
| BP86_ZORA_TZVP_D3BJ       | SARC-ZORA-TZVP | ZORA-def2-TZVP   | ZORA          | ---        | D3BJ       | 0.112                   | 0.028                               | 0.055                  | 0.010                              | 1.22         | 0.22                     | 28                       | 29                      | 24            |
| TPSSH_ZORA_SVP            | SARC-ZORA-TZVP | ZORA-def2-SVP    | ZORA          | ---        | ---        | 0.115                   | 0.029                               | 0.056                  | 0.009                              | 1.15         | 0.18                     | 33                       | 30                      | 19            |
| PBE_ZORA_SVP_D3BJ         | SARC-ZORA-TZVP | ZORA-def2-SVP    | ZORA          | ---        | D3BJ       | 0.104                   | 0.018                               | 0.056                  | 0.009                              | 1.18         | 0.21                     | 21                       | 31                      | 20            |

|                           |                |                |      |            |      |       |       |       |       |       |      |    |    |    |
|---------------------------|----------------|----------------|------|------------|------|-------|-------|-------|-------|-------|------|----|----|----|
| B3LYP_ZORA_TZVP_D3BJ      | SARC-ZORA-TZVP | ZORA-def2-TZVP | ZORA | ---        | D3BJ | 0.114 | 0.028 | 0.056 | 0.008 | 1.44  | 0.25 | 30 | 32 | 31 |
| B3LYP_ZORA_SVP_CPCM       | SARC-ZORA-TZVP | ZORA-def2-SVP  | ZORA | CPCM (inf) | ---  | 0.085 | 0.011 | 0.057 | 0.008 | 1.81  | 0.19 | 17 | 33 | 39 |
| BP86_ZORA_SVP_D3BJ        | SARC-ZORA-TZVP | ZORA-def2-SVP  | ZORA | ---        | D3BJ | 0.118 | 0.029 | 0.057 | 0.009 | 1.23  | 0.23 | 37 | 34 | 25 |
| BP86_ZORA_TZVP            | SARC-ZORA-TZVP | ZORA-def2-TZVP | ZORA | ---        | ---  | 0.116 | 0.029 | 0.058 | 0.009 | 1.40  | 0.24 | 35 | 35 | 30 |
| PBE_ZORA_SVP              | SARC-ZORA-TZVP | ZORA-def2-SVP  | ZORA | ---        | ---  | 0.117 | 0.029 | 0.058 | 0.009 | 1.29  | 0.22 | 36 | 36 | 28 |
| B3LYP_ZORA_SVP_D3BJ       | SARC-ZORA-TZVP | ZORA-def2-SVP  | ZORA | ---        | D3BJ | 0.121 | 0.030 | 0.059 | 0.008 | 1.48  | 0.25 | 38 | 37 | 34 |
| BP86_ZORA_SVP             | SARC-ZORA-TZVP | ZORA-def2-SVP  | ZORA | ---        | ---  | 0.121 | 0.029 | 0.061 | 0.009 | 1.45  | 0.24 | 39 | 38 | 32 |
| B3LYP_ZORA_TZVP           | SARC-ZORA-TZVP | ZORA-def2-TZVP | ZORA | ---        | ---  | 0.116 | 0.026 | 0.061 | 0.008 | 1.73  | 0.27 | 34 | 39 | 37 |
| B3LYP_ZORA_SVP            | SARC-ZORA-TZVP | ZORA-def2-SVP  | ZORA | ---        | ---  | 0.122 | 0.028 | 0.063 | 0.008 | 1.76  | 0.25 | 40 | 40 | 38 |
| BP86_DKH2_TZVP_D3BJ_CPCM  | SARC-DKH-TZVP  | DKH-def2-TZVP  | DKH2 | CPCM (inf) | D3BJ | 0.213 | 0.041 | 0.127 | 0.013 | 4.53  | 0.30 | 44 | 41 | 47 |
| PBE0_DKH2_TZVP_D3BJ_CPCM  | SARC-DKH-TZVP  | DKH-def2-TZVP  | DKH2 | CPCM (inf) | D3BJ | 0.242 | 0.056 | 0.127 | 0.013 | 4.42  | 0.38 | 55 | 42 | 42 |
| PBE_DKH2_TZVP_D3BJ_CPCM   | SARC-DKH-TZVP  | DKH-def2-TZVP  | DKH2 | CPCM (inf) | D3BJ | 0.211 | 0.040 | 0.127 | 0.014 | 4.54  | 0.31 | 41 | 43 | 48 |
| PBE0_DKH2_TZVP_CPCM       | SARC-DKH-TZVP  | DKH-def2-TZVP  | DKH2 | CPCM (inf) | ---  | 0.212 | 0.041 | 0.127 | 0.012 | 4.49  | 0.40 | 43 | 44 | 43 |
| TPSSh_DKH2_TZVP_CPCM      | SARC-DKH-TZVP  | DKH-def2-TZVP  | DKH2 | CPCM (inf) | ---  | 0.215 | 0.042 | 0.128 | 0.013 | 4.66  | 0.33 | 46 | 45 | 53 |
| TPSSh_DKH2_TZVP_D3BJ_CPCM | SARC-DKH-TZVP  | DKH-def2-TZVP  | DKH2 | CPCM (inf) | D3BJ | 0.235 | 0.051 | 0.129 | 0.013 | 4.55  | 0.33 | 53 | 46 | 49 |
| PBE0_DKH2_TZVP_D3BJ       | SARC-DKH-TZVP  | DKH-def2-TZVP  | DKH2 | ---        | D3BJ | 0.225 | 0.053 | 0.129 | 0.014 | 4.42  | 0.37 | 48 | 47 | 41 |
| BP86_DKH2_TZVP_D3BJ       | SARC-DKH-TZVP  | DKH-def2-TZVP  | DKH2 | ---        | D3BJ | 0.211 | 0.042 | 0.130 | 0.015 | 4.52  | 0.28 | 42 | 48 | 46 |
| B3LYP_DKH2_TZVP_D3BJ_CPCM | SARC-DKH-TZVP  | DKH-def2-TZVP  | DKH2 | CPCM (inf) | D3BJ | 0.245 | 0.056 | 0.130 | 0.013 | 4.77  | 0.36 | 58 | 49 | 57 |
| TPSSh_DKH2_TZVP           | SARC-DKH-TZVP  | DKH-def2-TZVP  | DKH2 | ---        | ---  | 0.234 | 0.058 | 0.133 | 0.014 | 4.66  | 0.32 | 52 | 50 | 54 |
| PBE0_DKH2_TZVP            | SARC-DKH-TZVP  | DKH-def2-TZVP  | DKH2 | ---        | ---  | 0.232 | 0.055 | 0.133 | 0.014 | 4.51  | 0.37 | 50 | 51 | 44 |
| B3LYP_DKH2_TZVP_D3BJ      | SARC-DKH-TZVP  | DKH-def2-TZVP  | DKH2 | ---        | D3BJ | 0.232 | 0.056 | 0.133 | 0.015 | 4.84  | 0.34 | 51 | 52 | 58 |
| TPSSh_DKH2_TZVP_D3BJ      | SARC-DKH-TZVP  | DKH-def2-TZVP  | DKH2 | ---        | D3BJ | 0.244 | 0.057 | 0.133 | 0.015 | 4.58  | 0.32 | 57 | 53 | 50 |
| PBE_DKH2_TZVP_D3BJ        | SARC-DKH-TZVP  | DKH-def2-TZVP  | DKH2 | ---        | D3BJ | 0.243 | 0.058 | 0.134 | 0.014 | 4.52  | 0.29 | 56 | 54 | 45 |
| B3LYP_DKH2_TZVP_CPCM      | SARC-DKH-TZVP  | DKH-def2-TZVP  | DKH2 | CPCM (inf) | ---  | 0.253 | 0.060 | 0.134 | 0.013 | 4.94  | 0.37 | 60 | 55 | 59 |
| PBE_DKH2_TZVP_CPCM        | SARC-DKH-TZVP  | DKH-def2-TZVP  | DKH2 | CPCM (inf) | ---  | 0.221 | 0.041 | 0.134 | 0.014 | 4.65  | 0.31 | 47 | 56 | 52 |
| BP86_DKH2_TZVP_CPCM       | SARC-DKH-TZVP  | DKH-def2-TZVP  | DKH2 | CPCM (inf) | ---  | 0.214 | 0.038 | 0.134 | 0.014 | 4.70  | 0.30 | 45 | 57 | 55 |
| BP86_DKH2_TZVP            | SARC-DKH-TZVP  | DKH-def2-TZVP  | DKH2 | ---        | ---  | 0.231 | 0.056 | 0.135 | 0.015 | 4.70  | 0.30 | 49 | 58 | 56 |
| B3LYP_DKH2_TZVP           | SARC-DKH-TZVP  | DKH-def2-TZVP  | DKH2 | ---        | ---  | 0.239 | 0.059 | 0.137 | 0.014 | 4.98  | 0.37 | 54 | 59 | 60 |
| PBE_DKH2_TZVP             | SARC-DKH-TZVP  | DKH-def2-TZVP  | DKH2 | ---        | ---  | 0.249 | 0.056 | 0.137 | 0.016 | 4.62  | 0.29 | 59 | 60 | 51 |
| B3LYP_DKH2_SVP            | SARC-DKH-TZVP  | DKH-def2-SVP   | DKH2 | ---        | ---  | 0.420 | 0.094 | 0.265 | 0.037 | 11.47 | 1.81 | 65 | 61 | 79 |
| TPSSh_DKH2_SVP            | SARC-DKH-TZVP  | DKH-def2-SVP   | DKH2 | ---        | ---  | 0.420 | 0.086 | 0.266 | 0.034 | 11.04 | 1.70 | 64 | 62 | 74 |
| TPSSh_DKH2_SVP_D3BJ       | SARC-DKH-TZVP  | DKH-def2-SVP   | DKH2 | ---        | D3BJ | 0.394 | 0.082 | 0.266 | 0.035 | 11.10 | 1.68 | 62 | 63 | 76 |
| PBE0_DKH2_SVP_D3BJ        | SARC-DKH-TZVP  | DKH-def2-SVP   | DKH2 | ---        | D3BJ | 0.446 | 0.102 | 0.273 | 0.035 | 11.19 | 1.67 | 70 | 64 | 77 |
| B3LYP_DKH2_SVP_D3BJ       | SARC-DKH-TZVP  | DKH-def2-SVP   | DKH2 | ---        | D3BJ | 0.428 | 0.091 | 0.278 | 0.036 | 11.08 | 1.64 | 67 | 65 | 75 |
| PBE0_DKH2_SVP             | SARC-DKH-TZVP  | DKH-def2-SVP   | DKH2 | ---        | ---  | 0.438 | 0.099 | 0.278 | 0.036 | 11.24 | 1.65 | 68 | 66 | 78 |
| BP86_DKH2_SVP             | SARC-DKH-TZVP  | DKH-def2-SVP   | DKH2 | ---        | ---  | 0.441 | 0.095 | 0.306 | 0.053 | 10.57 | 1.70 | 69 | 67 | 69 |
| BP86_DKH2_SVP_D3BJ        | SARC-DKH-TZVP  | DKH-def2-SVP   | DKH2 | ---        | D3BJ | 0.382 | 0.054 | 0.319 | 0.055 | 9.92  | 1.61 | 61 | 68 | 62 |



Table S3: RMSD<sub>all</sub>, RMSD<sub>pt</sub> and  $\Delta$  ranking of the 80 different methods for complexes with platinum in oxidation state +2 (1, 3, 5, 7, 8, 10, 11, 13, 14)

| Name                      | Pt Basis Set   | Ligand Basis Set | Relativistics | Solvation  | Dispersion | RMSD <sub>all</sub> (Å) | Variance of RMSD <sub>all</sub> (Å) | RMSD <sub>pt</sub> (Å) | Variance of RMSD <sub>pt</sub> (Å) | $\Delta$ (%) | Variance of $\Delta$ (%) | RMSD <sub>all</sub> rank | RMSD <sub>pt</sub> rank | $\Delta$ rank |
|---------------------------|----------------|------------------|---------------|------------|------------|-------------------------|-------------------------------------|------------------------|------------------------------------|--------------|--------------------------|--------------------------|-------------------------|---------------|
| PBE0_ZORA_TZVP_D3BJ_CPCM  | SARC-ZORA-TZVP | ZORA-def2-TZVP   | ZORA          | CPCM (inf) | D3BJ       | 0.059                   | 0.017                               | 0.026                  | 0.007                              | 0.47         | 0.12                     | 1*                       | 1*                      | 1*            |
| PBE0_ZORA_TZVP_CPCM       | SARC-ZORA-TZVP | ZORA-def2-TZVP   | ZORA          | CPCM (inf) | ---        | 0.060                   | 0.016                               | 0.027                  | 0.007                              | 0.48         | 0.12                     | 2*                       | 2*                      | 2*            |
| TPSSH_ZORA_TZVP_D3BJ_CPCM | SARC-ZORA-TZVP | ZORA-def2-TZVP   | ZORA          | CPCM (inf) | D3BJ       | 0.063                   | 0.016                               | 0.029                  | 0.007                              | 0.70         | 0.10                     | 5*                       | 3*                      | 5             |
| PBE0_ZORA_SVP_D3BJ_CPCM   | SARC-ZORA-TZVP | ZORA-def2-SVP    | ZORA          | CPCM (inf) | D3BJ       | 0.061                   | 0.015                               | 0.029                  | 0.007                              | 0.54         | 0.12                     | 3*                       | 4*                      | 3*            |
| TPSSH_ZORA_TZVP_CPCM      | SARC-ZORA-TZVP | ZORA-def2-TZVP   | ZORA          | CPCM (inf) | ---        | 0.062                   | 0.014                               | 0.030                  | 0.007                              | 0.81         | 0.10                     | 4*                       | 5*                      | 6             |
| PBE_ZORA_TZVP_D3BJ_CPCM   | SARC-ZORA-TZVP | ZORA-def2-TZVP   | ZORA          | CPCM (inf) | D3BJ       | 0.069                   | 0.015                               | 0.030                  | 0.007                              | 0.85         | 0.10                     | 9*                       | 6*                      | 8             |
| TPSSH_ZORA_SVP_D3BJ_CPCM  | SARC-ZORA-TZVP | ZORA-def2-SVP    | ZORA          | CPCM (inf) | D3BJ       | 0.065                   | 0.015                               | 0.032                  | 0.006                              | 0.84         | 0.14                     | 7*                       | 7*                      | 7             |
| PBE_ZORA_TZVP_CPCM        | SARC-ZORA-TZVP | ZORA-def2-TZVP   | ZORA          | CPCM (inf) | ---        | 0.068                   | 0.014                               | 0.032                  | 0.007                              | 0.98         | 0.11                     | 8*                       | 8*                      | 26            |
| BP86_ZORA_TZVP_D3BJ_CPCM  | SARC-ZORA-TZVP | ZORA-def2-TZVP   | ZORA          | CPCM (inf) | D3BJ       | 0.124                   | 0.055                               | 0.032                  | 0.007                              | 0.91         | 0.11                     | 31                       | 9*                      | 16            |
| PBE_ZORA_SVP_D3BJ_CPCM    | SARC-ZORA-TZVP | ZORA-def2-SVP    | ZORA          | CPCM (inf) | D3BJ       | 0.069                   | 0.014                               | 0.033                  | 0.007                              | 0.95         | 0.14                     | 10*                      | 10*                     | 22            |
| BP86_ZORA_TZVP_CPCM       | SARC-ZORA-TZVP | ZORA-def2-TZVP   | ZORA          | CPCM (inf) | ---        | 0.070                   | 0.015                               | 0.034                  | 0.007                              | 1.16         | 0.12                     | 12*                      | 11                      | 32            |
| TPSSH_ZORA_SVP_CPCM       | SARC-ZORA-TZVP | ZORA-def2-SVP    | ZORA          | CPCM (inf) | ---        | 0.065                   | 0.013                               | 0.034                  | 0.006                              | 0.98         | 0.14                     | 6*                       | 12                      | 25            |
| PBE_ZORA_SVP_CPCM         | SARC-ZORA-TZVP | ZORA-def2-SVP    | ZORA          | CPCM (inf) | ---        | 0.069                   | 0.014                               | 0.035                  | 0.007                              | 1.09         | 0.14                     | 11*                      | 13                      | 30            |
| BP86_ZORA_SVP_D3BJ_CPCM   | SARC-ZORA-TZVP | ZORA-def2-SVP    | ZORA          | CPCM (inf) | D3BJ       | 0.073                   | 0.015                               | 0.036                  | 0.007                              | 1.00         | 0.14                     | 16*                      | 14                      | 28            |
| BP86_ZORA_SVP_CPCM        | SARC-ZORA-TZVP | ZORA-def2-SVP    | ZORA          | CPCM (inf) | ---        | 0.073                   | 0.013                               | 0.040                  | 0.007                              | 1.26         | 0.16                     | 15*                      | 15                      | 34            |
| PBE0_ZORA_SVP_CPCM        | SARC-ZORA-TZVP | ZORA-def2-SVP    | ZORA          | CPCM (inf) | ---        | 0.134                   | 0.078                               | 0.040                  | 0.010                              | 0.62         | 0.11                     | 40                       | 16                      | 4             |
| B3LYP_ZORA_TZVP_D3BJ_CPCM | SARC-ZORA-TZVP | ZORA-def2-TZVP   | ZORA          | CPCM (inf) | D3BJ       | 0.073                   | 0.016                               | 0.041                  | 0.006                              | 1.39         | 0.11                     | 14*                      | 17                      | 36            |
| B3LYP_ZORA_SVP_D3BJ_CPCM  | SARC-ZORA-TZVP | ZORA-def2-SVP    | ZORA          | CPCM (inf) | D3BJ       | 0.072                   | 0.014                               | 0.042                  | 0.006                              | 1.40         | 0.14                     | 13*                      | 18                      | 37            |
| PBE0_ZORA_TZVP_D3BJ       | SARC-ZORA-TZVP | ZORA-def2-TZVP   | ZORA          | ---        | D3BJ       | 0.114                   | 0.041                               | 0.044                  | 0.010                              | 0.94         | 0.15                     | 20                       | 19                      | 21            |
| PBE0_ZORA_TZVP            | SARC-ZORA-TZVP | ZORA-def2-TZVP   | ZORA          | ---        | ---        | 0.119                   | 0.042                               | 0.045                  | 0.010                              | 0.90         | 0.15                     | 24                       | 20                      | 12            |
| TPSSH_ZORA_TZVP_D3BJ      | SARC-ZORA-TZVP | ZORA-def2-TZVP   | ZORA          | ---        | D3BJ       | 0.116                   | 0.041                               | 0.045                  | 0.010                              | 0.90         | 0.19                     | 21                       | 21                      | 15            |
| BP86_ZORA_TZVP_D3BJ       | SARC-ZORA-TZVP | ZORA-def2-TZVP   | ZORA          | ---        | D3BJ       | 0.117                   | 0.042                               | 0.045                  | 0.011                              | 0.91         | 0.21                     | 22                       | 22                      | 17            |
| B3LYP_ZORA_TZVP_CPCM      | SARC-ZORA-TZVP | ZORA-def2-TZVP   | ZORA          | CPCM (inf) | ---        | 0.077                   | 0.015                               | 0.045                  | 0.006                              | 1.69         | 0.14                     | 18                       | 23                      | 40            |
| PBE_ZORA_TZVP_D3BJ        | SARC-ZORA-TZVP | ZORA-def2-TZVP   | ZORA          | ---        | D3BJ       | 0.119                   | 0.042                               | 0.045                  | 0.011                              | 0.87         | 0.19                     | 25                       | 24                      | 9             |
| PBE0_ZORA_SVP_D3BJ        | SARC-ZORA-TZVP | ZORA-def2-SVP    | ZORA          | ---        | D3BJ       | 0.123                   | 0.044                               | 0.046                  | 0.010                              | 0.94         | 0.15                     | 30                       | 25                      | 20            |
| TPSSH_ZORA_TZVP           | SARC-ZORA-TZVP | ZORA-def2-TZVP   | ZORA          | ---        | ---        | 0.119                   | 0.041                               | 0.047                  | 0.010                              | 0.88         | 0.20                     | 26                       | 26                      | 11            |
| PBE_ZORA_TZVP             | SARC-ZORA-TZVP | ZORA-def2-TZVP   | ZORA          | ---        | ---        | 0.120                   | 0.043                               | 0.047                  | 0.010                              | 0.88         | 0.20                     | 27                       | 27                      | 10            |
| PBE0_ZORA_SVP             | SARC-ZORA-TZVP | ZORA-def2-SVP    | ZORA          | ---        | ---        | 0.125                   | 0.043                               | 0.048                  | 0.010                              | 0.92         | 0.14                     | 32                       | 28                      | 19            |
| BP86_ZORA_TZVP            | SARC-ZORA-TZVP | ZORA-def2-TZVP   | ZORA          | ---        | ---        | 0.122                   | 0.042                               | 0.048                  | 0.011                              | 0.99         | 0.22                     | 29                       | 29                      | 27            |
| BP86_ZORA_SVP_D3BJ        | SARC-ZORA-TZVP | ZORA-def2-SVP    | ZORA          | ---        | D3BJ       | 0.128                   | 0.044                               | 0.048                  | 0.011                              | 0.92         | 0.21                     | 37                       | 30                      | 18            |
| TPSSH_ZORA_SVP_D3BJ       | SARC-ZORA-TZVP | ZORA-def2-SVP    | ZORA          | ---        | D3BJ       | 0.128                   | 0.044                               | 0.048                  | 0.010                              | 0.90         | 0.21                     | 35                       | 31                      | 14            |
| B3LYP_ZORA_SVP_CPCM       | SARC-ZORA-TZVP | ZORA-def2-SVP    | ZORA          | CPCM (inf) | ---        | 0.074                   | 0.013                               | 0.049                  | 0.006                              | 1.69         | 0.17                     | 17*                      | 32                      | 39            |
| PBE_ZORA_SVP_D3BJ         | SARC-ZORA-TZVP | ZORA-def2-SVP    | ZORA          | ---        | D3BJ       | 0.107                   | 0.027                               | 0.049                  | 0.012                              | 0.90         | 0.20                     | 19                       | 33                      | 13            |

|                           |                |                |      |            |      |       |       |       |       |       |      |    |    |    |
|---------------------------|----------------|----------------|------|------------|------|-------|-------|-------|-------|-------|------|----|----|----|
| B3LYP_ZORA_TZVP_D3BJ      | SARC-ZORA-TZVP | ZORA-def2-TZVP | ZORA | ---        | D3BJ | 0.118 | 0.040 | 0.050 | 0.010 | 1.14  | 0.26 | 23 | 34 | 31 |
| PBE_ZORA_SVP              | SARC-ZORA-TZVP | ZORA-def2-SVP  | ZORA | ---        | ---  | 0.126 | 0.043 | 0.050 | 0.011 | 0.97  | 0.19 | 33 | 35 | 24 |
| TPSSH_ZORA_SVP            | SARC-ZORA-TZVP | ZORA-def2-SVP  | ZORA | ---        | ---  | 0.126 | 0.042 | 0.050 | 0.010 | 0.96  | 0.20 | 34 | 36 | 23 |
| BP86_ZORA_SVP             | SARC-ZORA-TZVP | ZORA-def2-SVP  | ZORA | ---        | ---  | 0.128 | 0.043 | 0.051 | 0.011 | 1.07  | 0.21 | 36 | 37 | 29 |
| B3LYP_ZORA_SVP_D3BJ       | SARC-ZORA-TZVP | ZORA-def2-SVP  | ZORA | ---        | D3BJ | 0.129 | 0.042 | 0.052 | 0.009 | 1.19  | 0.26 | 38 | 38 | 33 |
| B3LYP_ZORA_TZVP           | SARC-ZORA-TZVP | ZORA-def2-TZVP | ZORA | ---        | ---  | 0.122 | 0.038 | 0.054 | 0.009 | 1.37  | 0.25 | 28 | 39 | 35 |
| B3LYP_ZORA_SVP            | SARC-ZORA-TZVP | ZORA-def2-SVP  | ZORA | ---        | ---  | 0.131 | 0.043 | 0.057 | 0.009 | 1.45  | 0.26 | 39 | 40 | 38 |
| BP86_DKH2_TZVP_D3BJ_CPCM  | SARC-DKH-TZVP  | DKH-def2-TZVP  | DKH2 | CPCM (inf) | D3BJ | 0.232 | 0.050 | 0.131 | 0.016 | 4.77  | 0.37 | 44 | 41 | 47 |
| TPSSH_DKH2_TZVP_CPCM      | SARC-DKH-TZVP  | DKH-def2-TZVP  | DKH2 | CPCM (inf) | ---  | 0.233 | 0.054 | 0.131 | 0.015 | 4.98  | 0.42 | 45 | 42 | 56 |
| PBE0_DKH2_TZVP_CPCM       | SARC-DKH-TZVP  | DKH-def2-TZVP  | DKH2 | CPCM (inf) | ---  | 0.230 | 0.054 | 0.132 | 0.016 | 4.78  | 0.48 | 42 | 43 | 48 |
| PBE_DKH2_TZVP_CPCM        | SARC-DKH-TZVP  | DKH-def2-TZVP  | DKH2 | CPCM (inf) | ---  | 0.231 | 0.052 | 0.132 | 0.017 | 4.90  | 0.37 | 43 | 44 | 52 |
| PBE_DKH2_TZVP_D3BJ_CPCM   | SARC-DKH-TZVP  | DKH-def2-TZVP  | DKH2 | CPCM (inf) | D3BJ | 0.230 | 0.053 | 0.133 | 0.016 | 4.75  | 0.38 | 41 | 45 | 46 |
| BP86_DKH2_TZVP_CPCM       | SARC-DKH-TZVP  | DKH-def2-TZVP  | DKH2 | CPCM (inf) | ---  | 0.236 | 0.052 | 0.134 | 0.016 | 4.98  | 0.37 | 46 | 46 | 55 |
| BP86_DKH2_TZVP_D3BJ       | SARC-DKH-TZVP  | DKH-def2-TZVP  | DKH2 | ---        | D3BJ | 0.239 | 0.054 | 0.135 | 0.018 | 4.72  | 0.38 | 47 | 47 | 44 |
| PBE0_DKH2_TZVP_D3BJ_CPCM  | SARC-DKH-TZVP  | DKH-def2-TZVP  | DKH2 | CPCM (inf) | D3BJ | 0.274 | 0.076 | 0.136 | 0.017 | 4.64  | 0.46 | 49 | 48 | 41 |
| TPSSH_DKH2_TZVP_D3BJ_CPCM | SARC-DKH-TZVP  | DKH-def2-TZVP  | DKH2 | CPCM (inf) | D3BJ | 0.265 | 0.069 | 0.136 | 0.017 | 4.82  | 0.43 | 48 | 49 | 50 |
| B3LYP_DKH2_TZVP_D3BJ_CPCM | SARC-DKH-TZVP  | DKH-def2-TZVP  | DKH2 | CPCM (inf) | D3BJ | 0.281 | 0.079 | 0.140 | 0.016 | 5.11  | 0.42 | 50 | 50 | 57 |
| PBE0_DKH2_TZVP_D3BJ       | SARC-DKH-TZVP  | DKH-def2-TZVP  | DKH2 | ---        | D3BJ | 0.281 | 0.077 | 0.142 | 0.020 | 4.67  | 0.47 | 51 | 51 | 42 |
| TPSSH_DKH2_TZVP_D3BJ      | SARC-DKH-TZVP  | DKH-def2-TZVP  | DKH2 | ---        | D3BJ | 0.285 | 0.079 | 0.142 | 0.020 | 4.78  | 0.43 | 52 | 52 | 49 |
| PBE0_DKH2_TZVP            | SARC-DKH-TZVP  | DKH-def2-TZVP  | DKH2 | ---        | ---  | 0.295 | 0.083 | 0.144 | 0.018 | 4.74  | 0.46 | 58 | 53 | 45 |
| PBE_DKH2_TZVP_D3BJ        | SARC-DKH-TZVP  | DKH-def2-TZVP  | DKH2 | ---        | D3BJ | 0.287 | 0.081 | 0.144 | 0.020 | 4.71  | 0.37 | 53 | 54 | 43 |
| TPSSH_DKH2_TZVP           | SARC-DKH-TZVP  | DKH-def2-TZVP  | DKH2 | ---        | ---  | 0.288 | 0.082 | 0.144 | 0.020 | 4.95  | 0.41 | 54 | 55 | 54 |
| BP86_DKH2_TZVP            | SARC-DKH-TZVP  | DKH-def2-TZVP  | DKH2 | ---        | ---  | 0.294 | 0.083 | 0.144 | 0.019 | 4.94  | 0.36 | 57 | 56 | 53 |
| B3LYP_DKH2_TZVP_CPCM      | SARC-DKH-TZVP  | DKH-def2-TZVP  | DKH2 | CPCM (inf) | ---  | 0.296 | 0.085 | 0.145 | 0.016 | 5.33  | 0.45 | 59 | 57 | 59 |
| B3LYP_DKH2_TZVP_D3BJ      | SARC-DKH-TZVP  | DKH-def2-TZVP  | DKH2 | ---        | D3BJ | 0.289 | 0.079 | 0.146 | 0.019 | 5.20  | 0.38 | 55 | 58 | 58 |
| PBE_DKH2_TZVP             | SARC-DKH-TZVP  | DKH-def2-TZVP  | DKH2 | ---        | ---  | 0.292 | 0.086 | 0.147 | 0.021 | 4.83  | 0.35 | 56 | 59 | 51 |
| B3LYP_DKH2_TZVP           | SARC-DKH-TZVP  | DKH-def2-TZVP  | DKH2 | ---        | ---  | 0.296 | 0.084 | 0.151 | 0.018 | 5.37  | 0.46 | 60 | 60 | 60 |
| TPSSH_DKH2_SVP            | SARC-DKH-TZVP  | DKH-def2-SVP   | DKH2 | ---        | ---  | 0.484 | 0.133 | 0.263 | 0.036 | 11.20 | 1.86 | 75 | 61 | 73 |
| TPSSH_DKH2_SVP_CPCM       | SARC-DKH-TZVP  | DKH-def2-SVP   | DKH2 | CPCM (inf) | ---  | 0.491 | 0.129 | 0.263 | 0.039 | 11.09 | 1.78 | 76 | 62 | 72 |
| BP86_DKH2_SVP_D3BJ        | SARC-DKH-TZVP  | DKH-def2-SVP   | DKH2 | ---        | D3BJ | 0.366 | 0.065 | 0.264 | 0.039 | 10.17 | 1.55 | 61 | 63 | 65 |
| TPSSH_DKH2_SVP_D3BJ       | SARC-DKH-TZVP  | DKH-def2-SVP   | DKH2 | ---        | D3BJ | 0.453 | 0.122 | 0.264 | 0.038 | 11.33 | 1.75 | 72 | 64 | 74 |
| B3LYP_DKH2_SVP            | SARC-DKH-TZVP  | DKH-def2-SVP   | DKH2 | ---        | ---  | 0.500 | 0.145 | 0.267 | 0.041 | 12.08 | 2.16 | 77 | 65 | 79 |
| B3LYP_DKH2_SVP_D3BJ       | SARC-DKH-TZVP  | DKH-def2-SVP   | DKH2 | ---        | D3BJ | 0.478 | 0.147 | 0.267 | 0.040 | 11.56 | 1.81 | 74 | 66 | 78 |
| PBE0_DKH2_SVP_D3BJ        | SARC-DKH-TZVP  | DKH-def2-SVP   | DKH2 | ---        | D3BJ | 0.530 | 0.146 | 0.268 | 0.036 | 11.53 | 1.75 | 79 | 67 | 77 |
| BP86_DKH2_SVP             | SARC-DKH-TZVP  | DKH-def2-SVP   | DKH2 | ---        | ---  | 0.457 | 0.135 | 0.269 | 0.043 | 11.35 | 1.88 | 73 | 68 | 75 |
| PBE_DKH2_SVP_D3BJ         | SARC-DKH-TZVP  | DKH-def2-SVP   | DKH2 | ---        | D3BJ | 0.376 | 0.066 | 0.269 | 0.038 | 10.22 | 1.64 | 62 | 69 | 68 |
| PBE0_DKH2_SVP             | SARC-DKH-TZVP  | DKH-def2-SVP   | DKH2 | ---        | ---  | 0.517 | 0.142 | 0.276 | 0.042 | 11.43 | 1.82 | 78 | 70 | 76 |

|                          |               |              |      |            |      |       |       |       |       |       |      |    |    |    |
|--------------------------|---------------|--------------|------|------------|------|-------|-------|-------|-------|-------|------|----|----|----|
| BP86_DKH2_SVP_CPCM       | SARC-DKH-TZVP | DKH-def2-SVP | DKH2 | CPCM (inf) | ---  | 0.392 | 0.079 | 0.276 | 0.045 | 10.20 | 1.53 | 63 | 71 | 67 |
| BP86_DKH2_SVP_D3BJ_CPCM  | SARC-DKH-TZVP | DKH-def2-SVP | DKH2 | CPCM (inf) | D3BJ | 0.413 | 0.065 | 0.278 | 0.028 | 9.97  | 1.52 | 66 | 72 | 62 |
| PBE_DKH2_SVP_D3BJ_CPCM   | SARC-DKH-TZVP | DKH-def2-SVP | DKH2 | CPCM (inf) | D3BJ | 0.398 | 0.072 | 0.279 | 0.038 | 9.76  | 1.55 | 64 | 73 | 61 |
| TPSSh_DKH2_SVP_D3BJ_CPCM | SARC-DKH-TZVP | DKH-def2-SVP | DKH2 | CPCM (inf) | D3BJ | 0.437 | 0.073 | 0.281 | 0.030 | 10.18 | 1.54 | 68 | 74 | 66 |
| PBE0_DKH2_SVP_D3BJ_CPCM  | SARC-DKH-TZVP | DKH-def2-SVP | DKH2 | CPCM (inf) | D3BJ | 0.425 | 0.066 | 0.284 | 0.027 | 10.37 | 1.46 | 67 | 75 | 69 |
| PBE_DKH2_SVP_CPCM        | SARC-DKH-TZVP | DKH-def2-SVP | DKH2 | CPCM (inf) | ---  | 0.437 | 0.087 | 0.284 | 0.041 | 10.13 | 1.45 | 69 | 76 | 64 |
| PBE0_DKH2_SVP_CPCM       | SARC-DKH-TZVP | DKH-def2-SVP | DKH2 | CPCM (inf) | ---  | 0.450 | 0.080 | 0.288 | 0.029 | 10.48 | 1.45 | 70 | 77 | 71 |
| B3LYP_DKH2_SVP_D3BJ_CPCM | SARC-DKH-TZVP | DKH-def2-SVP | DKH2 | CPCM (inf) | D3BJ | 0.451 | 0.084 | 0.299 | 0.040 | 10.38 | 1.45 | 71 | 78 | 70 |
| B3LYP_DKH2_SVP_CPCM      | SARC-DKH-TZVP | DKH-def2-SVP | DKH2 | CPCM (inf) | ---  | 0.560 | 0.128 | 0.300 | 0.023 | 12.52 | 1.14 | 80 | 79 | 80 |
| PBE_DKH2_SVP             | SARC-DKH-TZVP | DKH-def2-SVP | DKH2 | ---        | ---  | 0.405 | 0.081 | 0.304 | 0.054 | 10.01 | 1.62 | 65 | 80 | 63 |

Table S4: RMSD<sub>all</sub>, RMSD<sub>Pt</sub> and  $\Delta$  ranking of the 80 different methods for complexes with platinum in oxidation state +4 (2, 4, 6, 9, 12)

| Name                      | Pt Basis Set   | Ligand Basis Set | Relativistics | Solvation  | Dispersion | RMSD <sub>all</sub> (Å) | Variance of RMSD <sub>all</sub> (Å) | RMSD <sub>Pt</sub> (Å) | Variance of RMSD <sub>Pt</sub> (Å) | $\Delta$ (%) | Variance of $\Delta$ (%) | RMSD <sub>all</sub> rank | RMSD <sub>Pt</sub> rank | $\Delta$ rank |
|---------------------------|----------------|------------------|---------------|------------|------------|-------------------------|-------------------------------------|------------------------|------------------------------------|--------------|--------------------------|--------------------------|-------------------------|---------------|
| PBE0_ZORA_TZVP_D3BJ       | SARC-ZORA-TZVP | ZORA-def2-TZVP   | ZORA          | ---        | D3BJ       | 0.071                   | 0.018                               | 0.044                  | 0.008                              | 1.04         | 0.25                     | 1*                       | 1*                      | 5*            |
| PBE0_ZORA_TZVP            | SARC-ZORA-TZVP | ZORA-def2-TZVP   | ZORA          | ---        | ---        | 0.072                   | 0.017                               | 0.045                  | 0.007                              | 1.08         | 0.27                     | 2*                       | 2*                      | 6*            |
| PBE0_ZORA_TZVP_CPCM       | SARC-ZORA-TZVP | ZORA-def2-TZVP   | ZORA          | CPCM (inf) | ---        | 0.074                   | 0.021                               | 0.045                  | 0.015                              | 0.93         | 0.29                     | 3*                       | 3*                      | 2*            |
| PBE0_ZORA_TZVP_D3BJ_CPCM  | SARC-ZORA-TZVP | ZORA-def2-TZVP   | ZORA          | CPCM (inf) | D3BJ       | 0.080                   | 0.025                               | 0.051                  | 0.021                              | 0.87         | 0.29                     | 4*                       | 4*                      | 1*            |
| PBE0_ZORA_SVP             | SARC-ZORA-TZVP | ZORA-def2-SVP    | ZORA          | ---        | ---        | 0.082                   | 0.019                               | 0.052                  | 0.012                              | 1.11         | 0.28                     | 5*                       | 5*                      | 8*            |
| PBE0_ZORA_SVP_CPCM        | SARC-ZORA-TZVP | ZORA-def2-SVP    | ZORA          | CPCM (inf) | ---        | 0.083                   | 0.025                               | 0.053                  | 0.021                              | 0.97         | 0.28                     | 7*                       | 6                       | 4*            |
| PBE0_ZORA_SVP_D3BJ_CPCM   | SARC-ZORA-TZVP | ZORA-def2-SVP    | ZORA          | CPCM (inf) | D3BJ       | 0.083                   | 0.026                               | 0.054                  | 0.021                              | 0.94         | 0.28                     | 6*                       | 7                       | 3*            |
| PBE0_ZORA_SVP_D3BJ        | SARC-ZORA-TZVP | ZORA-def2-SVP    | ZORA          | ---        | D3BJ       | 0.083                   | 0.021                               | 0.054                  | 0.015                              | 1.08         | 0.25                     | 8*                       | 8                       | 7*            |
| TPSSh_ZORA_TZVP_D3BJ_CPCM | SARC-ZORA-TZVP | ZORA-def2-TZVP   | ZORA          | CPCM (inf) | D3BJ       | 0.086                   | 0.023                               | 0.057                  | 0.020                              | 1.13         | 0.30                     | 9*                       | 9                       | 9*            |
| TPSSh_ZORA_TZVP_CPCM      | SARC-ZORA-TZVP | ZORA-def2-TZVP   | ZORA          | CPCM (inf) | ---        | 0.089                   | 0.022                               | 0.058                  | 0.019                              | 1.23         | 0.31                     | 10*                      | 10                      | 11*           |
| TPSSh_ZORA_TZVP           | SARC-ZORA-TZVP | ZORA-def2-TZVP   | ZORA          | ---        | ---        | 0.090                   | 0.017                               | 0.060                  | 0.012                              | 1.48         | 0.30                     | 11                       | 11                      | 16            |
| TPSSh_ZORA_SVP_CPCM       | SARC-ZORA-TZVP | ZORA-def2-SVP    | ZORA          | CPCM (inf) | ---        | 0.091                   | 0.022                               | 0.060                  | 0.020                              | 1.28         | 0.32                     | 12                       | 12                      | 12*           |
| TPSSh_ZORA_SVP_D3BJ_CPCM  | SARC-ZORA-TZVP | ZORA-def2-SVP    | ZORA          | CPCM (inf) | D3BJ       | 0.091                   | 0.026                               | 0.062                  | 0.023                              | 1.18         | 0.31                     | 14                       | 13                      | 10*           |
| PBE_ZORA_TZVP_D3BJ_CPCM   | SARC-ZORA-TZVP | ZORA-def2-TZVP   | ZORA          | CPCM (inf) | D3BJ       | 0.091                   | 0.021                               | 0.063                  | 0.018                              | 1.47         | 0.32                     | 13                       | 14                      | 15            |
| BP86_ZORA_TZVP_D3BJ_CPCM  | SARC-ZORA-TZVP | ZORA-def2-TZVP   | ZORA          | CPCM (inf) | D3BJ       | 0.093                   | 0.020                               | 0.064                  | 0.019                              | 1.53         | 0.33                     | 16                       | 15                      | 19            |
| TPSSh_ZORA_TZVP_D3BJ      | SARC-ZORA-TZVP | ZORA-def2-TZVP   | ZORA          | ---        | D3BJ       | 0.092                   | 0.021                               | 0.064                  | 0.017                              | 1.33         | 0.29                     | 15                       | 16                      | 13            |
| PBE_ZORA_TZVP_CPCM        | SARC-ZORA-TZVP | ZORA-def2-TZVP   | ZORA          | CPCM (inf) | ---        | 0.101                   | 0.022                               | 0.064                  | 0.018                              | 1.61         | 0.36                     | 28                       | 17                      | 22            |
| B3LYP_ZORA_TZVP_D3BJ_CPCM | SARC-ZORA-TZVP | ZORA-def2-TZVP   | ZORA          | CPCM (inf) | D3BJ       | 0.094                   | 0.020                               | 0.065                  | 0.017                              | 1.68         | 0.41                     | 21                       | 18                      | 23            |
| TPSSh_ZORA_SVP_D3BJ       | SARC-ZORA-TZVP | ZORA-def2-SVP    | ZORA          | ---        | D3BJ       | 0.096                   | 0.021                               | 0.065                  | 0.016                              | 1.37         | 0.30                     | 22                       | 19                      | 14            |
| PBE_ZORA_SVP_D3BJ_CPCM    | SARC-ZORA-TZVP | ZORA-def2-SVP    | ZORA          | CPCM (inf) | D3BJ       | 0.094                   | 0.021                               | 0.065                  | 0.019                              | 1.49         | 0.34                     | 18                       | 20                      | 17            |
| PBE_ZORA_TZVP_D3BJ        | SARC-ZORA-TZVP | ZORA-def2-TZVP   | ZORA          | ---        | D3BJ       | 0.094                   | 0.016                               | 0.066                  | 0.012                              | 1.73         | 0.36                     | 17                       | 21                      | 26            |
| B3LYP_ZORA_SVP_D3BJ_CPCM  | SARC-ZORA-TZVP | ZORA-def2-SVP    | ZORA          | CPCM (inf) | D3BJ       | 0.094                   | 0.019                               | 0.066                  | 0.017                              | 1.68         | 0.40                     | 20                       | 22                      | 24            |
| PBE_ZORA_TZVP             | SARC-ZORA-TZVP | ZORA-def2-TZVP   | ZORA          | ---        | ---        | 0.094                   | 0.014                               | 0.066                  | 0.010                              | 1.90         | 0.36                     | 19                       | 23                      | 32            |
| BP86_ZORA_SVP_D3BJ_CPCM   | SARC-ZORA-TZVP | ZORA-def2-SVP    | ZORA          | CPCM (inf) | D3BJ       | 0.096                   | 0.020                               | 0.067                  | 0.019                              | 1.57         | 0.35                     | 24                       | 24                      | 20            |
| PBE_ZORA_SVP_CPCM         | SARC-ZORA-TZVP | ZORA-def2-SVP    | ZORA          | CPCM (inf) | ---        | 0.097                   | 0.020                               | 0.067                  | 0.018                              | 1.61         | 0.36                     | 25                       | 25                      | 21            |
| BP86_ZORA_TZVP_CPCM       | SARC-ZORA-TZVP | ZORA-def2-TZVP   | ZORA          | CPCM (inf) | ---        | 0.102                   | 0.021                               | 0.067                  | 0.018                              | 1.82         | 0.38                     | 35                       | 26                      | 28            |
| TPSSh_ZORA_SVP            | SARC-ZORA-TZVP | ZORA-def2-SVP    | ZORA          | ---        | ---        | 0.097                   | 0.021                               | 0.068                  | 0.017                              | 1.50         | 0.30                     | 26                       | 27                      | 18            |
| B3LYP_ZORA_TZVP_D3BJ      | SARC-ZORA-TZVP | ZORA-def2-TZVP   | ZORA          | ---        | D3BJ       | 0.096                   | 0.015                               | 0.068                  | 0.011                              | 2.02         | 0.46                     | 23                       | 28                      | 34            |
| B3LYP_ZORA_TZVP_CPCM      | SARC-ZORA-TZVP | ZORA-def2-TZVP   | ZORA          | CPCM (inf) | ---        | 0.102                   | 0.018                               | 0.068                  | 0.016                              | 2.02         | 0.46                     | 34                       | 29                      | 36            |
| BP86_ZORA_SVP_CPCM        | SARC-ZORA-TZVP | ZORA-def2-SVP    | ZORA          | CPCM (inf) | ---        | 0.103                   | 0.020                               | 0.070                  | 0.018                              | 1.86         | 0.38                     | 36                       | 30                      | 31            |
| PBE_ZORA_SVP_D3BJ         | SARC-ZORA-TZVP | ZORA-def2-SVP    | ZORA          | ---        | D3BJ       | 0.100                   | 0.018                               | 0.071                  | 0.015                              | 1.70         | 0.37                     | 27                       | 31                      | 25            |
| B3LYP_ZORA_SVP_CPCM       | SARC-ZORA-TZVP | ZORA-def2-SVP    | ZORA          | CPCM (inf) | ---        | 0.102                   | 0.019                               | 0.071                  | 0.017                              | 2.02         | 0.44                     | 32                       | 32                      | 35            |
| PBE_ZORA_SVP              | SARC-ZORA-TZVP | ZORA-def2-SVP    | ZORA          | ---        | ---        | 0.101                   | 0.017                               | 0.072                  | 0.014                              | 1.86         | 0.37                     | 30                       | 33                      | 30            |

|                           |                |                |      |            |      |       |       |       |       |       |      |    |    |    |
|---------------------------|----------------|----------------|------|------------|------|-------|-------|-------|-------|-------|------|----|----|----|
| B3LYP_ZORA_SVP_D3BJ       | SARC-ZORA-TZVP | ZORA-def2-SVP  | ZORA | ---        | D3BJ | 0.101 | 0.017 | 0.073 | 0.015 | 1.99  | 0.44 | 29 | 34 | 33 |
| BP86_ZORA_SVP_D3BJ        | SARC-ZORA-TZVP | ZORA-def2-SVP  | ZORA | ---        | D3BJ | 0.102 | 0.019 | 0.073 | 0.016 | 1.82  | 0.39 | 33 | 35 | 27 |
| BP86_ZORA_TZVP_D3BJ       | SARC-ZORA-TZVP | ZORA-def2-TZVP | ZORA | ---        | D3BJ | 0.103 | 0.019 | 0.074 | 0.018 | 1.83  | 0.38 | 38 | 36 | 29 |
| B3LYP_ZORA_TZVP           | SARC-ZORA-TZVP | ZORA-def2-TZVP | ZORA | ---        | ---  | 0.101 | 0.014 | 0.074 | 0.012 | 2.37  | 0.46 | 31 | 37 | 40 |
| B3LYP_ZORA_SVP            | SARC-ZORA-TZVP | ZORA-def2-SVP  | ZORA | ---        | ---  | 0.103 | 0.014 | 0.074 | 0.013 | 2.32  | 0.47 | 37 | 38 | 39 |
| BP86_ZORA_TZVP            | SARC-ZORA-TZVP | ZORA-def2-TZVP | ZORA | ---        | ---  | 0.105 | 0.017 | 0.075 | 0.015 | 2.12  | 0.38 | 39 | 39 | 37 |
| BP86_ZORA_SVP             | SARC-ZORA-TZVP | ZORA-def2-SVP  | ZORA | ---        | ---  | 0.108 | 0.019 | 0.079 | 0.017 | 2.13  | 0.39 | 40 | 40 | 38 |
| B3LYP_DKH2_TZVP_D3BJ      | SARC-DKH-TZVP  | DKH-def2-TZVP  | DKH2 | ---        | D3BJ | 0.124 | 0.018 | 0.107 | 0.016 | 4.16  | 0.49 | 41 | 41 | 52 |
| PBE0_DKH2_TZVP_D3BJ       | SARC-DKH-TZVP  | DKH-def2-TZVP  | DKH2 | ---        | D3BJ | 0.126 | 0.017 | 0.108 | 0.015 | 3.99  | 0.55 | 43 | 42 | 41 |
| PBE0_DKH2_TZVP            | SARC-DKH-TZVP  | DKH-def2-TZVP  | DKH2 | ---        | ---  | 0.128 | 0.017 | 0.110 | 0.015 | 4.08  | 0.52 | 44 | 43 | 44 |
| B3LYP_DKH2_TZVP           | SARC-DKH-TZVP  | DKH-def2-TZVP  | DKH2 | ---        | ---  | 0.131 | 0.023 | 0.111 | 0.017 | 4.22  | 0.48 | 46 | 44 | 59 |
| TPSSH_DKH2_TZVP           | SARC-DKH-TZVP  | DKH-def2-TZVP  | DKH2 | ---        | ---  | 0.130 | 0.017 | 0.112 | 0.015 | 4.12  | 0.39 | 45 | 45 | 50 |
| B3LYP_DKH2_TZVP_D3BJ_CPCM | SARC-DKH-TZVP  | DKH-def2-TZVP  | DKH2 | CPCM (inf) | D3BJ | 0.171 | 0.059 | 0.113 | 0.020 | 4.12  | 0.53 | 47 | 46 | 49 |
| PBE0_DKH2_TZVP_D3BJ_CPCM  | SARC-DKH-TZVP  | DKH-def2-TZVP  | DKH2 | CPCM (inf) | D3BJ | 0.175 | 0.058 | 0.114 | 0.019 | 4.00  | 0.62 | 54 | 47 | 42 |
| BP86_DKH2_TZVP            | SARC-DKH-TZVP  | DKH-def2-TZVP  | DKH2 | ---        | ---  | 0.125 | 0.017 | 0.116 | 0.021 | 4.25  | 0.45 | 42 | 48 | 60 |
| B3LYP_DKH2_TZVP_CPCM      | SARC-DKH-TZVP  | DKH-def2-TZVP  | DKH2 | CPCM (inf) | ---  | 0.174 | 0.057 | 0.117 | 0.021 | 4.18  | 0.54 | 51 | 49 | 56 |
| PBE_DKH2_TZVP_D3BJ        | SARC-DKH-TZVP  | DKH-def2-TZVP  | DKH2 | ---        | D3BJ | 0.174 | 0.059 | 0.117 | 0.024 | 4.16  | 0.42 | 50 | 50 | 53 |
| TPSSH_DKH2_TZVP_D3BJ      | SARC-DKH-TZVP  | DKH-def2-TZVP  | DKH2 | ---        | D3BJ | 0.173 | 0.059 | 0.117 | 0.117 | 4.17  | 0.44 | 49 | 51 | 55 |
| TPSSH_DKH2_TZVP_D3BJ_CPCM | SARC-DKH-TZVP  | DKH-def2-TZVP  | DKH2 | CPCM (inf) | D3BJ | 0.183 | 0.062 | 0.118 | 0.020 | 4.08  | 0.50 | 57 | 52 | 45 |
| PBE_DKH2_TZVP_D3BJ_CPCM   | SARC-DKH-TZVP  | DKH-def2-TZVP  | DKH2 | CPCM (inf) | D3BJ | 0.174 | 0.060 | 0.119 | 0.021 | 4.10  | 0.47 | 53 | 53 | 46 |
| BP86_DKH2_TZVP_D3BJ_CPCM  | SARC-DKH-TZVP  | DKH-def2-TZVP  | DKH2 | CPCM (inf) | D3BJ | 0.177 | 0.061 | 0.119 | 0.022 | 4.11  | 0.47 | 55 | 54 | 48 |
| TPSSH_DKH2_TZVP_CPCM      | SARC-DKH-TZVP  | DKH-def2-TZVP  | DKH2 | CPCM (inf) | ---  | 0.182 | 0.060 | 0.119 | 0.020 | 4.11  | 0.47 | 56 | 55 | 47 |
| PBE_DKH2_TZVP             | SARC-DKH-TZVP  | DKH-def2-TZVP  | DKH2 | ---        | ---  | 0.174 | 0.060 | 0.120 | 0.024 | 4.21  | 0.43 | 52 | 56 | 58 |
| BP86_DKH2_TZVP_D3BJ       | SARC-DKH-TZVP  | DKH-def2-TZVP  | DKH2 | ---        | D3BJ | 0.172 | 0.057 | 0.120 | 0.023 | 4.19  | 0.44 | 48 | 57 | 57 |
| PBE0_DKH2_TZVP_CPCM       | SARC-DKH-TZVP  | DKH-def2-TZVP  | DKH2 | CPCM (inf) | ---  | 0.184 | 0.056 | 0.122 | 0.021 | 4.02  | 0.62 | 58 | 58 | 43 |
| BP86_DKH2_TZVP_CPCM       | SARC-DKH-TZVP  | DKH-def2-TZVP  | DKH2 | CPCM (inf) | ---  | 0.186 | 0.055 | 0.133 | 0.026 | 4.16  | 0.49 | 59 | 59 | 54 |
| PBE_DKH2_TZVP_CPCM        | SARC-DKH-TZVP  | DKH-def2-TZVP  | DKH2 | CPCM (inf) | ---  | 0.198 | 0.060 | 0.133 | 0.025 | 4.15  | 0.47 | 60 | 60 | 51 |
| B3LYP_DKH2_SVP            | SARC-DKH-TZVP  | DKH-def2-SVP   | DKH2 | ---        | ---  | 0.284 | 0.060 | 0.264 | 0.069 | 10.37 | 3.31 | 61 | 61 | 68 |
| TPSSH_DKH2_SVP            | SARC-DKH-TZVP  | DKH-def2-SVP   | DKH2 | ---        | ---  | 0.297 | 0.060 | 0.267 | 0.072 | 10.55 | 3.32 | 63 | 62 | 71 |
| TPSSH_DKH2_SVP_D3BJ       | SARC-DKH-TZVP  | DKH-def2-SVP   | DKH2 | ---        | D3BJ | 0.292 | 0.061 | 0.272 | 0.068 | 10.44 | 3.26 | 62 | 63 | 70 |
| PBE0_DKH2_SVP_D3BJ        | SARC-DKH-TZVP  | DKH-def2-SVP   | DKH2 | ---        | D3BJ | 0.301 | 0.063 | 0.281 | 0.074 | 11.02 | 3.19 | 64 | 64 | 75 |
| PBE0_DKH2_SVP             | SARC-DKH-TZVP  | DKH-def2-SVP   | DKH2 | ---        | ---  | 0.302 | 0.061 | 0.281 | 0.072 | 10.72 | 3.21 | 65 | 65 | 73 |
| B3LYP_DKH2_SVP_D3BJ       | SARC-DKH-TZVP  | DKH-def2-SVP   | DKH2 | ---        | D3BJ | 0.339 | 0.066 | 0.300 | 0.065 | 10.38 | 3.23 | 66 | 66 | 69 |
| BP86_DKH2_SVP             | SARC-DKH-TZVP  | DKH-def2-SVP   | DKH2 | ---        | ---  | 0.403 | 0.107 | 0.370 | 0.112 | 9.46  | 3.33 | 68 | 67 | 62 |
| PBE_DKH2_SVP              | SARC-DKH-TZVP  | DKH-def2-SVP   | DKH2 | ---        | ---  | 0.394 | 0.095 | 0.377 | 0.104 | 9.27  | 3.27 | 67 | 68 | 61 |
| BP86_DKH2_SVP_D3BJ        | SARC-DKH-TZVP  | DKH-def2-SVP   | DKH2 | ---        | D3BJ | 0.405 | 0.109 | 0.409 | 0.121 | 9.85  | 3.33 | 69 | 69 | 64 |
| PBE_DKH2_SVP_D3BJ         | SARC-DKH-TZVP  | DKH-def2-SVP   | DKH2 | ---        | D3BJ | 0.515 | 0.185 | 0.481 | 0.188 | 9.99  | 3.33 | 70 | 70 | 65 |



|                          |               |              |      |            |      |       |       |       |       |       |      |    |    |    |
|--------------------------|---------------|--------------|------|------------|------|-------|-------|-------|-------|-------|------|----|----|----|
| B3LYP_DKH2_SVP_D3BJ_CPCM | SARC-DKH-TZVP | DKH-def2-SVP | DKH2 | CPCM (inf) | D3BJ | 0.552 | 0.171 | 0.516 | 0.180 | 9.61  | 3.26 | 71 | 71 | 63 |
| BP86_DKH2_SVP_D3BJ_CPCM  | SARC-DKH-TZVP | DKH-def2-SVP | DKH2 | CPCM (inf) | D3BJ | 0.630 | 0.178 | 0.545 | 0.182 | 10.14 | 3.38 | 73 | 72 | 67 |
| BP86_DKH2_SVP_CPCM       | SARC-DKH-TZVP | DKH-def2-SVP | DKH2 | CPCM (inf) | ---  | 0.685 | 0.203 | 0.570 | 0.195 | 11.89 | 3.65 | 77 | 73 | 80 |
| PBE_DKH2_SVP_D3BJ_CPCM   | SARC-DKH-TZVP | DKH-def2-SVP | DKH2 | CPCM (inf) | D3BJ | 0.630 | 0.239 | 0.600 | 0.258 | 11.21 | 3.53 | 72 | 74 | 76 |
| TPSSh_DKH2_SVP_CPCM      | SARC-DKH-TZVP | DKH-def2-SVP | DKH2 | CPCM (inf) | ---  | 0.632 | 0.261 | 0.602 | 0.276 | 10.09 | 3.30 | 74 | 75 | 66 |
| B3LYP_DKH2_SVP_CPCM      | SARC-DKH-TZVP | DKH-def2-SVP | DKH2 | CPCM (inf) | ---  | 0.643 | 0.299 | 0.604 | 0.300 | 11.63 | 3.69 | 75 | 76 | 78 |
| PBE0_DKH2_SVP_D3BJ_CPCM  | SARC-DKH-TZVP | DKH-def2-SVP | DKH2 | CPCM (inf) | D3BJ | 0.739 | 0.277 | 0.629 | 0.263 | 10.81 | 3.43 | 80 | 77 | 74 |
| TPSSh_DKH2_SVP_D3BJ_CPCM | SARC-DKH-TZVP | DKH-def2-SVP | DKH2 | CPCM (inf) | D3BJ | 0.691 | 0.287 | 0.630 | 0.278 | 11.83 | 3.55 | 78 | 78 | 79 |
| PBE_DKH2_SVP_CPCM        | SARC-DKH-TZVP | DKH-def2-SVP | DKH2 | CPCM (inf) | ---  | 0.685 | 0.242 | 0.641 | 0.265 | 10.61 | 3.35 | 76 | 79 | 72 |
| PBE0_DKH2_SVP_CPCM       | SARC-DKH-TZVP | DKH-def2-SVP | DKH2 | CPCM (inf) | ---  | 0.735 | 0.341 | 0.698 | 0.334 | 11.25 | 3.40 | 79 | 80 | 77 |

Table S5: RMSD<sub>all</sub>, RMSD<sub>pt</sub> and  $\Delta$  ranking of the 80 different methods for platinum complexes with no overall charge (2, 3, 4, 5, 6, 9)

| Name                      | Pt Basis Set   | Ligand Basis Set | Relativistics | Solvation  | Dispersion | RMSD <sub>all</sub> (Å) | Variance of RMSD <sub>all</sub> (Å) | RMSD <sub>pt</sub> (Å) | Variance of RMSD <sub>pt</sub> (Å) | $\Delta$ (%) | Variance of $\Delta$ (%) | RMSD <sub>all</sub> rank | RMSD <sub>pt</sub> rank | $\Delta$ rank |
|---------------------------|----------------|------------------|---------------|------------|------------|-------------------------|-------------------------------------|------------------------|------------------------------------|--------------|--------------------------|--------------------------|-------------------------|---------------|
| PBE0_ZORA_TZVP_CPCM       | SARC-ZORA-TZVP | ZORA-def2-TZVP   | ZORA          | CPCM (inf) | ---        | 0.081                   | 0.015                               | 0.043                  | 0.011                              | 0.76         | 0.24                     | 1*                       | 1*                      | 2*            |
| PBE0_ZORA_TZVP_D3BJ_CPCM  | SARC-ZORA-TZVP | ZORA-def2-TZVP   | ZORA          | CPCM (inf) | D3BJ       | 0.084                   | 0.018                               | 0.045                  | 0.015                              | 0.73         | 0.22                     | 2*                       | 2*                      | 1*            |
| TPSSh_ZORA_TZVP_D3BJ_CPCM | SARC-ZORA-TZVP | ZORA-def2-TZVP   | ZORA          | CPCM (inf) | D3BJ       | 0.088                   | 0.018                               | 0.047                  | 0.015                              | 0.88         | 0.21                     | 6*                       | 3*                      | 7*            |
| TPSSh_ZORA_TZVP_CPCM      | SARC-ZORA-TZVP | ZORA-def2-TZVP   | ZORA          | CPCM (inf) | ---        | 0.084                   | 0.018                               | 0.047                  | 0.014                              | 1.02         | 0.21                     | 3*                       | 4*                      | 21            |
| PBE0_ZORA_SVP_D3BJ_CPCM   | SARC-ZORA-TZVP | ZORA-def2-SVP    | ZORA          | CPCM (inf) | D3BJ       | 0.086                   | 0.018                               | 0.047                  | 0.014                              | 0.77         | 0.22                     | 4*                       | 5*                      | 3*            |
| PBE_ZORA_TZVP_D3BJ_CPCM   | SARC-ZORA-TZVP | ZORA-def2-TZVP   | ZORA          | CPCM (inf) | D3BJ       | 0.092                   | 0.017                               | 0.049                  | 0.015                              | 1.05         | 0.19                     | 12*                      | 6*                      | 22            |
| PBE_ZORA_SVP_D3BJ_CPCM    | SARC-ZORA-TZVP | ZORA-def2-SVP    | ZORA          | CPCM (inf) | D3BJ       | 0.090                   | 0.017                               | 0.050                  | 0.014                              | 1.13         | 0.20                     | 7*                       | 7*                      | 28            |
| PBE_ZORA_TZVP_CPCM        | SARC-ZORA-TZVP | ZORA-def2-TZVP   | ZORA          | CPCM (inf) | ---        | 0.090                   | 0.016                               | 0.050                  | 0.015                              | 1.20         | 0.20                     | 8*                       | 8*                      | 31            |
| BP86_ZORA_TZVP_D3BJ_CPCM  | SARC-ZORA-TZVP | ZORA-def2-TZVP   | ZORA          | CPCM (inf) | D3BJ       | 0.152                   | 0.060                               | 0.050                  | 0.015                              | 1.12         | 0.19                     | 37                       | 9*                      | 26            |
| BP86_ZORA_TZVP_CPCM       | SARC-ZORA-TZVP | ZORA-def2-TZVP   | ZORA          | CPCM (inf) | ---        | 0.093                   | 0.017                               | 0.052                  | 0.015                              | 1.41         | 0.21                     | 14*                      | 10*                     | 34            |
| TPSSh_ZORA_SVP_CPCM       | SARC-ZORA-TZVP | ZORA-def2-SVP    | ZORA          | CPCM (inf) | ---        | 0.088                   | 0.017                               | 0.052                  | 0.014                              | 1.13         | 0.21                     | 5*                       | 11*                     | 29            |
| TPSSh_ZORA_SVP_D3BJ_CPCM  | SARC-ZORA-TZVP | ZORA-def2-SVP    | ZORA          | CPCM (inf) | D3BJ       | 0.090                   | 0.019                               | 0.052                  | 0.017                              | 0.99         | 0.22                     | 9*                       | 12*                     | 16*           |
| PBE0_ZORA_TZVP_D3BJ       | SARC-ZORA-TZVP | ZORA-def2-TZVP   | ZORA          | ---        | D3BJ       | 0.133                   | 0.043                               | 0.052                  | 0.010                              | 1.06         | 0.20                     | 20                       | 13*                     | 24            |
| PBE_ZORA_SVP_CPCM         | SARC-ZORA-TZVP | ZORA-def2-SVP    | ZORA          | CPCM (inf) | ---        | 0.092                   | 0.017                               | 0.053                  | 0.015                              | 1.25         | 0.20                     | 11*                      | 14*                     | 32            |
| BP86_ZORA_SVP_D3BJ_CPCM   | SARC-ZORA-TZVP | ZORA-def2-SVP    | ZORA          | CPCM (inf) | D3BJ       | 0.094                   | 0.018                               | 0.053                  | 0.014                              | 1.14         | 0.20                     | 15*                      | 15*                     | 30            |
| PBE0_ZORA_TZVP            | SARC-ZORA-TZVP | ZORA-def2-TZVP   | ZORA          | ---        | ---        | 0.136                   | 0.042                               | 0.055                  | 0.011                              | 1.01         | 0.22                     | 21                       | 16                      | 19            |
| B3LYP_ZORA_TZVP_D3BJ_CPCM | SARC-ZORA-TZVP | ZORA-def2-TZVP   | ZORA          | CPCM (inf) | D3BJ       | 0.094                   | 0.017                               | 0.056                  | 0.013                              | 1.57         | 0.21                     | 16*                      | 17                      | 38            |
| BP86_ZORA_SVP_CPCM        | SARC-ZORA-TZVP | ZORA-def2-SVP    | ZORA          | CPCM (inf) | ---        | 0.095                   | 0.017                               | 0.057                  | 0.015                              | 1.43         | 0.21                     | 17*                      | 18                      | 35            |
| B3LYP_ZORA_SVP_D3BJ_CPCM  | SARC-ZORA-TZVP | ZORA-def2-SVP    | ZORA          | CPCM (inf) | D3BJ       | 0.091                   | 0.017                               | 0.057                  | 0.013                              | 1.54         | 0.21                     | 10*                      | 19                      | 37            |
| PBE_ZORA_TZVP_D3BJ        | SARC-ZORA-TZVP | ZORA-def2-TZVP   | ZORA          | ---        | D3BJ       | 0.139                   | 0.042                               | 0.058                  | 0.014                              | 0.89         | 0.25                     | 22                       | 20                      | 9*            |
| PBE_ZORA_TZVP             | SARC-ZORA-TZVP | ZORA-def2-TZVP   | ZORA          | ---        | ---        | 0.139                   | 0.045                               | 0.059                  | 0.013                              | 0.91         | 0.27                     | 23                       | 21                      | 12*           |
| TPSSh_ZORA_TZVP           | SARC-ZORA-TZVP | ZORA-def2-TZVP   | ZORA          | ---        | ---        | 0.143                   | 0.045                               | 0.059                  | 0.014                              | 0.88         | 0.25                     | 26                       | 22                      | 8*            |
| PBE0_ZORA_SVP_CPCM        | SARC-ZORA-TZVP | ZORA-def2-SVP    | ZORA          | CPCM (inf) | ---        | 0.159                   | 0.080                               | 0.060                  | 0.014                              | 0.86         | 0.21                     | 40                       | 23                      | 5*            |
| B3LYP_ZORA_TZVP_D3BJ      | SARC-ZORA-TZVP | ZORA-def2-TZVP   | ZORA          | ---        | D3BJ       | 0.142                   | 0.045                               | 0.060                  | 0.013                              | 1.10         | 0.33                     | 24                       | 24                      | 25            |
| PBE0_ZORA_SVP_D3BJ        | SARC-ZORA-TZVP | ZORA-def2-SVP    | ZORA          | ---        | D3BJ       | 0.146                   | 0.044                               | 0.060                  | 0.013                              | 1.00         | 0.19                     | 30                       | 25                      | 18*           |
| PBE0_ZORA_SVP             | SARC-ZORA-TZVP | ZORA-def2-SVP    | ZORA          | ---        | ---        | 0.145                   | 0.046                               | 0.060                  | 0.011                              | 0.99         | 0.20                     | 29                       | 26                      | 17*           |
| B3LYP_ZORA_TZVP_CPCM      | SARC-ZORA-TZVP | ZORA-def2-TZVP   | ZORA          | CPCM (inf) | ---        | 0.097                   | 0.017                               | 0.060                  | 0.012                              | 1.91         | 0.22                     | 18                       | 27                      | 40            |
| TPSSh_ZORA_TZVP_D3BJ      | SARC-ZORA-TZVP | ZORA-def2-TZVP   | ZORA          | ---        | D3BJ       | 0.146                   | 0.045                               | 0.061                  | 0.014                              | 0.91         | 0.23                     | 31                       | 28                      | 13*           |
| BP86_ZORA_TZVP_D3BJ       | SARC-ZORA-TZVP | ZORA-def2-TZVP   | ZORA          | ---        | D3BJ       | 0.144                   | 0.047                               | 0.061                  | 0.016                              | 0.94         | 0.27                     | 27                       | 29                      | 14*           |
| BP86_ZORA_SVP_D3BJ        | SARC-ZORA-TZVP | ZORA-def2-SVP    | ZORA          | ---        | D3BJ       | 0.152                   | 0.045                               | 0.062                  | 0.016                              | 0.89         | 0.24                     | 35                       | 30                      | 10*           |
| B3LYP_ZORA_SVP_CPCM       | SARC-ZORA-TZVP | ZORA-def2-SVP    | ZORA          | CPCM (inf) | ---        | 0.093                   | 0.016                               | 0.062                  | 0.013                              | 1.87         | 0.24                     | 13*                      | 31                      | 39            |
| BP86_ZORA_TZVP            | SARC-ZORA-TZVP | ZORA-def2-TZVP   | ZORA          | ---        | ---        | 0.145                   | 0.043                               | 0.062                  | 0.015                              | 1.02         | 0.29                     | 28                       | 32                      | 20            |
| TPSSh_ZORA_SVP_D3BJ       | SARC-ZORA-TZVP | ZORA-def2-SVP    | ZORA          | ---        | D3BJ       | 0.152                   | 0.047                               | 0.064                  | 0.015                              | 0.85         | 0.23                     | 34                       | 33                      | 4*            |

|                           |                |                |      |            |      |       |       |       |       |       |      |    |    |     |
|---------------------------|----------------|----------------|------|------------|------|-------|-------|-------|-------|-------|------|----|----|-----|
| B3LYP_ZORA_SVP_D3BJ       | SARC-ZORA-TZVP | ZORA-def2-SVP  | ZORA | ---        | D3BJ | 0.150 | 0.044 | 0.064 | 0.014 | 1.12  | 0.29 | 32 | 34 | 27  |
| TPSSh_ZORA_SVP            | SARC-ZORA-TZVP | ZORA-def2-SVP  | ZORA | ---        | ---  | 0.152 | 0.046 | 0.064 | 0.014 | 0.90  | 0.23 | 36 | 35 | 11* |
| PBE_ZORA_SVP_D3BJ         | SARC-ZORA-TZVP | ZORA-def2-SVP  | ZORA | ---        | D3BJ | 0.129 | 0.027 | 0.064 | 0.016 | 0.88  | 0.23 | 19 | 36 | 6*  |
| PBE_ZORA_SVP              | SARC-ZORA-TZVP | ZORA-def2-SVP  | ZORA | ---        | ---  | 0.150 | 0.045 | 0.065 | 0.015 | 0.98  | 0.23 | 33 | 37 | 15* |
| B3LYP_ZORA_TZVP           | SARC-ZORA-TZVP | ZORA-def2-TZVP | ZORA | ---        | ---  | 0.142 | 0.042 | 0.065 | 0.013 | 1.39  | 0.34 | 25 | 38 | 33  |
| BP86_ZORA_SVP             | SARC-ZORA-TZVP | ZORA-def2-SVP  | ZORA | ---        | ---  | 0.154 | 0.046 | 0.067 | 0.016 | 1.06  | 0.25 | 39 | 39 | 23  |
| B3LYP_ZORA_SVP            | SARC-ZORA-TZVP | ZORA-def2-SVP  | ZORA | ---        | ---  | 0.153 | 0.045 | 0.068 | 0.013 | 1.44  | 0.31 | 38 | 40 | 36  |
| BP86_DKH2_TZVP_D3BJ_CPCM  | SARC-DKH-TZVP  | DKH-def2-TZVP  | DKH2 | CPCM (inf) | D3BJ | 0.249 | 0.055 | 0.139 | 0.017 | 4.80  | 0.40 | 42 | 41 | 51  |
| PBE_DKH2_TZVP_D3BJ_CPCM   | SARC-DKH-TZVP  | DKH-def2-TZVP  | DKH2 | CPCM (inf) | D3BJ | 0.248 | 0.056 | 0.139 | 0.018 | 4.73  | 0.43 | 41 | 42 | 49  |
| TPSSh_DKH2_TZVP_CPCM      | SARC-DKH-TZVP  | DKH-def2-TZVP  | DKH2 | CPCM (inf) | ---  | 0.255 | 0.055 | 0.140 | 0.016 | 4.91  | 0.46 | 43 | 43 | 54  |
| PBE0_DKH2_TZVP_CPCM       | SARC-DKH-TZVP  | DKH-def2-TZVP  | DKH2 | CPCM (inf) | ---  | 0.256 | 0.054 | 0.142 | 0.015 | 4.67  | 0.51 | 44 | 44 | 46  |
| PBE0_DKH2_TZVP_D3BJ_CPCM  | SARC-DKH-TZVP  | DKH-def2-TZVP  | DKH2 | CPCM (inf) | D3BJ | 0.297 | 0.083 | 0.142 | 0.017 | 4.51  | 0.53 | 49 | 45 | 42  |
| TPSSh_DKH2_TZVP_D3BJ_CPCM | SARC-DKH-TZVP  | DKH-def2-TZVP  | DKH2 | CPCM (inf) | D3BJ | 0.292 | 0.075 | 0.144 | 0.018 | 4.68  | 0.48 | 48 | 46 | 47  |
| BP86_DKH2_TZVP_D3BJ       | SARC-DKH-TZVP  | DKH-def2-TZVP  | DKH2 | ---        | D3BJ | 0.260 | 0.056 | 0.145 | 0.020 | 4.70  | 0.42 | 46 | 47 | 48  |
| PBE0_DKH2_TZVP_D3BJ       | SARC-DKH-TZVP  | DKH-def2-TZVP  | DKH2 | ---        | D3BJ | 0.310 | 0.085 | 0.149 | 0.020 | 4.47  | 0.54 | 50 | 48 | 41  |
| TPSSh_DKH2_TZVP_D3BJ      | SARC-DKH-TZVP  | DKH-def2-TZVP  | DKH2 | ---        | D3BJ | 0.314 | 0.088 | 0.149 | 0.020 | 4.65  | 0.47 | 54 | 49 | 44  |
| PBE_DKH2_TZVP_CPCM        | SARC-DKH-TZVP  | DKH-def2-TZVP  | DKH2 | CPCM (inf) | ---  | 0.259 | 0.052 | 0.150 | 0.017 | 4.88  | 0.41 | 45 | 50 | 53  |
| BP86_DKH2_TZVP_CPCM       | SARC-DKH-TZVP  | DKH-def2-TZVP  | DKH2 | CPCM (inf) | ---  | 0.263 | 0.054 | 0.150 | 0.017 | 5.04  | 0.42 | 47 | 51 | 56  |
| B3LYP_DKH2_TZVP_D3BJ_CPCM | SARC-DKH-TZVP  | DKH-def2-TZVP  | DKH2 | CPCM (inf) | D3BJ | 0.310 | 0.083 | 0.150 | 0.017 | 5.21  | 0.49 | 51 | 52 | 57  |
| PBE_DKH2_TZVP_D3BJ        | SARC-DKH-TZVP  | DKH-def2-TZVP  | DKH2 | ---        | D3BJ | 0.314 | 0.088 | 0.153 | 0.021 | 4.65  | 0.41 | 53 | 53 | 45  |
| PBE0_DKH2_TZVP            | SARC-DKH-TZVP  | DKH-def2-TZVP  | DKH2 | ---        | ---  | 0.322 | 0.090 | 0.153 | 0.019 | 4.62  | 0.49 | 58 | 54 | 43  |
| TPSSh_DKH2_TZVP           | SARC-DKH-TZVP  | DKH-def2-TZVP  | DKH2 | ---        | ---  | 0.315 | 0.085 | 0.155 | 0.021 | 4.83  | 0.48 | 55 | 55 | 52  |
| B3LYP_DKH2_TZVP_D3BJ      | SARC-DKH-TZVP  | DKH-def2-TZVP  | DKH2 | ---        | D3BJ | 0.314 | 0.083 | 0.156 | 0.019 | 5.24  | 0.42 | 52 | 56 | 58  |
| BP86_DKH2_TZVP            | SARC-DKH-TZVP  | DKH-def2-TZVP  | DKH2 | ---        | ---  | 0.317 | 0.085 | 0.156 | 0.020 | 4.93  | 0.40 | 56 | 57 | 55  |
| PBE_DKH2_TZVP             | SARC-DKH-TZVP  | DKH-def2-TZVP  | DKH2 | ---        | ---  | 0.318 | 0.087 | 0.156 | 0.021 | 4.77  | 0.42 | 57 | 58 | 50  |
| B3LYP_DKH2_TZVP_CPCM      | SARC-DKH-TZVP  | DKH-def2-TZVP  | DKH2 | CPCM (inf) | ---  | 0.324 | 0.089 | 0.156 | 0.016 | 5.48  | 0.49 | 59 | 59 | 60  |
| B3LYP_DKH2_TZVP           | SARC-DKH-TZVP  | DKH-def2-TZVP  | DKH2 | ---        | ---  | 0.329 | 0.087 | 0.164 | 0.019 | 5.46  | 0.51 | 60 | 60 | 59  |
| TPSSh_DKH2_SVP            | SARC-DKH-TZVP  | DKH-def2-SVP   | DKH2 | ---        | ---  | 0.511 | 0.143 | 0.258 | 0.024 | 10.56 | 1.59 | 74 | 61 | 73  |
| TPSSh_DKH2_SVP_D3BJ       | SARC-DKH-TZVP  | DKH-def2-SVP   | DKH2 | ---        | D3BJ | 0.471 | 0.131 | 0.258 | 0.022 | 10.55 | 1.57 | 72 | 62 | 72  |
| BP86_DKH2_SVP_D3BJ        | SARC-DKH-TZVP  | DKH-def2-SVP   | DKH2 | ---        | D3BJ | 0.375 | 0.065 | 0.260 | 0.027 | 9.29  | 1.15 | 61 | 63 | 65  |
| TPSSh_DKH2_SVP_CPCM       | SARC-DKH-TZVP  | DKH-def2-SVP   | DKH2 | CPCM (inf) | ---  | 0.520 | 0.140 | 0.261 | 0.024 | 10.63 | 1.52 | 76 | 64 | 75  |
| PBE_DKH2_SVP_D3BJ         | SARC-DKH-TZVP  | DKH-def2-SVP   | DKH2 | ---        | D3BJ | 0.377 | 0.065 | 0.262 | 0.027 | 9.24  | 1.19 | 62 | 65 | 64  |
| B3LYP_DKH2_SVP_CPCM       | SARC-DKH-TZVP  | DKH-def2-SVP   | DKH2 | CPCM (inf) | ---  | 0.542 | 0.146 | 0.262 | 0.024 | 10.71 | 1.51 | 79 | 66 | 78  |
| TPSSh_DKH2_SVP_D3BJ_CPCM  | SARC-DKH-TZVP  | DKH-def2-SVP   | DKH2 | CPCM (inf) | D3BJ | 0.423 | 0.088 | 0.262 | 0.028 | 9.38  | 1.15 | 67 | 67 | 66  |
| BP86_DKH2_SVP_D3BJ_CPCM   | SARC-DKH-TZVP  | DKH-def2-SVP   | DKH2 | CPCM (inf) | D3BJ | 0.402 | 0.075 | 0.262 | 0.025 | 9.15  | 1.11 | 63 | 68 | 62  |
| B3LYP_DKH2_SVP            | SARC-DKH-TZVP  | DKH-def2-SVP   | DKH2 | ---        | ---  | 0.529 | 0.149 | 0.263 | 0.031 | 11.62 | 2.16 | 77 | 69 | 80  |
| PBE0_DKH2_SVP_D3BJ        | SARC-DKH-TZVP  | DKH-def2-SVP   | DKH2 | ---        | D3BJ | 0.552 | 0.152 | 0.264 | 0.023 | 10.57 | 1.53 | 80 | 70 | 74  |

|                          |               |              |      |            |      |       |       |       |       |       |      |    |    |    |
|--------------------------|---------------|--------------|------|------------|------|-------|-------|-------|-------|-------|------|----|----|----|
| BP86_DKH2_SVP            | SARC-DKH-TZVP | DKH-def2-SVP | DKH2 | ---        | ---  | 0.481 | 0.150 | 0.265 | 0.032 | 10.70 | 1.60 | 73 | 71 | 76 |
| PBE0_DKH2_SVP_D3BJ_CPCM  | SARC-DKH-TZVP | DKH-def2-SVP | DKH2 | CPCM (inf) | D3BJ | 0.414 | 0.081 | 0.269 | 0.027 | 9.60  | 1.14 | 66 | 72 | 69 |
| PBE0_DKH2_SVP_CPCM       | SARC-DKH-TZVP | DKH-def2-SVP | DKH2 | CPCM (inf) | ---  | 0.446 | 0.088 | 0.274 | 0.028 | 9.63  | 1.17 | 70 | 73 | 70 |
| PBE_DKH2_SVP_D3BJ_CPCM   | SARC-DKH-TZVP | DKH-def2-SVP | DKH2 | CPCM (inf) | D3BJ | 0.403 | 0.079 | 0.274 | 0.031 | 9.10  | 1.14 | 64 | 74 | 61 |
| PBE0_DKH2_SVP            | SARC-DKH-TZVP | DKH-def2-SVP | DKH2 | ---        | ---  | 0.533 | 0.154 | 0.275 | 0.030 | 10.71 | 1.58 | 78 | 75 | 77 |
| BP86_DKH2_SVP_CPCM       | SARC-DKH-TZVP | DKH-def2-SVP | DKH2 | CPCM (inf) | ---  | 0.410 | 0.081 | 0.280 | 0.039 | 9.53  | 1.14 | 65 | 76 | 68 |
| B3LYP_DKH2_SVP_D3BJ      | SARC-DKH-TZVP | DKH-def2-SVP | DKH2 | ---        | D3BJ | 0.518 | 0.148 | 0.281 | 0.025 | 10.86 | 1.74 | 75 | 77 | 79 |
| PBE_DKH2_SVP_CPCM        | SARC-DKH-TZVP | DKH-def2-SVP | DKH2 | CPCM (inf) | ---  | 0.446 | 0.097 | 0.284 | 0.039 | 9.42  | 1.14 | 71 | 78 | 67 |
| B3LYP_DKH2_SVP_D3BJ_CPCM | SARC-DKH-TZVP | DKH-def2-SVP | DKH2 | CPCM (inf) | D3BJ | 0.444 | 0.089 | 0.294 | 0.041 | 9.63  | 1.20 | 69 | 79 | 71 |
| PBE_DKH2_SVP             | SARC-DKH-TZVP | DKH-def2-SVP | DKH2 | ---        | ---  | 0.426 | 0.081 | 0.314 | 0.045 | 9.20  | 1.15 | 68 | 80 | 63 |

Table S6: RMSD<sub>all</sub>, RMSD<sub>pt</sub> and  $\Delta$  ranking of the 80 different methods for platinum complexes with an overall charge (2, 3, 4, 5, 6, 9)

| Name                      | Pt Basis Set   | Ligand Basis Set | Relativistics | Solvation  | Dispersion | RMSD <sub>all</sub> (Å) | Variance of RMSD <sub>all</sub> (Å) | RMSD <sub>pt</sub> (Å) | Variance of RMSD <sub>pt</sub> (Å) | $\Delta$ (%) | Variance of $\Delta$ (%) | RMSD <sub>all</sub> rank | RMSD <sub>pt</sub> rank | $\Delta$ rank |
|---------------------------|----------------|------------------|---------------|------------|------------|-------------------------|-------------------------------------|------------------------|------------------------------------|--------------|--------------------------|--------------------------|-------------------------|---------------|
| PBE0_ZORA_TZVP_D3BJ_CPCM  | SARC-ZORA-TZVP | ZORA-def2-TZVP   | ZORA          | CPCM (inf) | D3BJ       | 0.044                   | 0.019                               | 0.020                  | 0.006                              | 0.44         | 0.08                     | 1*                       | 1*                      | 1*            |
| PBE0_ZORA_TZVP_CPCM       | SARC-ZORA-TZVP | ZORA-def2-TZVP   | ZORA          | CPCM (inf) | ---        | 0.045                   | 0.019                               | 0.021                  | 0.006                              | 0.50         | 0.07                     | 2*                       | 2*                      | 2*            |
| PBE0_ZORA_SVP_D3BJ_CPCM   | SARC-ZORA-TZVP | ZORA-def2-SVP    | ZORA          | CPCM (inf) | D3BJ       | 0.046                   | 0.018                               | 0.023                  | 0.006                              | 0.56         | 0.07                     | 3*                       | 3*                      | 3             |
| PBE0_ZORA_SVP_CPCM        | SARC-ZORA-TZVP | ZORA-def2-SVP    | ZORA          | CPCM (inf) | ---        | 0.048                   | 0.017                               | 0.024                  | 0.005                              | 0.61         | 0.08                     | 4*                       | 4*                      | 4             |
| TPSSH_ZORA_TZVP_D3BJ_CPCM | SARC-ZORA-TZVP | ZORA-def2-TZVP   | ZORA          | CPCM (inf) | D3BJ       | 0.051                   | 0.016                               | 0.027                  | 0.005                              | 0.80         | 0.15                     | 5*                       | 5                       | 5             |
| TPSSH_ZORA_TZVP_CPCM      | SARC-ZORA-TZVP | ZORA-def2-TZVP   | ZORA          | CPCM (inf) | ---        | 0.053                   | 0.016                               | 0.029                  | 0.004                              | 0.89         | 0.17                     | 6*                       | 6                       | 7             |
| TPSSH_ZORA_SVP_D3BJ_CPCM  | SARC-ZORA-TZVP | ZORA-def2-SVP    | ZORA          | CPCM (inf) | D3BJ       | 0.055                   | 0.016                               | 0.031                  | 0.004                              | 0.93         | 0.16                     | 9*                       | 7                       | 9             |
| PBE0_ZORA_TZVP_D3BJ       | SARC-ZORA-TZVP | ZORA-def2-TZVP   | ZORA          | ---        | D3BJ       | 0.055                   | 0.017                               | 0.031                  | 0.005                              | 0.87         | 0.12                     | 7*                       | 8                       | 6             |
| PBE0_ZORA_TZVP            | SARC-ZORA-TZVP | ZORA-def2-TZVP   | ZORA          | ---        | ---        | 0.055                   | 0.016                               | 0.032                  | 0.005                              | 0.92         | 0.14                     | 8*                       | 9                       | 8             |
| TPSSH_ZORA_SVP_CPCM       | SARC-ZORA-TZVP | ZORA-def2-SVP    | ZORA          | CPCM (inf) | ---        | 0.057                   | 0.015                               | 0.032                  | 0.004                              | 1.03         | 0.20                     | 10*                      | 10                      | 12            |
| PBE_ZORA_TZVP_D3BJ_CPCM   | SARC-ZORA-TZVP | ZORA-def2-TZVP   | ZORA          | CPCM (inf) | D3BJ       | 0.057                   | 0.015                               | 0.033                  | 0.006                              | 1.09         | 0.26                     | 11*                      | 11                      | 13            |
| PBE0_ZORA_SVP_D3BJ        | SARC-ZORA-TZVP | ZORA-def2-SVP    | ZORA          | ---        | D3BJ       | 0.057                   | 0.017                               | 0.034                  | 0.006                              | 0.95         | 0.15                     | 12*                      | 12                      | 10            |
| BP86_ZORA_TZVP_D3BJ_CPCM  | SARC-ZORA-TZVP | ZORA-def2-TZVP   | ZORA          | CPCM (inf) | D3BJ       | 0.058                   | 0.015                               | 0.035                  | 0.006                              | 1.16         | 0.27                     | 14*                      | 13                      | 14            |
| PBE0_ZORA_SVP             | SARC-ZORA-TZVP | ZORA-def2-SVP    | ZORA          | ---        | ---        | 0.058                   | 0.016                               | 0.035                  | 0.005                              | 0.99         | 0.18                     | 13*                      | 14                      | 11            |
| PBE_ZORA_TZVP_CPCM        | SARC-ZORA-TZVP | ZORA-def2-TZVP   | ZORA          | CPCM (inf) | ---        | 0.064                   | 0.018                               | 0.035                  | 0.006                              | 1.21         | 0.28                     | 19                       | 15                      | 16            |
| PBE_ZORA_SVP_D3BJ_CPCM    | SARC-ZORA-TZVP | ZORA-def2-SVP    | ZORA          | CPCM (inf) | D3BJ       | 0.062                   | 0.014                               | 0.038                  | 0.005                              | 1.19         | 0.28                     | 15*                      | 16                      | 15            |
| PBE_ZORA_SVP_CPCM         | SARC-ZORA-TZVP | ZORA-def2-SVP    | ZORA          | CPCM (inf) | ---        | 0.063                   | 0.014                               | 0.038                  | 0.006                              | 1.31         | 0.29                     | 17*                      | 17                      | 19            |
| BP86_ZORA_TZVP_CPCM       | SARC-ZORA-TZVP | ZORA-def2-TZVP   | ZORA          | CPCM (inf) | ---        | 0.066                   | 0.017                               | 0.038                  | 0.006                              | 1.39         | 0.30                     | 23                       | 18                      | 21            |
| B3LYP_ZORA_TZVP_D3BJ_CPCM | SARC-ZORA-TZVP | ZORA-def2-TZVP   | ZORA          | CPCM (inf) | D3BJ       | 0.062                   | 0.014                               | 0.039                  | 0.004                              | 1.40         | 0.27                     | 16*                      | 19                      | 23            |
| TPSSH_ZORA_TZVP_D3BJ      | SARC-ZORA-TZVP | ZORA-def2-TZVP   | ZORA          | ---        | D3BJ       | 0.063                   | 0.015                               | 0.040                  | 0.004                              | 1.25         | 0.22                     | 18*                      | 20                      | 17            |
| BP86_ZORA_SVP_D3BJ_CPCM   | SARC-ZORA-TZVP | ZORA-def2-SVP    | ZORA          | CPCM (inf) | D3BJ       | 0.064                   | 0.013                               | 0.040                  | 0.006                              | 1.29         | 0.29                     | 20                       | 21                      | 18            |
| TPSSH_ZORA_TZVP           | SARC-ZORA-TZVP | ZORA-def2-TZVP   | ZORA          | ---        | ---        | 0.065                   | 0.015                               | 0.041                  | 0.004                              | 1.39         | 0.23                     | 21                       | 22                      | 22            |
| TPSSH_ZORA_SVP_D3BJ       | SARC-ZORA-TZVP | ZORA-def2-SVP    | ZORA          | ---        | D3BJ       | 0.067                   | 0.016                               | 0.042                  | 0.005                              | 1.34         | 0.25                     | 24                       | 23                      | 20            |
| B3LYP_ZORA_SVP_D3BJ_CPCM  | SARC-ZORA-TZVP | ZORA-def2-SVP    | ZORA          | CPCM (inf) | D3BJ       | 0.065                   | 0.012                               | 0.042                  | 0.004                              | 1.46         | 0.30                     | 22                       | 24                      | 24            |
| TPSSH_ZORA_SVP            | SARC-ZORA-TZVP | ZORA-def2-SVP    | ZORA          | ---        | ---        | 0.069                   | 0.015                               | 0.044                  | 0.004                              | 1.48         | 0.24                     | 26                       | 25                      | 25            |
| B3LYP_ZORA_TZVP_CPCM      | SARC-ZORA-TZVP | ZORA-def2-TZVP   | ZORA          | CPCM (inf) | ---        | 0.070                   | 0.016                               | 0.044                  | 0.005                              | 1.67         | 0.28                     | 28                       | 26                      | 30            |
| BP86_ZORA_SVP_CPCM        | SARC-ZORA-TZVP | ZORA-def2-SVP    | ZORA          | CPCM (inf) | ---        | 0.069                   | 0.014                               | 0.044                  | 0.006                              | 1.50         | 0.33                     | 27                       | 27                      | 26            |
| PBE_ZORA_TZVP_D3BJ        | SARC-ZORA-TZVP | ZORA-def2-TZVP   | ZORA          | ---        | D3BJ       | 0.068                   | 0.014                               | 0.045                  | 0.006                              | 1.58         | 0.29                     | 25                       | 28                      | 27            |
| BP86_ZORA_TZVP_D3BJ       | SARC-ZORA-TZVP | ZORA-def2-TZVP   | ZORA          | ---        | D3BJ       | 0.071                   | 0.014                               | 0.047                  | 0.006                              | 1.63         | 0.31                     | 29                       | 29                      | 29            |
| PBE_ZORA_TZVP             | SARC-ZORA-TZVP | ZORA-def2-TZVP   | ZORA          | ---        | ---        | 0.072                   | 0.014                               | 0.047                  | 0.006                              | 1.70         | 0.30                     | 30                       | 30                      | 32            |
| PBE_ZORA_SVP_D3BJ         | SARC-ZORA-TZVP | ZORA-def2-SVP    | ZORA          | ---        | D3BJ       | 0.072                   | 0.014                               | 0.048                  | 0.006                              | 1.60         | 0.32                     | 31                       | 31                      | 28            |
| B3LYP_ZORA_SVP_CPCM       | SARC-ZORA-TZVP | ZORA-def2-SVP    | ZORA          | CPCM (inf) | ---        | 0.073                   | 0.013                               | 0.048                  | 0.005                              | 1.72         | 0.32                     | 32                       | 32                      | 33            |
| PBE_ZORA_SVP              | SARC-ZORA-TZVP | ZORA-def2-SVP    | ZORA          | ---        | ---        | 0.074                   | 0.014                               | 0.049                  | 0.006                              | 1.75         | 0.33                     | 34                       | 33                      | 34            |

|                           |                |                |      |            |      |       |       |       |       |       |      |    |    |    |
|---------------------------|----------------|----------------|------|------------|------|-------|-------|-------|-------|-------|------|----|----|----|
| BP86_ZORA_SVP_D3BJ        | SARC-ZORA-TZVP | ZORA-def2-SVP  | ZORA | ---        | D3BJ | 0.074 | 0.014 | 0.049 | 0.006 | 1.68  | 0.34 | 36 | 34 | 31 |
| BP86_ZORA_TZVP            | SARC-ZORA-TZVP | ZORA-def2-TZVP | ZORA | ---        | ---  | 0.074 | 0.014 | 0.051 | 0.006 | 1.88  | 0.32 | 35 | 35 | 35 |
| B3LYP_ZORA_TZVP_D3BJ      | SARC-ZORA-TZVP | ZORA-def2-TZVP | ZORA | ---        | D3BJ | 0.074 | 0.012 | 0.052 | 0.005 | 1.89  | 0.35 | 33 | 36 | 37 |
| B3LYP_ZORA_SVP_D3BJ       | SARC-ZORA-TZVP | ZORA-def2-SVP  | ZORA | ---        | D3BJ | 0.076 | 0.013 | 0.053 | 0.005 | 1.89  | 0.36 | 37 | 37 | 36 |
| BP86_ZORA_SVP             | SARC-ZORA-TZVP | ZORA-def2-SVP  | ZORA | ---        | ---  | 0.077 | 0.013 | 0.053 | 0.006 | 1.94  | 0.35 | 38 | 38 | 38 |
| B3LYP_ZORA_TZVP           | SARC-ZORA-TZVP | ZORA-def2-TZVP | ZORA | ---        | ---  | 0.078 | 0.012 | 0.056 | 0.005 | 2.18  | 0.35 | 39 | 39 | 39 |
| B3LYP_ZORA_SVP            | SARC-ZORA-TZVP | ZORA-def2-SVP  | ZORA | ---        | ---  | 0.080 | 0.011 | 0.057 | 0.006 | 2.21  | 0.38 | 40 | 40 | 40 |
| B3LYP_DKH2_TZVP_D3BJ      | SARC-DKH-TZVP  | DKH-def2-TZVP  | DKH2 | ---        | D3BJ | 0.115 | 0.016 | 0.100 | 0.012 | 4.27  | 0.43 | 42 | 41 | 46 |
| B3LYP_DKH2_TZVP           | SARC-DKH-TZVP  | DKH-def2-TZVP  | DKH2 | ---        | ---  | 0.118 | 0.019 | 0.101 | 0.012 | 4.31  | 0.42 | 43 | 42 | 50 |
| PBE0_DKH2_TZVP            | SARC-DKH-TZVP  | DKH-def2-TZVP  | DKH2 | ---        | ---  | 0.120 | 0.016 | 0.104 | 0.012 | 4.37  | 0.47 | 46 | 43 | 55 |
| PBE0_DKH2_TZVP_D3BJ       | SARC-DKH-TZVP  | DKH-def2-TZVP  | DKH2 | ---        | D3BJ | 0.120 | 0.016 | 0.104 | 0.013 | 4.35  | 0.50 | 45 | 44 | 53 |
| B3LYP_DKH2_TZVP_D3BJ_CPCM | SARC-DKH-TZVP  | DKH-def2-TZVP  | DKH2 | CPCM (inf) | D3BJ | 0.153 | 0.050 | 0.104 | 0.017 | 4.19  | 0.44 | 47 | 45 | 41 |
| TPSSH_DKH2_TZVP           | SARC-DKH-TZVP  | DKH-def2-TZVP  | DKH2 | ---        | ---  | 0.119 | 0.015 | 0.104 | 0.011 | 4.40  | 0.40 | 44 | 46 | 59 |
| BP86_DKH2_TZVP            | SARC-DKH-TZVP  | DKH-def2-TZVP  | DKH2 | ---        | ---  | 0.114 | 0.014 | 0.105 | 0.016 | 4.36  | 0.39 | 41 | 47 | 54 |
| B3LYP_DKH2_TZVP_CPCM      | SARC-DKH-TZVP  | DKH-def2-TZVP  | DKH2 | CPCM (inf) | ---  | 0.154 | 0.051 | 0.106 | 0.016 | 4.23  | 0.42 | 49 | 48 | 43 |
| TPSSH_DKH2_TZVP_D3BJ_CPCM | SARC-DKH-TZVP  | DKH-def2-TZVP  | DKH2 | CPCM (inf) | D3BJ | 0.161 | 0.053 | 0.109 | 0.017 | 4.33  | 0.45 | 58 | 49 | 52 |
| PBE0_DKH2_TZVP_CPCM       | SARC-DKH-TZVP  | DKH-def2-TZVP  | DKH2 | CPCM (inf) | ---  | 0.161 | 0.052 | 0.109 | 0.017 | 4.31  | 0.56 | 57 | 50 | 49 |
| PBE0_DKH2_TZVP_D3BJ_CPCM  | SARC-DKH-TZVP  | DKH-def2-TZVP  | DKH2 | CPCM (inf) | D3BJ | 0.158 | 0.050 | 0.109 | 0.018 | 4.28  | 0.59 | 54 | 51 | 47 |
| BP86_DKH2_TZVP_D3BJ_CPCM  | SARC-DKH-TZVP  | DKH-def2-TZVP  | DKH2 | CPCM (inf) | D3BJ | 0.160 | 0.051 | 0.109 | 0.020 | 4.21  | 0.42 | 55 | 52 | 42 |
| TPSSH_DKH2_TZVP_D3BJ      | SARC-DKH-TZVP  | DKH-def2-TZVP  | DKH2 | ---        | D3BJ | 0.158 | 0.052 | 0.110 | 0.017 | 4.47  | 0.41 | 53 | 53 | 60 |
| PBE_DKH2_TZVP_D3BJ_CPCM   | SARC-DKH-TZVP  | DKH-def2-TZVP  | DKH2 | CPCM (inf) | D3BJ | 0.164 | 0.054 | 0.110 | 0.019 | 4.30  | 0.44 | 59 | 54 | 48 |
| TPSSH_DKH2_TZVP_CPCM      | SARC-DKH-TZVP  | DKH-def2-TZVP  | DKH2 | CPCM (inf) | ---  | 0.161 | 0.052 | 0.110 | 0.017 | 4.37  | 0.43 | 56 | 55 | 56 |
| BP86_DKH2_TZVP_D3BJ       | SARC-DKH-TZVP  | DKH-def2-TZVP  | DKH2 | ---        | D3BJ | 0.157 | 0.053 | 0.111 | 0.020 | 4.33  | 0.39 | 52 | 56 | 51 |
| PBE_DKH2_TZVP             | SARC-DKH-TZVP  | DKH-def2-TZVP  | DKH2 | ---        | ---  | 0.155 | 0.050 | 0.111 | 0.020 | 4.39  | 0.39 | 51 | 57 | 58 |
| BP86_DKH2_TZVP_CPCM       | SARC-DKH-TZVP  | DKH-def2-TZVP  | DKH2 | CPCM (inf) | ---  | 0.154 | 0.048 | 0.111 | 0.021 | 4.25  | 0.41 | 48 | 58 | 44 |
| PBE_DKH2_TZVP_CPCM        | SARC-DKH-TZVP  | DKH-def2-TZVP  | DKH2 | CPCM (inf) | ---  | 0.165 | 0.053 | 0.112 | 0.019 | 4.27  | 0.42 | 60 | 59 | 45 |
| PBE_DKH2_TZVP_D3BJ        | SARC-DKH-TZVP  | DKH-def2-TZVP  | DKH2 | ---        | D3BJ | 0.155 | 0.049 | 0.112 | 0.020 | 4.37  | 0.40 | 50 | 60 | 57 |
| B3LYP_DKH2_SVP            | SARC-DKH-TZVP  | DKH-def2-SVP   | DKH2 | ---        | ---  | 0.291 | 0.060 | 0.268 | 0.072 | 11.47 | 3.30 | 61 | 61 | 70 |
| B3LYP_DKH2_SVP_D3BJ       | SARC-DKH-TZVP  | DKH-def2-SVP   | DKH2 | ---        | D3BJ | 0.308 | 0.067 | 0.271 | 0.080 | 11.31 | 3.31 | 66 | 62 | 67 |
| TPSSH_DKH2_SVP            | SARC-DKH-TZVP  | DKH-def2-SVP   | DKH2 | ---        | ---  | 0.299 | 0.064 | 0.273 | 0.074 | 11.71 | 3.28 | 63 | 63 | 73 |
| TPSSH_DKH2_SVP_D3BJ       | SARC-DKH-TZVP  | DKH-def2-SVP   | DKH2 | ---        | D3BJ | 0.296 | 0.063 | 0.277 | 0.076 | 11.45 | 3.29 | 62 | 64 | 69 |
| PBE0_DKH2_SVP_D3BJ        | SARC-DKH-TZVP  | DKH-def2-SVP   | DKH2 | ---        | D3BJ | 0.307 | 0.063 | 0.281 | 0.077 | 11.92 | 3.22 | 65 | 65 | 75 |
| PBE0_DKH2_SVP             | SARC-DKH-TZVP  | DKH-def2-SVP   | DKH2 | ---        | ---  | 0.307 | 0.062 | 0.282 | 0.074 | 11.91 | 3.15 | 64 | 66 | 74 |
| PBE_DKH2_SVP              | SARC-DKH-TZVP  | DKH-def2-SVP   | DKH2 | ---        | ---  | 0.369 | 0.097 | 0.346 | 0.100 | 10.55 | 3.33 | 67 | 67 | 62 |
| BP86_DKH2_SVP             | SARC-DKH-TZVP  | DKH-def2-SVP   | DKH2 | ---        | ---  | 0.390 | 0.094 | 0.355 | 0.107 | 10.48 | 3.26 | 68 | 68 | 61 |
| BP86_DKH2_SVP_D3BJ        | SARC-DKH-TZVP  | DKH-def2-SVP   | DKH2 | ---        | D3BJ | 0.396 | 0.094 | 0.384 | 0.110 | 10.93 | 3.39 | 69 | 69 | 63 |
| PBE_DKH2_SVP_D3BJ         | SARC-DKH-TZVP  | DKH-def2-SVP   | DKH2 | ---        | D3BJ | 0.475 | 0.152 | 0.441 | 0.158 | 11.25 | 3.17 | 70 | 70 | 66 |

|                          |               |              |      |            |      |       |       |       |       |       |      |    |    |    |
|--------------------------|---------------|--------------|------|------------|------|-------|-------|-------|-------|-------|------|----|----|----|
| B3LYP_DKH2_SVP_D3BJ_CPCM | SARC-DKH-TZVP | DKH-def2-SVP | DKH2 | CPCM (inf) | D3BJ | 0.539 | 0.146 | 0.479 | 0.157 | 11.01 | 3.11 | 71 | 71 | 64 |
| BP86_DKH2_SVP_CPCM       | SARC-DKH-TZVP | DKH-def2-SVP | DKH2 | CPCM (inf) | ---  | 0.601 | 0.184 | 0.517 | 0.174 | 12.25 | 3.55 | 74 | 72 | 78 |
| BP86_DKH2_SVP_D3BJ_CPCM  | SARC-DKH-TZVP | DKH-def2-SVP | DKH2 | CPCM (inf) | D3BJ | 0.611 | 0.149 | 0.532 | 0.159 | 11.16 | 3.38 | 75 | 73 | 65 |
| TPSSH_DKH2_SVP_CPCM      | SARC-DKH-TZVP | DKH-def2-SVP | DKH2 | CPCM (inf) | ---  | 0.587 | 0.238 | 0.555 | 0.239 | 11.31 | 3.19 | 72 | 74 | 68 |
| PBE_DKH2_SVP_D3BJ_CPCM   | SARC-DKH-TZVP | DKH-def2-SVP | DKH2 | CPCM (inf) | D3BJ | 0.596 | 0.214 | 0.560 | 0.221 | 12.06 | 3.39 | 73 | 75 | 77 |
| PBE_DKH2_SVP_CPCM        | SARC-DKH-TZVP | DKH-def2-SVP | DKH2 | CPCM (inf) | ---  | 0.625 | 0.212 | 0.567 | 0.225 | 11.60 | 3.11 | 76 | 76 | 71 |
| TPSSH_DKH2_SVP_D3BJ_CPCM | SARC-DKH-TZVP | DKH-def2-SVP | DKH2 | CPCM (inf) | D3BJ | 0.641 | 0.239 | 0.594 | 0.249 | 12.52 | 3.46 | 77 | 77 | 79 |
| PBE0_DKH2_SVP_D3BJ_CPCM  | SARC-DKH-TZVP | DKH-def2-SVP | DKH2 | CPCM (inf) | D3BJ | 0.713 | 0.222 | 0.595 | 0.216 | 11.63 | 3.07 | 80 | 78 | 72 |
| B3LYP_DKH2_SVP_CPCM      | SARC-DKH-TZVP | DKH-def2-SVP | DKH2 | CPCM (inf) | ---  | 0.660 | 0.231 | 0.604 | 0.231 | 14.34 | 2.69 | 78 | 79 | 80 |
| PBE0_DKH2_SVP_CPCM       | SARC-DKH-TZVP | DKH-def2-SVP | DKH2 | CPCM (inf) | ---  | 0.687 | 0.277 | 0.611 | 0.270 | 11.94 | 3.07 | 79 | 80 | 76 |

Table S7: RMSD<sub>all</sub>, RMSD<sub>Pt</sub> and  $\Delta$  ranking of the 80 different methods for complexes where platinum is only bonded to light atoms (C, N, O) (5, 6, 12, 13)

| Name                      | Pt Basis Set   | Ligand Basis Set | Relativistics | Solvation  | Dispersion | RMSD <sub>all</sub> (Å) | Variance of RMSD <sub>all</sub> (Å) | RMSD <sub>Pt</sub> (Å) | Variance of RMSD <sub>Pt</sub> (Å) | $\Delta$ (%) | Variance of $\Delta$ (%) | RMSD <sub>all</sub> rank | RMSD <sub>Pt</sub> rank | $\Delta$ rank |
|---------------------------|----------------|------------------|---------------|------------|------------|-------------------------|-------------------------------------|------------------------|------------------------------------|--------------|--------------------------|--------------------------|-------------------------|---------------|
| PBE0_ZORA_TZVP_D3BJ       | SARC-ZORA-TZVP | ZORA-def2-TZVP   | ZORA          | ---        | D3BJ       | 0.056                   | 0.018                               | 0.035                  | 0.011                              | 0.83         | 0.38                     | 1*                       | 1*                      | 8*            |
| PBE0_ZORA_TZVP            | SARC-ZORA-TZVP | ZORA-def2-TZVP   | ZORA          | ---        | ---        | 0.059                   | 0.018                               | 0.037                  | 0.012                              | 0.82         | 0.38                     | 2*                       | 2*                      | 4*            |
| PBE0_ZORA_TZVP_CPCM       | SARC-ZORA-TZVP | ZORA-def2-TZVP   | ZORA          | CPCM (inf) | ---        | 0.067                   | 0.024                               | 0.043                  | 0.020                              | 0.78         | 0.42                     | 3*                       | 3*                      | 1*            |
| PBE_ZORA_TZVP             | SARC-ZORA-TZVP | ZORA-def2-TZVP   | ZORA          | ---        | ---        | 0.075                   | 0.022                               | 0.047                  | 0.019                              | 1.24         | 0.42                     | 8                        | 4                       | 32            |
| PBE_ZORA_TZVP_D3BJ        | SARC-ZORA-TZVP | ZORA-def2-TZVP   | ZORA          | ---        | D3BJ       | 0.074                   | 0.023                               | 0.048                  | 0.021                              | 1.10         | 0.40                     | 7*                       | 5                       | 25*           |
| PBE0_ZORA_SVP             | SARC-ZORA-TZVP | ZORA-def2-SVP    | ZORA          | ---        | ---        | 0.071                   | 0.020                               | 0.048                  | 0.017                              | 0.90         | 0.39                     | 4*                       | 6                       | 15*           |
| TPSSh_ZORA_TZVP           | SARC-ZORA-TZVP | ZORA-def2-TZVP   | ZORA          | ---        | ---        | 0.075                   | 0.023                               | 0.048                  | 0.020                              | 1.08         | 0.40                     | 9                        | 7                       | 24*           |
| PBE0_ZORA_TZVP_D3BJ_CPCM  | SARC-ZORA-TZVP | ZORA-def2-TZVP   | ZORA          | CPCM (inf) | D3BJ       | 0.073                   | 0.031                               | 0.051                  | 0.027                              | 0.80         | 0.41                     | 6*                       | 8                       | 2*            |
| PBE0_ZORA_SVP_D3BJ        | SARC-ZORA-TZVP | ZORA-def2-SVP    | ZORA          | ---        | D3BJ       | 0.072                   | 0.022                               | 0.051                  | 0.019                              | 0.88         | 0.37                     | 5*                       | 9                       | 11*           |
| TPSSh_ZORA_TZVP_CPCM      | SARC-ZORA-TZVP | ZORA-def2-TZVP   | ZORA          | CPCM (inf) | ---        | 0.077                   | 0.029                               | 0.052                  | 0.027                              | 0.88         | 0.43                     | 13                       | 10                      | 10*           |
| TPSSh_ZORA_TZVP_D3BJ      | SARC-ZORA-TZVP | ZORA-def2-TZVP   | ZORA          | ---        | D3BJ       | 0.078                   | 0.027                               | 0.052                  | 0.024                              | 0.93         | 0.40                     | 14                       | 11                      | 18*           |
| PBE_ZORA_TZVP_CPCM        | SARC-ZORA-TZVP | ZORA-def2-TZVP   | ZORA          | CPCM (inf) | ---        | 0.080                   | 0.030                               | 0.053                  | 0.028                              | 1.02         | 0.46                     | 16                       | 12                      | 20*           |
| PBE_ZORA_TZVP_D3BJ_CPCM   | SARC-ZORA-TZVP | ZORA-def2-TZVP   | ZORA          | CPCM (inf) | D3BJ       | 0.081                   | 0.031                               | 0.053                  | 0.027                              | 0.93         | 0.40                     | 19                       | 13                      | 17*           |
| PBE_ZORA_SVP_D3BJ_CPCM    | SARC-ZORA-TZVP | ZORA-def2-SVP    | ZORA          | CPCM (inf) | D3BJ       | 0.083                   | 0.027                               | 0.053                  | 0.028                              | 0.84         | 0.40                     | 25                       | 14                      | 9*            |
| PBE_ZORA_SVP_D3BJ         | SARC-ZORA-TZVP | ZORA-def2-SVP    | ZORA          | ---        | D3BJ       | 0.083                   | 0.027                               | 0.053                  | 0.025                              | 1.04         | 0.41                     | 24                       | 15                      | 21*           |
| BP86_ZORA_SVP_D3BJ_CPCM   | SARC-ZORA-TZVP | ZORA-def2-SVP    | ZORA          | CPCM (inf) | D3BJ       | 0.085                   | 0.029                               | 0.053                  | 0.028                              | 0.89         | 0.42                     | 30                       | 16                      | 12*           |
| BP86_ZORA_TZVP_D3BJ_CPCM  | SARC-ZORA-TZVP | ZORA-def2-TZVP   | ZORA          | CPCM (inf) | D3BJ       | 0.080                   | 0.030                               | 0.053                  | 0.028                              | 0.92         | 0.43                     | 17                       | 17                      | 16*           |
| TPSSh_ZORA_TZVP_D3BJ_CPCM | SARC-ZORA-TZVP | ZORA-def2-TZVP   | ZORA          | CPCM (inf) | D3BJ       | 0.077                   | 0.030                               | 0.053                  | 0.029                              | 0.81         | 0.41                     | 12                       | 18                      | 3*            |
| BP86_ZORA_SVP_D3BJ        | SARC-ZORA-TZVP | ZORA-def2-SVP    | ZORA          | ---        | D3BJ       | 0.087                   | 0.026                               | 0.054                  | 0.027                              | 1.11         | 0.42                     | 38                       | 19                      | 26*           |
| PBE0_ZORA_SVP_CPCM        | SARC-ZORA-TZVP | ZORA-def2-SVP    | ZORA          | CPCM (inf) | ---        | 0.077                   | 0.028                               | 0.054                  | 0.026                              | 0.82         | 0.41                     | 11                       | 20                      | 5*            |
| PBE_ZORA_SVP              | SARC-ZORA-TZVP | ZORA-def2-SVP    | ZORA          | ---        | ---        | 0.086                   | 0.025                               | 0.055                  | 0.025                              | 1.16         | 0.40                     | 36                       | 21                      | 28*           |
| B3LYP_ZORA_TZVP_D3BJ      | SARC-ZORA-TZVP | ZORA-def2-TZVP   | ZORA          | ---        | D3BJ       | 0.076                   | 0.023                               | 0.055                  | 0.019                              | 1.54         | 0.52                     | 10                       | 22                      | 38            |
| PBE_ZORA_SVP_CPCM         | SARC-ZORA-TZVP | ZORA-def2-SVP    | ZORA          | CPCM (inf) | ---        | 0.086                   | 0.028                               | 0.055                  | 0.028                              | 0.90         | 0.41                     | 35                       | 23                      | 14*           |
| PBE0_ZORA_SVP_D3BJ_CPCM   | SARC-ZORA-TZVP | ZORA-def2-SVP    | ZORA          | CPCM (inf) | D3BJ       | 0.078                   | 0.030                               | 0.056                  | 0.028                              | 0.83         | 0.39                     | 15                       | 24                      | 7*            |
| BP86_ZORA_TZVP_CPCM       | SARC-ZORA-TZVP | ZORA-def2-TZVP   | ZORA          | CPCM (inf) | ---        | 0.083                   | 0.029                               | 0.056                  | 0.028                              | 1.13         | 0.49                     | 21                       | 25                      | 27*           |
| TPSSh_ZORA_SVP_CPCM       | SARC-ZORA-TZVP | ZORA-def2-SVP    | ZORA          | CPCM (inf) | ---        | 0.084                   | 0.029                               | 0.056                  | 0.026                              | 0.89         | 0.45                     | 28                       | 26                      | 13*           |
| BP86_ZORA_TZVP_D3BJ       | SARC-ZORA-TZVP | ZORA-def2-TZVP   | ZORA          | ---        | D3BJ       | 0.083                   | 0.028                               | 0.056                  | 0.027                              | 1.17         | 0.44                     | 23                       | 27                      | 30*           |
| TPSSh_ZORA_SVP_D3BJ       | SARC-ZORA-TZVP | ZORA-def2-SVP    | ZORA          | ---        | D3BJ       | 0.084                   | 0.026                               | 0.057                  | 0.025                              | 0.99         | 0.42                     | 26                       | 28                      | 19*           |
| B3LYP_ZORA_TZVP_D3BJ_CPCM | SARC-ZORA-TZVP | ZORA-def2-TZVP   | ZORA          | CPCM (inf) | D3BJ       | 0.080                   | 0.027                               | 0.057                  | 0.025                              | 1.23         | 0.53                     | 18                       | 29                      | 31            |
| BP86_ZORA_TZVP            | SARC-ZORA-TZVP | ZORA-def2-TZVP   | ZORA          | ---        | ---        | 0.085                   | 0.028                               | 0.057                  | 0.026                              | 1.41         | 0.44                     | 29                       | 30                      | 35            |
| B3LYP_ZORA_SVP_D3BJ_CPCM  | SARC-ZORA-TZVP | ZORA-def2-SVP    | ZORA          | CPCM (inf) | D3BJ       | 0.086                   | 0.026                               | 0.058                  | 0.025                              | 1.16         | 0.50                     | 32                       | 31                      | 29*           |
| B3LYP_ZORA_TZVP_CPCM      | SARC-ZORA-TZVP | ZORA-def2-TZVP   | ZORA          | CPCM (inf) | ---        | 0.083                   | 0.027                               | 0.059                  | 0.024                              | 1.49         | 0.56                     | 22                       | 32                      | 37            |
| BP86_ZORA_SVP             | SARC-ZORA-TZVP | ZORA-def2-SVP    | ZORA          | ---        | ---        | 0.093                   | 0.028                               | 0.059                  | 0.027                              | 1.36         | 0.47                     | 42                       | 33                      | 33            |



|                           |                |                |      |            |      |       |       |       |       |      |      |    |    |     |
|---------------------------|----------------|----------------|------|------------|------|-------|-------|-------|-------|------|------|----|----|-----|
| TPSSh_ZORA_SVP            | SARC-ZORA-TZVP | ZORA-def2-SVP  | ZORA | ---        | ---  | 0.086 | 0.025 | 0.059 | 0.025 | 1.06 | 0.41 | 34 | 34 | 23* |
| BP86_ZORA_SVP_CPCM        | SARC-ZORA-TZVP | ZORA-def2-SVP  | ZORA | CPCM (inf) | ---  | 0.089 | 0.029 | 0.059 | 0.029 | 1.06 | 0.46 | 40 | 35 | 22* |
| TPSSh_ZORA_SVP_D3BJ_CPCM  | SARC-ZORA-TZVP | ZORA-def2-SVP  | ZORA | CPCM (inf) | D3BJ | 0.087 | 0.032 | 0.060 | 0.032 | 0.83 | 0.45 | 37 | 36 | 6*  |
| B3LYP_ZORA_SVP            | SARC-ZORA-TZVP | ZORA-def2-SVP  | ZORA | ---        | ---  | 0.086 | 0.022 | 0.060 | 0.019 | 1.72 | 0.55 | 33 | 37 | 39  |
| B3LYP_ZORA_TZVP           | SARC-ZORA-TZVP | ZORA-def2-TZVP | ZORA | ---        | ---  | 0.082 | 0.024 | 0.061 | 0.019 | 1.81 | 0.58 | 20 | 38 | 40  |
| B3LYP_ZORA_SVP_D3BJ       | SARC-ZORA-TZVP | ZORA-def2-SVP  | ZORA | ---        | D3BJ | 0.084 | 0.024 | 0.061 | 0.022 | 1.47 | 0.52 | 27 | 39 | 36  |
| B3LYP_ZORA_SVP_CPCM       | SARC-ZORA-TZVP | ZORA-def2-SVP  | ZORA | CPCM (inf) | ---  | 0.089 | 0.026 | 0.062 | 0.025 | 1.40 | 0.53 | 39 | 40 | 34  |
| PBE0_DKH2_TZVP_D3BJ_CPCM  | SARC-DKH-TZVP  | DKH-def2-TZVP  | DKH2 | CPCM (inf) | D3BJ | 0.086 | 0.011 | 0.078 | 0.009 | 2.64 | 0.68 | 31 | 41 | 41  |
| PBE0_DKH2_TZVP_D3BJ       | SARC-DKH-TZVP  | DKH-def2-TZVP  | DKH2 | ---        | D3BJ | 0.090 | 0.009 | 0.081 | 0.009 | 2.94 | 0.74 | 41 | 42 | 43  |
| PBE_DKH2_TZVP_D3BJ_CPCM   | SARC-DKH-TZVP  | DKH-def2-TZVP  | DKH2 | CPCM (inf) | D3BJ | 0.097 | 0.010 | 0.084 | 0.009 | 3.35 | 0.59 | 44 | 43 | 47  |
| BP86_DKH2_TZVP_D3BJ_CPCM  | SARC-DKH-TZVP  | DKH-def2-TZVP  | DKH2 | CPCM (inf) | D3BJ | 0.099 | 0.011 | 0.086 | 0.010 | 3.46 | 0.61 | 48 | 44 | 48  |
| PBE0_DKH2_TZVP            | SARC-DKH-TZVP  | DKH-def2-TZVP  | DKH2 | ---        | ---  | 0.095 | 0.011 | 0.086 | 0.011 | 3.07 | 0.73 | 43 | 45 | 44  |
| TPSSh_DKH2_TZVP_D3BJ_CPCM | SARC-DKH-TZVP  | DKH-def2-TZVP  | DKH2 | CPCM (inf) | D3BJ | 0.098 | 0.014 | 0.087 | 0.012 | 3.17 | 0.63 | 47 | 46 | 45  |
| PBE0_DKH2_TZVP_CPCM       | SARC-DKH-TZVP  | DKH-def2-TZVP  | DKH2 | CPCM (inf) | ---  | 0.098 | 0.017 | 0.087 | 0.015 | 2.77 | 0.69 | 46 | 47 | 42  |
| PBE_DKH2_TZVP_D3BJ        | SARC-DKH-TZVP  | DKH-def2-TZVP  | DKH2 | ---        | D3BJ | 0.100 | 0.010 | 0.088 | 0.009 | 3.65 | 0.63 | 50 | 48 | 51  |
| TPSSh_DKH2_TZVP_CPCM      | SARC-DKH-TZVP  | DKH-def2-TZVP  | DKH2 | CPCM (inf) | ---  | 0.100 | 0.013 | 0.089 | 0.011 | 3.28 | 0.63 | 49 | 49 | 46  |
| TPSSh_DKH2_TZVP_D3BJ      | SARC-DKH-TZVP  | DKH-def2-TZVP  | DKH2 | ---        | D3BJ | 0.098 | 0.011 | 0.090 | 0.010 | 3.49 | 0.69 | 45 | 50 | 49  |
| BP86_DKH2_TZVP_D3BJ       | SARC-DKH-TZVP  | DKH-def2-TZVP  | DKH2 | ---        | D3BJ | 0.103 | 0.011 | 0.091 | 0.012 | 3.76 | 0.64 | 52 | 51 | 55  |
| PBE_DKH2_TZVP             | SARC-DKH-TZVP  | DKH-def2-TZVP  | DKH2 | ---        | ---  | 0.105 | 0.010 | 0.093 | 0.011 | 3.80 | 0.62 | 55 | 52 | 56  |
| B3LYP_DKH2_TZVP_D3BJ_CPCM | SARC-DKH-TZVP  | DKH-def2-TZVP  | DKH2 | CPCM (inf) | D3BJ | 0.100 | 0.010 | 0.093 | 0.011 | 3.66 | 0.79 | 51 | 53 | 53  |
| TPSSh_DKH2_TZVP           | SARC-DKH-TZVP  | DKH-def2-TZVP  | DKH2 | ---        | ---  | 0.105 | 0.013 | 0.095 | 0.012 | 3.66 | 0.71 | 54 | 54 | 52  |
| BP86_DKH2_TZVP            | SARC-DKH-TZVP  | DKH-def2-TZVP  | DKH2 | ---        | ---  | 0.110 | 0.013 | 0.098 | 0.012 | 4.00 | 0.67 | 57 | 55 | 58  |
| B3LYP_DKH2_TZVP_D3BJ      | SARC-DKH-TZVP  | DKH-def2-TZVP  | DKH2 | ---        | D3BJ | 0.104 | 0.010 | 0.098 | 0.011 | 4.14 | 0.71 | 53 | 56 | 64  |
| B3LYP_DKH2_TZVP_CPCM      | SARC-DKH-TZVP  | DKH-def2-TZVP  | DKH2 | CPCM (inf) | ---  | 0.107 | 0.012 | 0.099 | 0.013 | 3.88 | 0.81 | 56 | 57 | 57  |
| PBE_DKH2_TZVP_CPCM        | SARC-DKH-TZVP  | DKH-def2-TZVP  | DKH2 | CPCM (inf) | ---  | 0.121 | 0.025 | 0.105 | 0.023 | 3.53 | 0.58 | 60 | 58 | 50  |
| B3LYP_DKH2_TZVP           | SARC-DKH-TZVP  | DKH-def2-TZVP  | DKH2 | ---        | ---  | 0.113 | 0.011 | 0.105 | 0.012 | 4.21 | 0.86 | 58 | 59 | 68  |
| BP86_DKH2_TZVP_CPCM       | SARC-DKH-TZVP  | DKH-def2-TZVP  | DKH2 | CPCM (inf) | ---  | 0.121 | 0.024 | 0.106 | 0.023 | 3.71 | 0.62 | 59 | 60 | 54  |
| BP86_DKH2_SVP             | SARC-DKH-TZVP  | DKH-def2-SVP   | DKH2 | ---        | ---  | 0.148 | 0.037 | 0.121 | 0.058 | 4.25 | 2.58 | 61 | 61 | 70  |
| B3LYP_DKH2_SVP            | SARC-DKH-TZVP  | DKH-def2-SVP   | DKH2 | ---        | ---  | 0.154 | 0.039 | 0.123 | 0.059 | 4.21 | 2.67 | 63 | 62 | 67  |
| BP86_DKH2_SVP_D3BJ        | SARC-DKH-TZVP  | DKH-def2-SVP   | DKH2 | ---        | D3BJ | 0.151 | 0.039 | 0.125 | 0.059 | 4.13 | 2.55 | 62 | 63 | 62  |
| PBE_DKH2_SVP_D3BJ         | SARC-DKH-TZVP  | DKH-def2-SVP   | DKH2 | ---        | D3BJ | 0.155 | 0.039 | 0.125 | 0.059 | 4.29 | 2.52 | 64 | 64 | 72  |
| TPSSh_DKH2_SVP_D3BJ       | SARC-DKH-TZVP  | DKH-def2-SVP   | DKH2 | ---        | D3BJ | 0.159 | 0.038 | 0.130 | 0.060 | 4.42 | 2.58 | 65 | 65 | 74  |
| TPSSh_DKH2_SVP            | SARC-DKH-TZVP  | DKH-def2-SVP   | DKH2 | ---        | ---  | 0.162 | 0.040 | 0.130 | 0.059 | 4.27 | 2.49 | 66 | 66 | 71  |
| PBE0_DKH2_SVP             | SARC-DKH-TZVP  | DKH-def2-SVP   | DKH2 | ---        | ---  | 0.169 | 0.040 | 0.135 | 0.057 | 4.55 | 2.50 | 68 | 67 | 76  |
| PBE0_DKH2_SVP_D3BJ        | SARC-DKH-TZVP  | DKH-def2-SVP   | DKH2 | ---        | D3BJ | 0.168 | 0.039 | 0.137 | 0.059 | 4.62 | 2.52 | 67 | 68 | 77  |
| PBE_DKH2_SVP_D3BJ_CPCM    | SARC-DKH-TZVP  | DKH-def2-SVP   | DKH2 | CPCM (inf) | D3BJ | 0.179 | 0.043 | 0.143 | 0.054 | 4.16 | 2.49 | 69 | 69 | 66  |
| PBE_DKH2_SVP              | SARC-DKH-TZVP  | DKH-def2-SVP   | DKH2 | ---        | ---  | 0.179 | 0.042 | 0.150 | 0.063 | 4.37 | 2.58 | 70 | 70 | 73  |

|                          |               |              |      |            |      |       |       |       |       |      |      |    |    |    |
|--------------------------|---------------|--------------|------|------------|------|-------|-------|-------|-------|------|------|----|----|----|
| BP86_DKH2_SVP_CPCM       | SARC-DKH-TZVP | DKH-def2-SVP | DKH2 | CPCM (inf) | ---  | 0.191 | 0.041 | 0.151 | 0.054 | 4.01 | 2.52 | 72 | 71 | 59 |
| TP5Sh_DKH2_SVP_CPCM      | SARC-DKH-TZVP | DKH-def2-SVP | DKH2 | CPCM (inf) | ---  | 0.193 | 0.041 | 0.152 | 0.055 | 4.15 | 2.46 | 73 | 72 | 65 |
| B3LYP_DKH2_SVP_D3BJ      | SARC-DKH-TZVP | DKH-def2-SVP | DKH2 | ---        | D3BJ | 0.188 | 0.049 | 0.156 | 0.066 | 4.09 | 2.46 | 71 | 73 | 61 |
| PBE0_DKH2_SVP_D3BJ_CPCM  | SARC-DKH-TZVP | DKH-def2-SVP | DKH2 | CPCM (inf) | D3BJ | 0.219 | 0.031 | 0.170 | 0.046 | 4.78 | 2.46 | 75 | 74 | 78 |
| PBE_DKH2_SVP_CPCM        | SARC-DKH-TZVP | DKH-def2-SVP | DKH2 | CPCM (inf) | ---  | 0.217 | 0.028 | 0.176 | 0.043 | 4.23 | 2.48 | 74 | 75 | 69 |
| PBE0_DKH2_SVP_CPCM       | SARC-DKH-TZVP | DKH-def2-SVP | DKH2 | CPCM (inf) | ---  | 0.231 | 0.024 | 0.176 | 0.044 | 4.80 | 2.49 | 76 | 76 | 79 |
| TP5Sh_DKH2_SVP_D3BJ_CPCM | SARC-DKH-TZVP | DKH-def2-SVP | DKH2 | CPCM (inf) | D3BJ | 0.244 | 0.026 | 0.186 | 0.038 | 4.53 | 2.55 | 78 | 77 | 75 |
| BP86_DKH2_SVP_D3BJ_CPCM  | SARC-DKH-TZVP | DKH-def2-SVP | DKH2 | CPCM (inf) | D3BJ | 0.247 | 0.020 | 0.189 | 0.035 | 4.14 | 2.48 | 79 | 78 | 63 |
| B3LYP_DKH2_SVP_D3BJ_CPCM | SARC-DKH-TZVP | DKH-def2-SVP | DKH2 | CPCM (inf) | D3BJ | 0.243 | 0.014 | 0.190 | 0.039 | 4.07 | 2.50 | 77 | 79 | 60 |
| B3LYP_DKH2_SVP_CPCM      | SARC-DKH-TZVP | DKH-def2-SVP | DKH2 | CPCM (inf) | ---  | 0.299 | 0.077 | 0.232 | 0.056 | 7.20 | 2.61 | 80 | 80 | 80 |

Table S8: RMSD<sub>all</sub>, RMSD<sub>Pt</sub> and  $\Delta$  ranking of the 80 different methods for complexes where platinum is not bonded to any light atoms (2, 3, 4, 8, 10, 11)

| Name                      | Pt Basis Set   | Ligand Basis Set | Relativistics | Solvation  | Dispersion | RMSD <sub>all</sub> (Å) | Variance of RMSD <sub>all</sub> (Å) | RMSD <sub>Pt</sub> (Å) | Variance of RMSD <sub>Pt</sub> (Å) | $\Delta$ (%) | Variance of $\Delta$ (%) | RMSD <sub>all</sub> rank | RMSD <sub>Pt</sub> rank | $\Delta$ rank |
|---------------------------|----------------|------------------|---------------|------------|------------|-------------------------|-------------------------------------|------------------------|------------------------------------|--------------|--------------------------|--------------------------|-------------------------|---------------|
| PBE0_ZORA_TZVP_D3BJ_CPCM  | SARC-ZORA-TZVP | ZORA-def2-TZVP   | ZORA          | CPCM (inf) | D3BJ       | 0.060                   | 0.023                               | 0.018                  | 0.002                              | 0.43         | 0.05                     | 1*                       | 1*                      | 1*            |
| PBE0_ZORA_TZVP_CPCM       | SARC-ZORA-TZVP | ZORA-def2-TZVP   | ZORA          | CPCM (inf) | ---        | 0.064                   | 0.023                               | 0.021                  | 0.003                              | 0.49         | 0.06                     | 3*                       | 2                       | 2             |
| PBE0_ZORA_SVP_D3BJ_CPCM   | SARC-ZORA-TZVP | ZORA-def2-SVP    | ZORA          | CPCM (inf) | D3BJ       | 0.061                   | 0.023                               | 0.022                  | 0.002                              | 0.53         | 0.06                     | 2*                       | 3                       | 3             |
| TPSSH_ZORA_TZVP_D3BJ_CPCM | SARC-ZORA-TZVP | ZORA-def2-TZVP   | ZORA          | CPCM (inf) | D3BJ       | 0.072                   | 0.021                               | 0.027                  | 0.002                              | 0.87         | 0.10                     | 7*                       | 4                       | 5             |
| TPSSH_ZORA_TZVP_CPCM      | SARC-ZORA-TZVP | ZORA-def2-TZVP   | ZORA          | CPCM (inf) | ---        | 0.069                   | 0.019                               | 0.029                  | 0.002                              | 1.05         | 0.09                     | 4*                       | 5                       | 10            |
| TPSSH_ZORA_SVP_D3BJ_CPCM  | SARC-ZORA-TZVP | ZORA-def2-SVP    | ZORA          | CPCM (inf) | D3BJ       | 0.070                   | 0.020                               | 0.030                  | 0.002                              | 1.06         | 0.11                     | 5*                       | 6                       | 11            |
| PBE_ZORA_TZVP_D3BJ_CPCM   | SARC-ZORA-TZVP | ZORA-def2-TZVP   | ZORA          | CPCM (inf) | D3BJ       | 0.080                   | 0.019                               | 0.033                  | 0.003                              | 1.22         | 0.18                     | 11*                      | 7                       | 15            |
| PBE0_ZORA_TZVP_D3BJ       | SARC-ZORA-TZVP | ZORA-def2-TZVP   | ZORA          | ---        | D3BJ       | 0.128                   | 0.060                               | 0.033                  | 0.004                              | 0.91         | 0.11                     | 20                       | 8                       | 7             |
| TPSSH_ZORA_SVP_CPCM       | SARC-ZORA-TZVP | ZORA-def2-SVP    | ZORA          | CPCM (inf) | ---        | 0.070                   | 0.018                               | 0.034                  | 0.001                              | 1.29         | 0.07                     | 6*                       | 9                       | 17            |
| PBE0_ZORA_SVP_D3BJ        | SARC-ZORA-TZVP | ZORA-def2-SVP    | ZORA          | ---        | D3BJ       | 0.142                   | 0.060                               | 0.035                  | 0.004                              | 0.92         | 0.14                     | 24                       | 10                      | 8             |
| PBE_ZORA_TZVP_CPCM        | SARC-ZORA-TZVP | ZORA-def2-TZVP   | ZORA          | CPCM (inf) | ---        | 0.078                   | 0.017                               | 0.035                  | 0.003                              | 1.40         | 0.17                     | 9*                       | 11                      | 22            |
| PBE0_ZORA_TZVP            | SARC-ZORA-TZVP | ZORA-def2-TZVP   | ZORA          | ---        | ---        | 0.140                   | 0.062                               | 0.037                  | 0.005                              | 0.91         | 0.13                     | 21                       | 12                      | 6             |
| BP86_ZORA_TZVP_D3BJ_CPCM  | SARC-ZORA-TZVP | ZORA-def2-TZVP   | ZORA          | CPCM (inf) | D3BJ       | 0.164                   | 0.077                               | 0.037                  | 0.004                              | 1.30         | 0.19                     | 38                       | 13                      | 18            |
| PBE0_ZORA_SVP             | SARC-ZORA-TZVP | ZORA-def2-SVP    | ZORA          | ---        | ---        | 0.145                   | 0.062                               | 0.038                  | 0.003                              | 0.98         | 0.17                     | 26                       | 14                      | 9             |
| PBE0_ZORA_SVP_CPCM        | SARC-ZORA-TZVP | ZORA-def2-SVP    | ZORA          | CPCM (inf) | ---        | 0.168                   | 0.115                               | 0.038                  | 0.013                              | 0.71         | 0.04                     | 40                       | 15                      | 4             |
| PBE_ZORA_SVP_D3BJ_CPCM    | SARC-ZORA-TZVP | ZORA-def2-SVP    | ZORA          | CPCM (inf) | D3BJ       | 0.078                   | 0.019                               | 0.039                  | 0.003                              | 1.41         | 0.16                     | 10*                      | 16                      | 23            |
| BP86_ZORA_TZVP_CPCM       | SARC-ZORA-TZVP | ZORA-def2-TZVP   | ZORA          | CPCM (inf) | ---        | 0.084                   | 0.017                               | 0.039                  | 0.003                              | 1.64         | 0.17                     | 14                       | 17                      | 31            |
| TPSSH_ZORA_TZVP_D3BJ      | SARC-ZORA-TZVP | ZORA-def2-TZVP   | ZORA          | ---        | D3BJ       | 0.142                   | 0.060                               | 0.040                  | 0.002                              | 1.11         | 0.26                     | 23                       | 18                      | 12            |
| PBE_ZORA_SVP_CPCM         | SARC-ZORA-TZVP | ZORA-def2-SVP    | ZORA          | CPCM (inf) | ---        | 0.078                   | 0.018                               | 0.041                  | 0.003                              | 1.61         | 0.15                     | 8*                       | 19                      | 30            |
| BP86_ZORA_SVP_D3BJ_CPCM   | SARC-ZORA-TZVP | ZORA-def2-SVP    | ZORA          | CPCM (inf) | D3BJ       | 0.083                   | 0.019                               | 0.041                  | 0.003                              | 1.49         | 0.18                     | 13*                      | 20                      | 26            |
| TPSSH_ZORA_SVP_D3BJ       | SARC-ZORA-TZVP | ZORA-def2-SVP    | ZORA          | ---        | D3BJ       | 0.147                   | 0.062                               | 0.042                  | 0.002                              | 1.15         | 0.29                     | 28                       | 21                      | 14            |
| B3LYP_ZORA_TZVP_D3BJ_CPCM | SARC-ZORA-TZVP | ZORA-def2-TZVP   | ZORA          | CPCM (inf) | D3BJ       | 0.086                   | 0.019                               | 0.043                  | 0.002                              | 1.72         | 0.12                     | 17                       | 22                      | 32            |
| TPSSH_ZORA_TZVP           | SARC-ZORA-TZVP | ZORA-def2-TZVP   | ZORA          | ---        | ---        | 0.145                   | 0.061                               | 0.043                  | 0.002                              | 1.15         | 0.30                     | 27                       | 23                      | 13            |
| PBE_ZORA_TZVP_D3BJ        | SARC-ZORA-TZVP | ZORA-def2-TZVP   | ZORA          | ---        | D3BJ       | 0.141                   | 0.061                               | 0.044                  | 0.003                              | 1.28         | 0.40                     | 22                       | 24                      | 16            |
| BP86_ZORA_TZVP_D3BJ       | SARC-ZORA-TZVP | ZORA-def2-TZVP   | ZORA          | ---        | D3BJ       | 0.145                   | 0.060                               | 0.045                  | 0.004                              | 1.35         | 0.41                     | 25                       | 25                      | 21            |
| B3LYP_ZORA_SVP_D3BJ_CPCM  | SARC-ZORA-TZVP | ZORA-def2-SVP    | ZORA          | CPCM (inf) | D3BJ       | 0.083                   | 0.018                               | 0.045                  | 0.002                              | 1.84         | 0.13                     | 12*                      | 26                      | 35            |
| TPSSH_ZORA_SVP            | SARC-ZORA-TZVP | ZORA-def2-SVP    | ZORA          | ---        | ---        | 0.153                   | 0.062                               | 0.046                  | 0.001                              | 1.31         | 0.29                     | 31                       | 27                      | 19            |
| PBE_ZORA_TZVP             | SARC-ZORA-TZVP | ZORA-def2-TZVP   | ZORA          | ---        | ---        | 0.148                   | 0.059                               | 0.047                  | 0.003                              | 1.34         | 0.44                     | 29                       | 28                      | 20            |
| BP86_ZORA_SVP_D3BJ        | SARC-ZORA-TZVP | ZORA-def2-SVP    | ZORA          | ---        | D3BJ       | 0.156                   | 0.061                               | 0.048                  | 0.004                              | 1.46         | 0.40                     | 34                       | 29                      | 25            |
| BP86_ZORA_SVP_CPCM        | SARC-ZORA-TZVP | ZORA-def2-SVP    | ZORA          | CPCM (inf) | ---        | 0.085                   | 0.015                               | 0.048                  | 0.002                              | 1.86         | 0.15                     | 15                       | 30                      | 36            |
| PBE_ZORA_SVP_D3BJ         | SARC-ZORA-TZVP | ZORA-def2-SVP    | ZORA          | ---        | D3BJ       | 0.124                   | 0.038                               | 0.048                  | 0.004                              | 1.42         | 0.40                     | 19                       | 31                      | 24            |

|                           |                |                |      |            |      |       |       |       |       |       |      |    |    |    |
|---------------------------|----------------|----------------|------|------------|------|-------|-------|-------|-------|-------|------|----|----|----|
| B3LYP_ZORA_TZVP_CPCM      | SARC-ZORA-TZVP | ZORA-def2-TZVP | ZORA | CPCM (inf) | ---  | 0.092 | 0.018 | 0.049 | 0.002 | 2.14  | 0.10 | 18 | 32 | 38 |
| PBE_ZORA_SVP              | SARC-ZORA-TZVP | ZORA-def2-SVP  | ZORA | ---        | ---  | 0.155 | 0.061 | 0.050 | 0.003 | 1.53  | 0.39 | 33 | 33 | 28 |
| BP86_ZORA_TZVP            | SARC-ZORA-TZVP | ZORA-def2-TZVP | ZORA | ---        | ---  | 0.148 | 0.056 | 0.050 | 0.004 | 1.51  | 0.44 | 30 | 34 | 27 |
| B3LYP_ZORA_TZVP_D3BJ      | SARC-ZORA-TZVP | ZORA-def2-TZVP | ZORA | ---        | D3BJ | 0.154 | 0.058 | 0.051 | 0.004 | 1.57  | 0.45 | 32 | 35 | 29 |
| B3LYP_ZORA_SVP_D3BJ       | SARC-ZORA-TZVP | ZORA-def2-SVP  | ZORA | ---        | D3BJ | 0.160 | 0.060 | 0.052 | 0.004 | 1.78  | 0.39 | 37 | 36 | 34 |
| BP86_ZORA_SVP             | SARC-ZORA-TZVP | ZORA-def2-SVP  | ZORA | ---        | ---  | 0.157 | 0.059 | 0.055 | 0.003 | 1.78  | 0.41 | 35 | 37 | 33 |
| B3LYP_ZORA_SVP_CPCM       | SARC-ZORA-TZVP | ZORA-def2-SVP  | ZORA | CPCM (inf) | ---  | 0.086 | 0.014 | 0.055 | 0.002 | 2.25  | 0.10 | 16 | 38 | 40 |
| B3LYP_ZORA_TZVP           | SARC-ZORA-TZVP | ZORA-def2-TZVP | ZORA | ---        | ---  | 0.157 | 0.055 | 0.059 | 0.004 | 1.97  | 0.41 | 36 | 39 | 37 |
| B3LYP_ZORA_SVP            | SARC-ZORA-TZVP | ZORA-def2-SVP  | ZORA | ---        | ---  | 0.167 | 0.061 | 0.061 | 0.003 | 2.20  | 0.36 | 39 | 40 | 39 |
| BP86_DKH2_TZVP_D3BJ       | SARC-DKH-TZVP  | DKH-def2-TZVP  | DKH2 | ---        | D3BJ | 0.265 | 0.072 | 0.114 | 0.010 | 4.59  | 0.30 | 42 | 41 | 41 |
| BP86_DKH2_TZVP_D3BJ_CPCM  | SARC-DKH-TZVP  | DKH-def2-TZVP  | DKH2 | CPCM (inf) | D3BJ | 0.265 | 0.072 | 0.114 | 0.008 | 4.77  | 0.28 | 44 | 42 | 46 |
| BP86_DKH2_TZVP_CPCM       | SARC-DKH-TZVP  | DKH-def2-TZVP  | DKH2 | CPCM (inf) | ---  | 0.263 | 0.077 | 0.116 | 0.009 | 4.87  | 0.35 | 41 | 43 | 48 |
| PBE_DKH2_TZVP_D3BJ_CPCM   | SARC-DKH-TZVP  | DKH-def2-TZVP  | DKH2 | CPCM (inf) | D3BJ | 0.266 | 0.070 | 0.118 | 0.009 | 4.86  | 0.27 | 45 | 44 | 47 |
| PBE_DKH2_TZVP_CPCM        | SARC-DKH-TZVP  | DKH-def2-TZVP  | DKH2 | CPCM (inf) | ---  | 0.265 | 0.070 | 0.118 | 0.009 | 4.94  | 0.29 | 43 | 45 | 52 |
| TPSSH_DKH2_TZVP_CPCM      | SARC-DKH-TZVP  | DKH-def2-TZVP  | DKH2 | CPCM (inf) | ---  | 0.278 | 0.073 | 0.118 | 0.008 | 5.17  | 0.29 | 47 | 46 | 59 |
| B3LYP_DKH2_TZVP_D3BJ_CPCM | SARC-DKH-TZVP  | DKH-def2-TZVP  | DKH2 | CPCM (inf) | D3BJ | 0.343 | 0.108 | 0.120 | 0.014 | 4.88  | 0.34 | 51 | 47 | 50 |
| B3LYP_DKH2_TZVP_D3BJ      | SARC-DKH-TZVP  | DKH-def2-TZVP  | DKH2 | ---        | D3BJ | 0.336 | 0.113 | 0.121 | 0.016 | 4.75  | 0.35 | 49 | 48 | 45 |
| PBE0_DKH2_TZVP_CPCM       | SARC-DKH-TZVP  | DKH-def2-TZVP  | DKH2 | CPCM (inf) | ---  | 0.277 | 0.070 | 0.122 | 0.007 | 5.24  | 0.25 | 46 | 49 | 60 |
| BP86_DKH2_TZVP            | SARC-DKH-TZVP  | DKH-def2-TZVP  | DKH2 | ---        | ---  | 0.347 | 0.117 | 0.122 | 0.018 | 4.70  | 0.32 | 55 | 50 | 43 |
| B3LYP_DKH2_TZVP_CPCM      | SARC-DKH-TZVP  | DKH-def2-TZVP  | DKH2 | CPCM (inf) | ---  | 0.360 | 0.121 | 0.123 | 0.016 | 5.02  | 0.42 | 59 | 51 | 54 |
| B3LYP_DKH2_TZVP           | SARC-DKH-TZVP  | DKH-def2-TZVP  | DKH2 | ---        | ---  | 0.343 | 0.117 | 0.124 | 0.019 | 4.88  | 0.43 | 52 | 52 | 49 |
| PBE_DKH2_TZVP_D3BJ        | SARC-DKH-TZVP  | DKH-def2-TZVP  | DKH2 | ---        | D3BJ | 0.348 | 0.111 | 0.124 | 0.017 | 4.67  | 0.29 | 57 | 53 | 42 |
| TPSSH_DKH2_TZVP_D3BJ_CPCM | SARC-DKH-TZVP  | DKH-def2-TZVP  | DKH2 | CPCM (inf) | D3BJ | 0.326 | 0.092 | 0.125 | 0.013 | 5.04  | 0.25 | 48 | 54 | 56 |
| TPSSH_DKH2_TZVP_D3BJ      | SARC-DKH-TZVP  | DKH-def2-TZVP  | DKH2 | ---        | D3BJ | 0.348 | 0.112 | 0.126 | 0.016 | 4.88  | 0.26 | 56 | 55 | 51 |
| PBE_DKH2_TZVP             | SARC-DKH-TZVP  | DKH-def2-TZVP  | DKH2 | ---        | ---  | 0.344 | 0.118 | 0.126 | 0.018 | 4.72  | 0.31 | 53 | 56 | 44 |
| PBE0_DKH2_TZVP_D3BJ       | SARC-DKH-TZVP  | DKH-def2-TZVP  | DKH2 | ---        | D3BJ | 0.345 | 0.110 | 0.129 | 0.014 | 5.03  | 0.26 | 54 | 57 | 55 |
| PBE0_DKH2_TZVP_D3BJ_CPCM  | SARC-DKH-TZVP  | DKH-def2-TZVP  | DKH2 | CPCM (inf) | D3BJ | 0.337 | 0.103 | 0.129 | 0.012 | 5.15  | 0.24 | 50 | 58 | 58 |
| TPSSH_DKH2_TZVP           | SARC-DKH-TZVP  | DKH-def2-TZVP  | DKH2 | ---        | ---  | 0.355 | 0.110 | 0.130 | 0.017 | 4.97  | 0.28 | 58 | 59 | 53 |
| PBE0_DKH2_TZVP            | SARC-DKH-TZVP  | DKH-def2-TZVP  | DKH2 | ---        | ---  | 0.363 | 0.111 | 0.131 | 0.016 | 5.08  | 0.25 | 60 | 60 | 57 |
| TPSSH_DKH2_SVP_D3BJ       | SARC-DKH-TZVP  | DKH-def2-SVP   | DKH2 | ---        | D3BJ | 0.636 | 0.147 | 0.350 | 0.035 | 15.32 | 1.57 | 63 | 61 | 75 |
| TPSSH_DKH2_SVP            | SARC-DKH-TZVP  | DKH-def2-SVP   | DKH2 | ---        | ---  | 0.682 | 0.146 | 0.351 | 0.034 | 15.13 | 1.68 | 66 | 62 | 74 |
| PBE0_DKH2_SVP_D3BJ        | SARC-DKH-TZVP  | DKH-def2-SVP   | DKH2 | ---        | D3BJ | 0.744 | 0.165 | 0.358 | 0.035 | 15.35 | 1.71 | 72 | 63 | 77 |
| B3LYP_DKH2_SVP            | SARC-DKH-TZVP  | DKH-def2-SVP   | DKH2 | ---        | ---  | 0.687 | 0.163 | 0.358 | 0.037 | 16.08 | 2.30 | 67 | 64 | 80 |
| B3LYP_DKH2_SVP_D3BJ       | SARC-DKH-TZVP  | DKH-def2-SVP   | DKH2 | ---        | D3BJ | 0.672 | 0.171 | 0.359 | 0.035 | 15.34 | 1.74 | 65 | 65 | 76 |
| PBE0_DKH2_SVP             | SARC-DKH-TZVP  | DKH-def2-SVP   | DKH2 | ---        | ---  | 0.707 | 0.167 | 0.371 | 0.039 | 15.50 | 1.80 | 69 | 66 | 78 |
| BP86_DKH2_SVP_D3BJ        | SARC-DKH-TZVP  | DKH-def2-SVP   | DKH2 | ---        | D3BJ | 0.572 | 0.036 | 0.420 | 0.059 | 12.79 | 1.98 | 61 | 67 | 63 |
| BP86_DKH2_SVP             | SARC-DKH-TZVP  | DKH-def2-SVP   | DKH2 | ---        | ---  | 0.725 | 0.159 | 0.436 | 0.063 | 14.33 | 2.03 | 71 | 68 | 71 |

|                          |               |              |      |            |      |       |       |       |       |       |      |    |    |    |
|--------------------------|---------------|--------------|------|------------|------|-------|-------|-------|-------|-------|------|----|----|----|
| PBE_DKH2_SVP             | SARC-DKH-TZVP | DKH-def2-SVP | DKH2 | ---        | ---  | 0.633 | 0.061 | 0.490 | 0.065 | 12.43 | 2.06 | 62 | 69 | 62 |
| BP86_DKH2_SVP_D3BJ_CPCM  | SARC-DKH-TZVP | DKH-def2-SVP | DKH2 | CPCM (inf) | D3BJ | 0.695 | 0.110 | 0.509 | 0.136 | 12.16 | 1.87 | 68 | 70 | 61 |
| PBE_DKH2_SVP_D3BJ        | SARC-DKH-TZVP | DKH-def2-SVP | DKH2 | ---        | D3BJ | 0.667 | 0.103 | 0.510 | 0.135 | 13.12 | 1.85 | 64 | 71 | 66 |
| BP86_DKH2_SVP_CPCM       | SARC-DKH-TZVP | DKH-def2-SVP | DKH2 | CPCM (inf) | ---  | 0.714 | 0.123 | 0.543 | 0.146 | 14.09 | 1.77 | 70 | 72 | 70 |
| B3LYP_DKH2_SVP_D3BJ_CPCM | SARC-DKH-TZVP | DKH-def2-SVP | DKH2 | CPCM (inf) | D3BJ | 0.754 | 0.119 | 0.550 | 0.139 | 12.88 | 1.68 | 73 | 73 | 64 |
| PBE0_DKH2_SVP_D3BJ_CPCM  | SARC-DKH-TZVP | DKH-def2-SVP | DKH2 | CPCM (inf) | D3BJ | 0.789 | 0.163 | 0.587 | 0.206 | 13.07 | 1.77 | 75 | 74 | 65 |
| TPSSH_DKH2_SVP_CPCM      | SARC-DKH-TZVP | DKH-def2-SVP | DKH2 | CPCM (inf) | ---  | 0.941 | 0.204 | 0.610 | 0.232 | 14.77 | 1.60 | 79 | 75 | 73 |
| B3LYP_DKH2_SVP_CPCM      | SARC-DKH-TZVP | DKH-def2-SVP | DKH2 | CPCM (inf) | ---  | 0.983 | 0.215 | 0.612 | 0.238 | 15.59 | 1.71 | 80 | 76 | 79 |
| TPSSH_DKH2_SVP_D3BJ_CPCM | SARC-DKH-TZVP | DKH-def2-SVP | DKH2 | CPCM (inf) | D3BJ | 0.852 | 0.214 | 0.626 | 0.235 | 14.41 | 1.99 | 77 | 77 | 72 |
| PBE_DKH2_SVP_CPCM        | SARC-DKH-TZVP | DKH-def2-SVP | DKH2 | CPCM (inf) | ---  | 0.844 | 0.182 | 0.626 | 0.207 | 13.52 | 1.69 | 76 | 78 | 67 |
| PBE_DKH2_SVP_D3BJ_CPCM   | SARC-DKH-TZVP | DKH-def2-SVP | DKH2 | CPCM (inf) | D3BJ | 0.783 | 0.174 | 0.626 | 0.203 | 13.72 | 2.05 | 74 | 79 | 68 |
| PBE0_DKH2_SVP_CPCM       | SARC-DKH-TZVP | DKH-def2-SVP | DKH2 | CPCM (inf) | ---  | 0.901 | 0.237 | 0.679 | 0.270 | 13.89 | 1.69 | 78 | 80 | 69 |

Table S9: xyz coordinates of tetrakis(triphenylphosphine)platinum(0) as calculated by PBEO / ZORA / TZVP / CPCM

---

|    |              |              |              |
|----|--------------|--------------|--------------|
| Pt | 0.011787155  | 0.006499722  | -0.033693495 |
| P  | 1.272977904  | -1.871264692 | 0.731415949  |
| P  | 1.500645433  | 1.872053086  | -0.249796191 |
| P  | -1.488808662 | 0.54743056   | 1.740220186  |
| P  | -1.03541824  | -0.304471173 | -2.141699253 |
| C  | 2.902448218  | -2.265628057 | -0.05703262  |
| C  | 2.999855671  | -2.172284596 | -1.443706911 |
| C  | 4.014879534  | -2.733921279 | 0.643938116  |
| C  | 4.161997106  | -2.526236336 | -2.113399643 |
| C  | 5.186093452  | -3.074325767 | -0.019608121 |
| C  | 5.265959769  | -2.972006622 | -1.400946487 |
| H  | 2.146793694  | -1.825683434 | -2.013080432 |
| H  | 3.975989694  | -2.844912449 | 1.719635058  |
| H  | 4.204401747  | -2.445507321 | -3.194161935 |
| H  | 6.037869295  | -3.429230892 | 0.550427522  |
| H  | 6.180515811  | -3.240052514 | -1.918167559 |
| C  | 0.486656516  | -3.543877779 | 0.620047533  |
| C  | -0.893375547 | -3.640240126 | 0.771589636  |
| C  | 1.215527006  | -4.717512029 | 0.428144266  |
| C  | -1.534837035 | -4.870037211 | 0.740458418  |
| C  | 0.575865569  | -5.948869997 | 0.381814009  |
| C  | -0.801023192 | -6.030655685 | 0.539268517  |
| H  | -1.469140847 | -2.734973186 | 0.920378229  |
| H  | 2.291270189  | -4.679758317 | 0.307330795  |
| H  | -2.610981325 | -4.918278265 | 0.867217245  |
| H  | 1.159546711  | -6.849128493 | 0.222499088  |
| H  | -1.29865428  | -6.993403507 | 0.50240652   |
| C  | 1.762775804  | -1.916424771 | 2.510204429  |
| C  | 2.764211676  | -1.057429832 | 2.968739652  |
| C  | 1.154855673  | -2.768343032 | 3.430670302  |
| C  | 3.157939713  | -1.065519986 | 4.297188669  |
| C  | 1.535144108  | -2.763065307 | 4.767190004  |
| C  | 2.542250413  | -1.917443191 | 5.205476182  |
| H  | 3.249839868  | -0.376990482 | 2.279832594  |
| H  | 0.37662887   | -3.449749029 | 3.111416634  |
| H  | 3.945371149  | -0.395642674 | 4.624182581  |
| H  | 1.042504483  | -3.43223443  | 5.464373467  |
| H  | 2.846253735  | -1.920251633 | 6.246362459  |
| C  | 2.354602045  | 2.197795936  | -1.862146306 |
| C  | 2.843996295  | 1.107062357  | -2.575327183 |
| C  | 2.625574316  | 3.474736271  | -2.354754891 |
| C  | 3.625951158  | 1.274216779  | -3.708405189 |
| C  | 3.389868409  | 3.647390708  | -3.501421676 |
| C  | 3.90695376   | 2.549556865  | -4.174815652 |
| H  | 2.616548894  | 0.109553833  | -2.226126327 |
| H  | 2.24701844   | 4.351637686  | -1.846113071 |
| H  | 4.006529819  | 0.403448365  | -4.231530699 |
| H  | 3.585559308  | 4.650587147  | -3.864900444 |
| H  | 4.512984322  | 2.688147086  | -5.063378978 |
| C  | 0.849195635  | 3.560726948  | 0.112875525  |
| C  | 1.656286813  | 4.634463273  | 0.498613971  |
| C  | -0.506687399 | 3.796147155  | -0.075284544 |
| C  | 1.115112679  | 5.896592194  | 0.690996092  |
| C  | -1.053068076 | 5.060173235  | 0.1018481    |
| C  | -0.242356922 | 6.115524079  | 0.489912555  |
| H  | 2.719129584  | 4.490958478  | 0.650170271  |
| H  | -1.142357103 | 2.965947172  | -0.35081725  |

|   |              |              |              |
|---|--------------|--------------|--------------|
| H | 1.759143582  | 6.714772389  | 0.994601989  |
| H | -2.115862202 | 5.213620279  | -0.051315827 |
| H | -0.663325435 | 7.10365628   | 0.639753855  |
| C | 2.998871194  | 1.867396419  | 0.833814149  |
| C | 2.909740623  | 2.342445901  | 2.143113327  |
| C | 4.221888138  | 1.351180322  | 0.405721782  |
| C | 4.009495093  | 2.325238942  | 2.987096392  |
| C | 5.321052973  | 1.320915119  | 1.254231864  |
| C | 5.223005145  | 1.814523852  | 2.547096784  |
| H | 1.971839908  | 2.738189196  | 2.51157692   |
| H | 4.33150715   | 0.972006966  | -0.602656203 |
| H | 3.913198368  | 2.708957156  | 3.997059798  |
| H | 6.260745749  | 0.915033619  | 0.895266109  |
| H | 6.083432018  | 1.799510227  | 3.206760124  |
| C | -0.770595141 | 1.6076301    | 3.06922647   |
| C | -1.152598147 | 2.938002927  | 3.249666236  |
| C | 0.233334649  | 1.100686201  | 3.895426322  |
| C | -0.576055865 | 3.719528332  | 4.241836776  |
| C | 0.78794237   | 1.869520418  | 4.907779581  |
| C | 0.384024177  | 3.184304441  | 5.088641808  |
| H | -1.907446744 | 3.379265172  | 2.612889545  |
| H | 0.607088709  | 0.096879976  | 3.740962524  |
| H | -0.88908751  | 4.751877435  | 4.35570608   |
| H | 1.55420787   | 1.440153458  | 5.543767626  |
| H | 0.822728519  | 3.790439193  | 5.873490729  |
| C | -3.073113033 | 1.458777949  | 1.440390106  |
| C | -3.446575623 | 1.839713294  | 0.162858145  |
| C | -3.944088992 | 1.741423334  | 2.497469119  |
| C | -4.645824212 | 2.50370558   | -0.072783767 |
| C | -5.137863626 | 2.405134398  | 2.273469476  |
| C | -5.492448186 | 2.791982056  | 0.984336867  |
| H | -2.794636706 | 1.589069099  | -0.662111621 |
| H | -3.686834549 | 1.439429241  | 3.506691673  |
| H | -4.914821099 | 2.787205751  | -1.084302514 |
| H | -5.7983375   | 2.619998205  | 3.106523462  |
| H | -6.429078876 | 3.309897333  | 0.809608946  |
| C | -2.283771624 | -0.817917474 | 2.720599793  |
| C | -3.341467091 | -1.488318286 | 2.098887366  |
| C | -1.935498111 | -1.212410423 | 4.008926841  |
| C | -4.018451612 | -2.516565281 | 2.732197631  |
| C | -2.611079556 | -2.24748815  | 4.647368241  |
| C | -3.65232419  | -2.906538954 | 4.014798706  |
| H | -3.655378972 | -1.18848394  | 1.106148672  |
| H | -1.143321435 | -0.711083721 | 4.546047515  |
| H | -4.838277356 | -3.011633734 | 2.222714506  |
| H | -2.318300117 | -2.530204552 | 5.652929226  |
| H | -4.179493666 | -3.710444607 | 4.516311212  |
| C | -0.756423401 | 1.042973634  | -3.369723944 |
| C | 0.111112868  | 0.885535658  | -4.449633644 |
| C | -1.370752088 | 2.286392102  | -3.207358011 |
| C | 0.324396326  | 1.915714117  | -5.355023633 |
| C | -1.162803009 | 3.317656188  | -4.110345819 |
| C | -0.318197541 | 3.134075601  | -5.196312744 |
| H | 0.62777655   | -0.05406626  | -4.598107436 |
| H | -2.041100229 | 2.462157599  | -2.37629203  |
| H | 1.002325951  | 1.761548467  | -6.187287173 |
| H | -1.667220286 | 4.266498916  | -3.963622498 |
| H | -0.156867541 | 3.936658441  | -5.907367995 |
| C | -0.742110949 | -1.793953083 | -3.216395102 |
| C | -0.102241807 | -2.913178633 | -2.708354032 |
| C | -1.273645812 | -1.868390642 | -4.508163257 |
| C | 0.033439394  | -4.074458457 | -3.462765696 |

|   |              |              |              |
|---|--------------|--------------|--------------|
| C | -1.136392172 | -3.01732945  | -5.268034951 |
| C | -0.477915675 | -4.127615301 | -4.748092528 |
| H | 0.277062465  | -2.889150238 | -1.697641406 |
| H | -1.806550196 | -1.022459014 | -4.926550142 |
| H | 0.539242095  | -4.934581566 | -3.037491323 |
| H | -1.551299185 | -3.05089955  | -6.26967414  |
| H | -0.3739672   | -5.028199994 | -5.343197748 |
| C | -2.881292496 | -0.511072689 | -2.224331437 |
| C | -3.740050349 | 0.19280336   | -3.064820127 |
| C | -3.416568955 | -1.541042679 | -1.451333229 |
| C | -5.096542374 | -0.108149018 | -3.108516198 |
| C | -4.76586408  | -1.852440153 | -1.501367874 |
| C | -5.616748747 | -1.128494979 | -2.327308155 |
| H | -3.361594994 | 0.980599072  | -3.703138947 |
| H | -2.759339268 | -2.118946911 | -0.811232067 |
| H | -5.746545164 | 0.459200444  | -3.766055874 |
| H | -5.153979746 | -2.661847209 | -0.892162417 |
| H | -6.674704493 | -1.363034823 | -2.364847034 |

---



Table S10: xyz coordinates of tetrakis(triphenylphosphine)platinum(0) as calculated by PBE0 / ZORA / TZVP / D3BJ / CPCM

---

|    |              |              |              |
|----|--------------|--------------|--------------|
| Pt | 0.017044347  | -0.012718859 | -0.018591223 |
| P  | 1.234281252  | -1.855512616 | 0.745432302  |
| P  | 1.463999109  | 1.820626909  | -0.242261268 |
| P  | -1.43958281  | 0.561404369  | 1.720973936  |
| P  | -0.989028223 | -0.304774424 | -2.09666551  |
| C  | 2.82765103   | -2.252860942 | -0.084488722 |
| C  | 2.866321288  | -2.176665372 | -1.474646259 |
| C  | 3.971744768  | -2.685529237 | 0.58391743   |
| C  | 4.00955511   | -2.513193245 | -2.182118392 |
| C  | 5.125757638  | -3.00385999  | -0.118845427 |
| C  | 5.150307442  | -2.919080437 | -1.503677812 |
| H  | 1.984139551  | -1.848785609 | -2.009817767 |
| H  | 3.97060127   | -2.779547033 | 1.661924869  |
| H  | 4.010704271  | -2.444950106 | -3.264423598 |
| H  | 6.008393358  | -3.326690668 | 0.422150051  |
| H  | 6.052381075  | -3.169026798 | -2.050610492 |
| C  | 0.418723167  | -3.504024129 | 0.658614566  |
| C  | -0.948625523 | -3.575157984 | 0.911206449  |
| C  | 1.103806638  | -4.678071341 | 0.353594439  |
| C  | -1.621769011 | -4.785279264 | 0.860529625  |
| C  | 0.429214462  | -5.889669798 | 0.286371981  |
| C  | -0.934459649 | -5.948007496 | 0.538276823  |
| H  | -1.487557126 | -2.667356295 | 1.150416547  |
| H  | 2.167726175  | -4.651710912 | 0.152251182  |
| H  | -2.686381542 | -4.815224428 | 1.064412345  |
| H  | 0.974119921  | -6.792344881 | 0.032785816  |
| H  | -1.459216202 | -6.895002958 | 0.481284955  |
| C  | 1.75311209   | -1.883586006 | 2.506011374  |
| C  | 2.756741143  | -1.013587374 | 2.936501162  |
| C  | 1.147957544  | -2.713796437 | 3.446617084  |
| C  | 3.150727663  | -0.984891353 | 4.263234927  |
| C  | 1.524308016  | -2.665890155 | 4.782714685  |
| C  | 2.529604172  | -1.80567804  | 5.196199708  |
| H  | 3.235459267  | -0.350998563 | 2.227562804  |
| H  | 0.368583814  | -3.400718785 | 3.144558871  |
| H  | 3.935396858  | -0.303614818 | 4.570781861  |
| H  | 1.027914421  | -3.310493391 | 5.499786677  |
| H  | 2.827628611  | -1.772455014 | 6.238050634  |
| C  | 2.308215686  | 2.134638788  | -1.846813813 |
| C  | 2.87790904   | 1.048151971  | -2.504314328 |
| C  | 2.475824495  | 3.401734818  | -2.39970294  |
| C  | 3.641094212  | 1.216815725  | -3.64765615  |
| C  | 3.218511499  | 3.572756968  | -3.559971838 |
| C  | 3.817184631  | 2.48580142   | -4.180016439 |
| H  | 2.723361846  | 0.055896132  | -2.104778543 |
| H  | 2.027202765  | 4.267581778  | -1.930261083 |
| H  | 4.085683526  | 0.352320162  | -4.128851204 |
| H  | 3.330074837  | 4.566653233  | -3.979582092 |
| H  | 4.403229481  | 2.625666659  | -5.0814466   |
| C  | 0.768286703  | 3.484441803  | 0.094079114  |
| C  | 1.527641265  | 4.580857806  | 0.504906315  |
| C  | -0.587771282 | 3.667829204  | -0.136173749 |
| C  | 0.93097838   | 5.81688035   | 0.699735417  |
| C  | -1.188583257 | 4.90515941   | 0.040328201  |
| C  | -0.42969218  | 5.983602903  | 0.468537589  |
| H  | 2.591255545  | 4.472662323  | 0.678488439  |
| H  | -1.174375743 | 2.813207061  | -0.439363765 |
| H  | 1.532453449  | 6.656472429  | 1.030205133  |
| H  | -2.252055689 | 5.017989633  | -0.140536161 |
| H  | -0.892981306 | 6.951473027  | 0.624292637  |

|   |              |              |              |
|---|--------------|--------------|--------------|
| C | 2.94048176   | 1.83279943   | 0.852165739  |
| C | 2.833654838  | 2.332758872  | 2.14986299   |
| C | 4.155439361  | 1.273684992  | 0.457176481  |
| C | 3.913785093  | 2.298196299  | 3.016850439  |
| C | 5.233407715  | 1.226010855  | 1.329970876  |
| C | 5.120680829  | 1.744902933  | 2.61212039   |
| H | 1.897145988  | 2.755289937  | 2.489488874  |
| H | 4.271267763  | 0.867033339  | -0.53910866  |
| H | 3.804411569  | 2.695537531  | 4.019752791  |
| H | 6.166327447  | 0.781251564  | 1.001345169  |
| H | 5.963768344  | 1.711467685  | 3.292774204  |
| C | -0.675673795 | 1.594414527  | 3.033183181  |
| C | -0.958654593 | 2.955859956  | 3.150773521  |
| C | 0.290246352  | 1.051961894  | 3.880695483  |
| C | -0.323466835 | 3.736075511  | 4.105958784  |
| C | 0.896106085  | 1.820455637  | 4.861849686  |
| C | 0.591724619  | 3.16824857   | 4.981469615  |
| H | -1.674424765 | 3.42117019   | 2.487651305  |
| H | 0.609228482  | 0.027370126  | 3.75639287   |
| H | -0.553689794 | 4.79410056   | 4.16732487   |
| H | 1.634215662  | 1.36492235   | 5.51194059   |
| H | 1.077529092  | 3.775575544  | 5.736751166  |
| C | -2.979719822 | 1.516834167  | 1.397225636  |
| C | -3.382156173 | 1.763876545  | 0.097046261  |
| C | -3.808894733 | 1.927795688  | 2.44313306   |
| C | -4.572723753 | 2.423797359  | -0.178268645 |
| C | -4.993845015 | 2.592994291  | 2.17996995   |
| C | -5.378955186 | 2.845657979  | 0.866297108  |
| H | -2.754897409 | 1.406138304  | -0.705960197 |
| H | -3.527032081 | 1.723330265  | 3.46999278   |
| H | -4.865936753 | 2.600347031  | -1.207138296 |
| H | -5.62554344  | 2.912496679  | 3.001399772  |
| H | -6.309388562 | 3.36407927   | 0.663531435  |
| C | -2.274673169 | -0.787294675 | 2.671333809  |
| C | -3.422699528 | -1.337944636 | 2.092566998  |
| C | -1.824491927 | -1.336860968 | 3.867556046  |
| C | -4.077264204 | -2.41191805  | 2.66951043   |
| C | -2.4813347   | -2.413926847 | 4.450780737  |
| C | -3.604056597 | -2.963397167 | 3.853886694  |
| H | -3.814584141 | -0.91578181  | 1.176617389  |
| H | -0.959734604 | -0.934302412 | 4.371105563  |
| H | -4.962263889 | -2.817431829 | 2.191282398  |
| H | -2.103359    | -2.822387587 | 5.381743234  |
| H | -4.110997141 | -3.806987609 | 4.308287858  |
| C | -0.750985207 | 1.086541147  | -3.264945193 |
| C | 0.235205908  | 1.038218993  | -4.248801395 |
| C | -1.481025925 | 2.26748285   | -3.12786205  |
| C | 0.462674308  | 2.119335572  | -5.08555125  |
| C | -1.253825095 | 3.352160436  | -3.96035137  |
| C | -0.283682713 | 3.279998133  | -4.94945483  |
| H | 0.835275024  | 0.145685045  | -4.367619435 |
| H | -2.254020039 | 2.351085929  | -2.375765919 |
| H | 1.237234985  | 2.054942891  | -5.840421872 |
| H | -1.841499669 | 4.254640479  | -3.833803595 |
| H | -0.104175202 | 4.126184841  | -5.60297084  |
| C | -0.644218074 | -1.75695671  | -3.189819096 |
| C | -0.184472448 | -2.932405521 | -2.615477241 |
| C | -0.987342214 | -1.769381987 | -4.54353534  |
| C | -0.0387034   | -4.092699929 | -3.365091804 |
| C | -0.833830745 | -2.919627447 | -5.299738014 |
| C | -0.35499828  | -4.086986955 | -4.713957665 |
| H | 0.046513326  | -2.945150491 | -1.560730805 |

|   |              |              |              |
|---|--------------|--------------|--------------|
| H | -1.384784749 | -0.877640967 | -5.01286313  |
| H | 0.324388753  | -4.996488655 | -2.888265811 |
| H | -1.097308291 | -2.908453497 | -6.351722484 |
| H | -0.238216279 | -4.986256893 | -5.308318182 |
| C | -2.814626714 | -0.579981544 | -2.169699615 |
| C | -3.677095583 | 0.001126105  | -3.095027377 |
| C | -3.326142038 | -1.524430772 | -1.284077851 |
| C | -5.025829626 | -0.329879301 | -3.104988588 |
| C | -4.66704143  | -1.871173271 | -1.303778281 |
| C | -5.527199266 | -1.26362632  | -2.209467025 |
| H | -3.304829278 | 0.717751673  | -3.815836841 |
| H | -2.655748366 | -1.989268984 | -0.570326758 |
| H | -5.68664731  | 0.144384301  | -3.822401642 |
| H | -5.042730551 | -2.608816525 | -0.602768904 |
| H | -6.580620716 | -1.519605807 | -2.219395483 |

---

Table S11: Pt EXAFS fitting results for tetrakis(triphenylphosphine)platinum(0)

| R-factor  | $\Delta E_0$ (eV) | P |         |                                             | $C_{\text{short}}$ |         |                                             | $C_{\text{long}}$ |         |                                             |
|-----------|-------------------|---|---------|---------------------------------------------|--------------------|---------|---------------------------------------------|-------------------|---------|---------------------------------------------|
|           |                   | N | R (Å)   | $\sigma^2 \times 10^{-3}$ (Å <sup>2</sup> ) | N                  | R (Å)   | $\sigma^2 \times 10^{-3}$ (Å <sup>2</sup> ) | N                 | R (Å)   | $\sigma^2 \times 10^{-3}$ (Å <sup>2</sup> ) |
| 0.4141646 | 4.167             | 1 | 2.32862 | 1.39                                        |                    |         |                                             |                   |         |                                             |
| 0.2108676 | 2.81              | 2 | 2.32458 | 5.06                                        |                    |         |                                             |                   |         |                                             |
| 0.1107222 | 1.822             | 3 | 2.32144 | 7.73                                        |                    |         |                                             |                   |         |                                             |
| 0.0643505 | 1.102             | 4 | 2.31873 | 9.98                                        |                    |         |                                             |                   |         |                                             |
| 0.0493163 | 0.346             | 5 | 2.31651 | 11.99                                       |                    |         |                                             |                   |         |                                             |
| 0.1001759 | 1.648             | 3 | 2.32033 | 7.73                                        | 1                  | 3.62009 | 1.43                                        |                   |         |                                             |
| 0.0955696 | 1.706             | 3 | 2.32065 | 7.73                                        | 2                  | 3.63705 | 5.91                                        |                   |         |                                             |
| 0.0921992 | 1.75              | 3 | 2.32089 | 7.73                                        | 3                  | 3.6493  | 9.1                                         |                   |         |                                             |
| 0.0896898 | 1.794             | 3 | 2.32112 | 7.73                                        | 4                  | 3.65826 | 11.64                                       |                   |         |                                             |
| 0.0877173 | 1.829             | 3 | 2.32131 | 7.73                                        | 5                  | 3.66499 | 13.79                                       |                   |         |                                             |
| 0.086138  | 1.857             | 3 | 2.32146 | 7.73                                        | 6                  | 3.6703  | 15.68                                       |                   |         |                                             |
| 0.0550806 | 0.894             | 4 | 2.31792 | 9.99                                        | 1                  | 3.60975 | 1.08                                        |                   |         |                                             |
| 0.0510066 | 0.921             | 4 | 2.31806 | 9.99                                        | 2                  | 3.62693 | 5.71                                        |                   |         |                                             |
| 0.0483061 | 0.97              | 4 | 2.31833 | 9.99                                        | 3                  | 3.63966 | 9.03                                        |                   |         |                                             |
| 0.0463496 | 1.015             | 4 | 2.31858 | 9.99                                        | 4                  | 3.64885 | 11.66                                       |                   |         |                                             |
| 0.0448698 | 1.052             | 4 | 2.31878 | 9.99                                        | 5                  | 3.65571 | 13.87                                       |                   |         |                                             |
| 0.0437284 | 1.082             | 4 | 2.31895 | 9.99                                        | 6                  | 3.66108 | 15.81                                       |                   |         |                                             |
| 0.0408819 | 0.242             | 5 | 2.31577 | 12                                          | 1                  | 3.60182 | 0.79                                        |                   |         |                                             |
| 0.037536  | 0.272             | 5 | 2.31592 | 12                                          | 2                  | 3.61873 | 5.51                                        |                   |         |                                             |
| 0.0353969 | 0.325             | 5 | 2.31622 | 12                                          | 3                  | 3.63166 | 8.94                                        |                   |         |                                             |
| 0.0339141 | 0.373             | 5 | 2.31649 | 12                                          | 4                  | 3.64108 | 11.65                                       |                   |         |                                             |
| 0.0328475 | 0.413             | 5 | 2.31672 | 12                                          | 5                  | 3.64808 | 13.92                                       |                   |         |                                             |
| 0.0320746 | 0.446             | 5 | 2.3169  | 12                                          | 6                  | 3.65354 | 15.9                                        |                   |         |                                             |
| 0.0892758 | 2.012             | 3 | 2.3223  | 7.76                                        | 3                  | 3.64103 | 4.36                                        | 1                 | 3.82493 | -0.92                                       |
| 0.0873354 | 2.075             | 3 | 2.32264 | 7.75                                        | 3                  | 3.62319 | 3.65                                        | 2                 | 3.80469 | 2.76                                        |
| 0.0857712 | 2.114             | 3 | 2.32286 | 7.75                                        | 3                  | 3.61131 | 3.77                                        | 3                 | 3.79222 | 5.61                                        |
| 0.0845369 | 2.144             | 3 | 2.32301 | 7.75                                        | 3                  | 3.60331 | 4.16                                        | 4                 | 3.78435 | 8.12                                        |
| 0.0835588 | 2.169             | 3 | 2.32314 | 7.75                                        | 3                  | 3.59784 | 4.64                                        | 5                 | 3.77922 | 10.42                                       |
| 0.0827798 | 2.188             | 3 | 2.32324 | 7.75                                        | 3                  | 3.59409 | 5.16                                        | 6                 | 3.77583 | 12.57                                       |
| 0.0869483 | 2.025             | 3 | 2.32234 | 7.75                                        | 4                  | 3.64996 | 6.82                                        | 1                 | 3.83918 | -0.89                                       |
| 0.0855266 | 2.09              | 3 | 2.32271 | 7.75                                        | 4                  | 3.63415 | 5.81                                        | 2                 | 3.82244 | 2.62                                        |
| 0.0843262 | 2.128             | 3 | 2.32291 | 7.75                                        | 4                  | 3.62218 | 5.63                                        | 3                 | 3.81045 | 5.27                                        |
| 0.0833629 | 2.155             | 3 | 2.32306 | 7.75                                        | 4                  | 3.61332 | 5.83                                        | 4                 | 3.80203 | 7.62                                        |
| 0.0826037 | 2.177             | 3 | 2.32317 | 7.75                                        | 4                  | 3.60679 | 6.21                                        | 5                 | 3.79609 | 9.82                                        |
| 0.081989  | 2.194             | 3 | 2.32326 | 7.75                                        | 4                  | 3.60197 | 6.68                                        | 6                 | 3.79185 | 11.91                                       |
| 0.0851096 | 2.03              | 3 | 2.32235 | 7.75                                        | 5                  | 3.65608 | 8.97                                        | 1                 | 3.84901 | -0.79                                       |

|           |       |   |         |       |   |         |       |   |         |       |
|-----------|-------|---|---------|-------|---|---------|-------|---|---------|-------|
| 0.0840561 | 2.096 | 3 | 2.32272 | 7.75  | 5 | 3.64218 | 7.79  | 2 | 3.83545 | 2.65  |
| 0.0831524 | 2.134 | 3 | 2.32293 | 7.75  | 5 | 3.63085 | 7.41  | 3 | 3.82466 | 5.18  |
| 0.082411  | 2.159 | 3 | 2.32306 | 7.75  | 5 | 3.62186 | 7.45  | 4 | 3.81639 | 7.42  |
| 0.0818147 | 2.178 | 3 | 2.32316 | 7.75  | 5 | 3.61483 | 7.71  | 5 | 3.81014 | 9.53  |
| 0.0813344 | 2.193 | 3 | 2.32324 | 7.75  | 5 | 3.60941 | 8.11  | 6 | 3.80542 | 11.56 |
| 0.0844879 | 1.888 | 3 | 2.32162 | 7.72  | 6 | 3.6715  | 15.63 | 1 | 4.4883  | -0.34 |
| 0.0828682 | 2.096 | 3 | 2.32271 | 7.75  | 6 | 3.64829 | 9.62  | 2 | 3.8454  | 2.76  |
| 0.0822035 | 2.134 | 3 | 2.32292 | 7.75  | 6 | 3.63781 | 9.11  | 3 | 3.83601 | 5.23  |
| 0.0816389 | 2.158 | 3 | 2.32305 | 7.75  | 6 | 3.62907 | 9.02  | 4 | 3.82828 | 7.4   |
| 0.081182  | 2.176 | 3 | 2.32314 | 7.75  | 6 | 3.62195 | 9.19  | 5 | 3.8221  | 9.44  |
| 0.0808088 | 2.189 | 3 | 2.32321 | 7.75  | 6 | 3.61625 | 9.53  | 6 | 3.81721 | 11.44 |
| 0.0456522 | 1.237 | 4 | 2.31983 | 10.01 | 3 | 3.63369 | 4.07  | 1 | 3.81796 | -1.3  |
| 0.0442901 | 1.301 | 4 | 2.32019 | 10.01 | 3 | 3.61616 | 3.38  | 2 | 3.79857 | 2.45  |
| 0.0432594 | 1.346 | 4 | 2.32043 | 10.01 | 3 | 3.60437 | 3.51  | 3 | 3.78629 | 5.39  |
| 0.0424853 | 1.38  | 4 | 2.32061 | 10.01 | 3 | 3.59642 | 3.93  | 4 | 3.7784  | 7.98  |
| 0.0419117 | 1.406 | 4 | 2.32075 | 10.01 | 3 | 3.591   | 4.45  | 5 | 3.77318 | 10.37 |
| 0.0414843 | 1.426 | 4 | 2.32086 | 10.01 | 3 | 3.58731 | 5     | 6 | 3.76962 | 12.62 |
| 0.0439113 | 1.253 | 4 | 2.31989 | 10.01 | 4 | 3.64213 | 6.6   | 1 | 3.83158 | -1.2  |
| 0.0430049 | 1.321 | 4 | 2.32028 | 10.01 | 4 | 3.62676 | 5.58  | 2 | 3.81581 | 2.35  |
| 0.0422762 | 1.362 | 4 | 2.32051 | 10.01 | 4 | 3.61492 | 5.43  | 3 | 3.80408 | 5.07  |
| 0.0417307 | 1.392 | 4 | 2.32067 | 10.01 | 4 | 3.6061  | 5.65  | 4 | 3.79569 | 7.5   |
| 0.0413337 | 1.415 | 4 | 2.32079 | 10.01 | 4 | 3.59958 | 6.06  | 5 | 3.78969 | 9.78  |
| 0.0410458 | 1.433 | 4 | 2.32089 | 10.01 | 4 | 3.59481 | 6.57  | 6 | 3.78534 | 11.95 |
| 0.0425961 | 1.261 | 4 | 2.31992 | 10.01 | 5 | 3.64792 | 8.79  | 1 | 3.84103 | -1.06 |
| 0.0420072 | 1.33  | 4 | 2.32031 | 10.01 | 5 | 3.63448 | 7.61  | 2 | 3.82841 | 2.42  |
| 0.04153   | 1.371 | 4 | 2.32054 | 10.01 | 5 | 3.62332 | 7.25  | 3 | 3.81796 | 5.01  |
| 0.0411683 | 1.398 | 4 | 2.31069 | 10.01 | 5 | 3.61438 | 7.3   | 4 | 3.80977 | 7.32  |
| 0.0409074 | 1.419 | 4 | 2.3208  | 10.01 | 5 | 3.60737 | 7.6   | 5 | 3.80348 | 9.5   |
| 0.0407232 | 1.435 | 4 | 2.32089 | 10.01 | 5 | 3.60197 | 8.04  | 6 | 3.79867 | 11.62 |
| 0.0416145 | 1.264 | 4 | 2.31992 | 10.01 | 6 | 3.65225 | 10.76 | 1 | 3.8481  | -0.9  |
| 0.0412529 | 1.332 | 4 | 2.32031 | 10.01 | 6 | 3.64032 | 9.48  | 2 | 3.83806 | 2.56  |
| 0.0409702 | 1.373 | 4 | 2.32054 | 10.01 | 6 | 3.63004 | 8.99  | 3 | 3.82903 | 5.09  |
| 0.0407564 | 1.4   | 4 | 2.32069 | 10.01 | 6 | 3.62138 | 8.91  | 4 | 3.82143 | 7.31  |
| 0.0406032 | 1.419 | 4 | 2.32079 | 10.01 | 6 | 3.61427 | 9.11  | 5 | 3.81522 | 9.43  |
| 0.0404964 | 1.433 | 4 | 2.32087 | 10.01 | 6 | 3.60858 | 9.5   | 6 | 3.81023 | 11.52 |
| 0.0408926 | 1.264 | 4 | 2.31991 | 10.01 | 7 | 3.65569 | 12.56 | 1 | 3.85367 | -0.74 |
| 0.0406984 | 1.33  | 4 | 2.32029 | 10.01 | 7 | 3.64493 | 11.23 | 2 | 3.84574 | 2.75  |
| 0.0405615 | 1.371 | 4 | 2.32052 | 10.01 | 7 | 3.63549 | 10.64 | 3 | 3.83807 | 5.25  |
| 0.040463  | 1.398 | 4 | 2.32067 | 10.01 | 7 | 3.6273  | 10.48 | 4 | 3.83124 | 7.44  |
| 0.0404932 | 1.417 | 4 | 2.32077 | 10.01 | 7 | 3.62034 | 10.61 | 5 | 3.82536 | 9.53  |
| 0.0403447 | 1.429 | 4 | 2.32084 | 10.01 | 7 | 3.61462 | 10.95 | 6 | 3.82042 | 11.61 |
| 0.0329218 | 0.6   | 5 | 2.31782 | 12.02 | 3 | 3.6281  | 3.89  | 1 | 3.81303 | -1.53 |
| 0.0320227 | 0.667 | 5 | 2.3182  | 12.02 | 3 | 3.61074 | 3.21  | 2 | 3.79404 | 2.29  |

|           |       |   |         |       |   |         |       |   |         |       |
|-----------|-------|---|---------|-------|---|---------|-------|---|---------|-------|
| 0.0313871 | 0.711 | 5 | 2.31844 | 12.02 | 3 | 3.59893 | 3.37  | 3 | 3.78172 | 5.31  |
| 0.0309752 | 0.746 | 5 | 2.31863 | 12.02 | 3 | 3.59101 | 3.81  | 4 | 3.77377 | 7.98  |
| 0.0307219 | 0.772 | 5 | 2.31878 | 12.02 | 3 | 3.58563 | 4.36  | 5 | 3.76844 | 10.45 |
| 0.0305766 | 0.792 | 5 | 2.31888 | 12.02 | 3 | 3.58202 | 4.94  | 6 | 3.76474 | 12.79 |
| 0.0316568 | 0.618 | 5 | 2.3179  | 12.02 | 4 | 3.63614 | 6.46  | 1 | 3.82626 | -1.4  |
| 0.0311468 | 0.686 | 5 | 2.31829 | 12.02 | 4 | 3.621   | 5.45  | 2 | 3.81094 | 2.22  |
| 0.0307871 | 0.729 | 5 | 2.31853 | 12.02 | 4 | 3.6092  | 5.31  | 3 | 3.79928 | 5     |
| 0.0305704 | 0.759 | 5 | 2.3187  | 12.02 | 4 | 3.60039 | 5.55  | 4 | 3.79085 | 7.5   |
| 0.0304653 | 0.783 | 5 | 2.31883 | 12.02 | 4 | 3.5939  | 5.99  | 5 | 3.78478 | 9.84  |
| 0.0304363 | 0.801 | 5 | 2.31893 | 12.02 | 4 | 3.58918 | 6.53  | 6 | 3.78033 | 12.1  |
| 0.0307789 | 0.628 | 5 | 2.31794 | 12.02 | 5 | 3.64163 | 8.69  | 1 | 3.83544 | -1.24 |
| 0.0305415 | 0.697 | 5 | 2.31833 | 12.02 | 5 | 3.62846 | 7.51  | 2 | 3.82331 | 2.3   |
| 0.0303965 | 0.739 | 5 | 2.31857 | 12.02 | 5 | 3.61738 | 7.15  | 3 | 3.81298 | 4.94  |
| 0.0303332 | 0.767 | 5 | 2.31873 | 12.02 | 5 | 3.60845 | 7.23  | 4 | 3.80477 | 7.31  |
| 0.0303379 | 0.788 | 5 | 2.31885 | 12.02 | 5 | 3.60145 | 7.55  | 5 | 3.79842 | 9.56  |
| 0.0303893 | 0.804 | 5 | 2.31893 | 12.02 | 5 | 3.59609 | 8.03  | 6 | 3.79354 | 11.76 |
| 0.0301978 | 0.633 | 5 | 2.31795 | 12.02 | 6 | 3.64573 | 10.68 | 1 | 3.84229 | -1.07 |
| 0.0301524 | 0.701 | 5 | 2.31834 | 12.02 | 6 | 3.63408 | 9.4   | 2 | 3.83275 | 2.45  |
| 0.0301682 | 0.743 | 5 | 2.31858 | 12.02 | 6 | 3.62391 | 8.91  | 3 | 3.8239  | 5.02  |
| 0.0302241 | 0.771 | 5 | 2.31874 | 12.02 | 6 | 3.61528 | 8.86  | 4 | 3.81631 | 7.31  |
| 0.0303115 | 0.79  | 5 | 2.31884 | 12.02 | 6 | 3.60818 | 9.09  | 5 | 3.81006 | 9.5   |
| 0.0304175 | 0.804 | 5 | 2.31892 | 12.02 | 6 | 3.60251 | 9.5   | 6 | 3.805   | 11.66 |
